# Supplementary material for: Profiling Phospholipids within Atlantic Salmon Salmo salar with Regards to a Novel Terrestrial Omega-3 Oil Source
Source: MDPI journal article supplement (doi:10.3390/metabo12090851), 2022-09-10
Supplement: s1 [file s1]

Supplementary Table S11. LC-MS/MS data for brain tissue at the final timepoint. Green and red represent high and low absolute peak areas, respectively.  $p < 0.01 = **$ ,  $p = 0.01-0.05 = *$ . Stars with a red background denote falling below the Benjamini-Hochberg critical value.

| MW    | Simple ID | ID 1             | ID2               |       | Cont | GM | Fold | Highest | RSD% | RSD% | p  |           | Cont | GM   | RSD% | RSD% | p  |
|-------|-----------|------------------|-------------------|-------|------|----|------|---------|------|------|----|-----------|------|------|------|------|----|
| 714.5 | PE 34:2   | PE 16:1/18:1     |                   | Area  |      |    | 1.3  | Control | 32.8 | 14.7 |    | %         | 67.1 | 61.3 | 13.1 | 5.4  |    |
|       |           | PE 16:0/18:2     |                   | Area  |      |    | 1.1  | GM      | 8.6  | 6.0  |    | %         | 32.9 | 38.7 | 26.8 | 8.5  |    |
|       |           |                  |                   | total |      |    | 1.1  | Control | 20.7 | 10.3 |    |           |      |      |      |      |    |
| 738.5 | PE 36:4   | PE 18:1/18:3     |                   | Area  |      |    | 2.3  | GM      | 6.6  | 6.6  | ** | %         | 24.9 | 27.6 | 17.4 | 7.1  |    |
|       |           | PE 16:0/20:4     |                   | Area  |      |    | 1.9  | GM      | 18.1 | 11.6 | ** | %         | 75.1 | 72.4 | 5.8  | 2.7  |    |
|       |           |                  |                   | total |      |    | 2.0  | GM      | 12.1 | 9.6  | ** |           |      |      |      |      |    |
| 742.5 | PE 36:2   | PE 18:1/18:1     |                   | Area  |      |    | 1.1  | Control | 20.3 | 7.1  |    | %         | 93.5 | 92.4 | 0.5  | 1.5  |    |
|       |           | PE 18:2/18:0     |                   | Area  |      |    | 1.0  | GM      | 19.4 | 13.6 |    | %         | 6.5  | 7.6  | 7.8  | 18.9 |    |
|       |           |                  |                   | total |      |    | 1.1  | Control | 20.1 | 5.8  |    |           |      |      |      |      |    |
| 746.5 | PE O-38:7 | PE P-18:1/20:5   |                   | Area  |      |    | 1.1  | GM      | 17.7 | 7.8  |    | %         | 85.0 | 75.7 | 1.5  | 3.4  | ** |
|       |           | PE P-16:0/22:6   |                   | Area  |      |    | 2.0  | GM      | 16.4 | 13.4 | ** | %         | 15.0 | 24.3 | 8.3  | 10.6 | ** |
|       |           |                  |                   | total |      |    | 1.3  | GM      | 17.2 | 7.3  |    |           |      |      |      |      |    |
| 760.5 | PE 38:7   | PE 18:2/20:5     |                   | Area  |      |    | 1.9  | GM      | 11.6 | 8.0  | ** | %         | 42.4 | 59.9 | 3.8  | 5.1  | ** |
|       |           | PE 16:1/22:6     |                   | Area  |      |    | 1.1  | Control | 6.7  | 15.7 |    | %         | 57.6 | 40.1 | 2.8  | 7.6  | ** |
|       |           |                  |                   | total |      |    | 1.3  | GM      | 8.5  | 9.9  | *  |           |      |      |      |      |    |
| 766.5 | PE 38:4   | PE 18:1/20:3     |                   | Area  |      |    | 2.1  | GM      | 14.7 | 8.3  | ** | %         | 42.0 | 37.3 | 12.5 | 12.6 |    |
|       |           | PE 18:0/20:4     |                   | Area  |      |    | 2.5  | GM      | 28.4 | 21.6 | *  | %         | 58.0 | 62.7 | 9.1  | 7.5  |    |
|       |           |                  |                   | total |      |    | 2.3  | GM      | 21.2 | 15.6 | ** |           |      |      |      |      |    |
| 768.6 | PE 38:3   | PE 18:1/20:2     |                   | Area  |      |    | 1.4  | GM      | 18.6 | 9.0  | *  | %         | 36.3 | 41.3 | 10.2 | 2.5  |    |
|       |           | PE 16:1/22:2     |                   | Area  |      |    | 1.1  | GM      | 7.3  | 12.9 |    | %         | 63.7 | 58.7 | 5.8  | 1.8  |    |
|       |           |                  |                   | total |      |    | 1.2  | GM      | 10.3 | 11.3 |    |           |      |      |      |      |    |
| 774.5 | PE O-40:7 | PE P-18:1/22:5   |                   | Area  |      |    | 1.1  | GM      | 8.1  | 9.7  |    | %         | 47.3 | 41.8 | 19.7 | 16.1 |    |
|       |           | PE P-18:0/22:6   |                   | Area  |      |    | 1.3  | GM      | 43.3 | 19.3 |    | %         | 52.7 | 58.2 | 17.7 | 11.6 |    |
|       |           |                  |                   | total |      |    | 1.2  | GM      | 27.3 | 9.6  |    |           |      |      |      |      |    |
| 784.5 | PE 40:9   | PE 20:4/20:5     |                   | Area  |      |    | 1.5  | GM      | 44.4 | 56.1 |    | %         | 35.5 | 18.4 | 33.1 | 48.2 |    |
|       |           | PE 18:3/22:6     |                   | Area  |      |    | 3.6  | GM      | 10.0 | 5.0  | ** | %         | 64.5 | 81.6 | 18.2 | 10.9 |    |
|       |           |                  |                   | total |      |    | 2.8  | GM      | 14.7 | 7.9  | ** |           |      |      |      |      |    |
| 786.5 | PE 40:8   | PE 20:3/20:5     |                   | Area  |      |    | 3.1  | GM      | 13.0 | 15.0 | ** | %         | 25.7 | 42.8 | 13.6 | 8.7  | ** |
|       |           | PE 18:2/22:6     |                   | Area  |      |    | 1.4  | GM      | 5.6  | 1.8  | ** | %         | 74.3 | 57.2 | 4.7  | 6.5  | ** |
|       |           |                  |                   | total |      |    | 1.8  | GM      | 1.4  | 6.8  | ** |           |      |      |      |      |    |
| 788.5 | PE 40:7   | PE 20:2/20:5     |                   | Area  |      |    | 1.7  | GM      | 10.2 | 5.4  | ** | %         | 3.4  | 6.0  | 23.4 | 14.1 | *  |
|       |           | PE 18:1/22:6     |                   | Area  |      |    | 1.1  | Control | 20.8 | 12.5 |    | %         | 96.6 | 94.0 | 0.8  | 0.9  | *  |
|       |           |                  |                   | total |      |    | 1.1  | Control | 20.0 | 11.7 |    |           |      |      |      |      |    |
| 802.6 | PC 34:2   | PC 16:1/18:1     |                   | Area  |      |    | 1.4  | Control | 9.8  | 11.0 | *  | %         | 30.7 | 18.2 | 4.1  | 4.7  | ** |
|       |           | PC 16:0/18:2 (a) |                   | Area  |      |    | 1.4  | GM      | 6.9  | 4.0  | ** | %         | 43.4 | 53.0 | 4.9  | 8.4  | *  |
|       |           | PC 16:0/18:2 (b) |                   | Area  |      |    | 1.3  | GM      | 9.0  | 20.5 |    | %         | 26.0 | 28.8 | 8.8  | 14.2 |    |
|       |           |                  |                   | Total |      |    | 1.2  | GM      | 5.9  | 6.8  | *  | Ratio a/b | 1.7  | 1.9  | 13.8 | 22.1 |    |
| 810.5 | PE 42:10  | PE 20:5/22:5     |                   | Area  |      |    | 1.1  | Control | 30.5 | 27.3 |    | %         | 30.8 | 14.9 | 28.6 | 32.6 |    |
|       |           | PE 20:4/22:6 (a) |                   | Area  |      |    | 2.7  | GM      | 26.2 | 18.4 | ** | %         | 37.0 | 51.4 | 25.8 | 8.0  |    |
|       |           | PE 20:4/22:6 (b) |                   | Area  |      |    | 2.0  | GM      | 17.6 | 11.6 | ** | %         | 32.2 | 33.8 | 7.9  | 4.4  |    |
|       |           |                  |                   | Total |      |    | 1.9  | GM      | 10.2 | 10.4 | ** | Ratio a/b | 1.2  | 1.5  | 30.1 | 7.5  |    |
| 822.5 | PC 36:6   | PC 16:1/20:5     |                   | Area  |      |    | 2.1  | Control | 32.8 | 33.9 |    | %         | 30.7 | 28.9 | 19.6 | 21.1 |    |
|       |           | PC 14:0/22:6     |                   | Area  |      |    | 2.0  | Control | 27.0 | 12.1 | *  | %         | 69.3 | 71.1 | 8.7  | 8.6  |    |
|       |           |                  |                   | total |      |    | 2.1  | Control | 25.6 | 15.1 | *  |           |      |      |      |      |    |
| 826.6 | PC 36:4   | PC 18:3/18:1     |                   | Area  |      |    | 1.6  | GM      | 31.5 | 9.2  | *  | %         | 14.3 | 11.9 | 22.0 | 21.1 |    |
|       |           | PC 16:0/20:4     |                   | Area  |      |    | 2.1  | GM      | 12.5 | 16.9 | ** | %         | 85.7 | 88.1 | 3.7  | 2.9  |    |
|       |           |                  |                   | total |      |    | 2.0  | GM      | 13.6 | 14.5 | ** |           |      |      |      |      |    |
| 885.6 | PI 38:4   | PI 18:0/20:4 (a) |                   | Area  |      |    | 1.2  | GM      | 70.1 | 82.4 |    | %         | 66.7 | 55.8 | 30.6 | 34.5 |    |
|       |           | PI 18:0/20:4 (b) |                   | Area  |      |    | 2.2  | GM      | 18.9 | 20.6 | *  | %         | 33.3 | 44.2 | 61.5 | 43.4 |    |
|       |           |                  |                   | total |      |    | 1.5  | GM      | 56.2 | 50.7 |    | Ratio a/b | 2.7  | 1.7  | 66.7 | 89.7 |    |
| 910.6 | PC 42:4   | PC 18:1/24:3     | PC 22:3/20:1      | Area  |      |    | 2.4  | GM      | 3.0  | 8.8  | ** | %         | 26.8 | 32.4 | 1.5  | 0.1  | ** |
|       |           | PC 18:3/24:1     |                   | Area  |      |    | 1.8  | GM      | 3.0  | 8.7  | ** | %         | 73.2 | 67.6 | 0.6  | 0.1  | ** |
|       |           |                  |                   | total |      |    | 2.0  | GM      | 2.8  | 8.7  | ** |           |      |      |      |      |    |
| 912.7 | PC 42:3   | PC 18:1/24:2     |                   | Area  |      |    | 1.3  | GM      | 8.6  | 9.5  | *  | %         | 88.5 | 88.4 | 2.8  | 1.6  |    |
|       |           | PC 18:2/24:1     |                   | Area  |      |    | 1.3  | GM      | 30.2 | 12.1 |    | %         | 11.5 | 11.6 | 21.2 | 12.4 |    |
|       |           |                  |                   | total |      |    | 1.3  | GM      | 10.9 | 8.7  | *  |           |      |      |      |      |    |
| 932.6 | PC 44:7   | PC 20:5/24:2     |                   | Area  |      |    | 1.6  | GM      | 29.0 | 17.2 |    | %         | 52.2 | 69.5 | 20.9 | 6.8  |    |
|       |           | PC 22:6/22:1     |                   | Area  |      |    | 1.3  | Control | 13.2 | 5.4  | *  | %         | 47.8 | 30.5 | 22.9 | 15.4 |    |
|       |           |                  |                   | total |      |    | 1.2  | GM      | 10.4 | 11.2 |    |           |      |      |      |      |    |
| 936.7 | PC 44:5   | PC 20:4/24:1 (a) |                   | Area  |      |    | 2.0  | GM      | 10.1 | 20.3 | *  | %         | 25.8 | 27.4 | 12.1 | 10.0 |    |
|       |           | PC 20:4/24:1 (b) |                   | Area  |      |    | 2.0  | GM      | 24.7 | 13.8 | ** | %         | 52.9 | 59.8 | 7.0  | 2.4  | *  |
|       |           | PC 20:5/24:0     |                   | Area  |      |    | 1.1  | GM      | 19.8 | 5.3  |    | %         | 21.3 | 12.8 | 11.2 | 14.3 | ** |
|       |           |                  |                   | Total |      |    | 1.8  | GM      | 18.7 | 13.4 | ** | Ratio a/b | 0.5  | 0.5  | 18.7 | 12.0 |    |
| 938.7 | PC 44:4   | PC 20:3/24:1     |                   | Area  |      |    | 1.8  | GM      | 21.7 | 16.2 | *  | %         | 93.3 | 89.5 | 0.9  | 2.1  | *  |
|       |           | PC 20:4/24:0     |                   | Area  |      |    | 2.9  | GM      | 30.6 | 36.5 | *  | %         | 6.7  | 10.5 | 12.6 | 17.7 | *  |
|       |           |                  |                   | total |      |    | 1.9  | GM      | 22.1 | 18.4 | *  |           |      |      |      |      |    |
| 940.7 | PC 44:3   | PC 18:1/26:2     | PC 20:2/C24:1 (a) | Area  |      |    | 1.4  | GM      | 7.2  | 27.7 |    | %         | 36.0 | 38.7 | 14.0 | 16.2 |    |
|       |           | PC 20:2/24:1 (b) | PC 18:2/26:1      | Area  |      |    | 1.2  | GM      | 19.1 | 11.1 |    | %         | 64.0 | 61.3 | 7.9  | 10.2 |    |
|       |           |                  |                   | total |      |    | 1.3  | GM      | 12.5 | 15.5 |    | Ratio b/a | 1.8  | 1.6  | 21.2 | 28.2 |    |
| 962.7 | PC 46:6   | PC 24:1/22:5     |                   | Area  |      |    | 1.3  | GM      | 16.9 | 8.3  |    | %         | 77.6 | 80.6 | 3.5  | 1.6  |    |
|       |           | PC 20:5/26:2     |                   | Area  |      |    | 1.0  | GM      | 31.3 | 8.2  |    | %         | 22.4 | 19.4 | 12.2 | 6.8  |    |
|       |           |                  |                   | total |      |    | 1.2  | GM      | 20.2 | 7.6  |    |           |      |      |      |      |    |
| 964.7 | PC 46:5   | PC 22:4/24:1     | PC 20:4/26:1 (a)  | Area  |      |    | 2.7  | GM      | 29.7 | 12.5 | ** | %         | 54.6 | 64.1 | 8.2  | 1.1  | *  |
|       |           | PC 22:5/24:0     | PC 20:4/26:1 (b)  | Area  |      |    | 1.9  | GM      | 17.1 | 11.4 | ** | %         | 45.4 | 35.9 | 9.9  | 1.9  | *  |
|       |           |                  |                   | total |      |    | 2.3  | GM      | 23.7 | 12.1 | ** | Ratio a/b | 1.2  | 1.8  | 17.4 | 2.9  | *  |

Supplementary Table S12. LC-MS/MS data for brain tissue at the intermediate timepoint. Green and red represent high and low absolute peak areas, respectively.  $p < 0.01 = **$ ,  $p = 0.01-0.05 = *$ . Stars with a red background denote falling below the Benjamini-Hochberg critical value.

| MW    | Simple ID | ID 1               | ID 2         | ID 3         | Control | GM | Fold | Highest | RSD% | RSD% | p           | Control | GM   | RSD% | RSD% | p  |
|-------|-----------|--------------------|--------------|--------------|---------|----|------|---------|------|------|-------------|---------|------|------|------|----|
| 750.5 | PE O-38:5 | PE P-18:0/20:4 (a) |              |              | Area    |    | 1.6  | GM      | 33.0 | 33.2 | %           | 32.7    | 34.4 | 6.0  | 12.8 |    |
|       |           | PE P-18:0/20:4 (b) |              |              | Area    |    | 1.4  | GM      | 37.2 | 21.7 | %           | 67.3    | 65.6 | 2.9  | 6.7  |    |
|       |           |                    |              |              | Total   |    | 1.5  | GM      | 35.6 | 25.1 | Ratio b/a   | 2.1     | 1.9  | 9.2  | 20.0 |    |
| 766.5 | PE 38:4   | PE 18:1/20:3       |              |              | Area    |    | 1.7  | GM      | 23.3 | 15.7 | *           | 36.9    | 37.3 | 15.7 | 8.3  |    |
|       |           | PE 18:0/20:4       |              |              | Area    |    | 1.7  | GM      | 20.3 | 26.8 | %           | 63.1    | 62.7 | 9.2  | 4.9  |    |
|       |           |                    |              |              | Total   |    | 1.7  | GM      | 16.9 | 22.7 | *           |         |      |      |      |    |
| 784.5 | PE 40:9   | PE 20:4/20:5       |              |              | Area    |    | 2.1  | GM      | 48.8 | 29.1 | %           | 12.5    | 16.4 | 43.6 | 13.1 |    |
|       |           | PE 18:3/22:6       |              |              | Area    |    | 1.5  | GM      | 32.4 | 29.2 | %           | 87.5    | 83.6 | 6.2  | 2.6  |    |
|       |           |                    |              |              | Total   |    | 1.5  | GM      | 30.2 | 28.4 |             |         |      |      |      |    |
| 786.5 | PE 40:8   | PE 20:5/20:3       |              |              | Area    |    | 1.9  | GM      | 31.2 | 18.7 | *           | 20.2    | 31.5 | 5.6  | 4.2  | ** |
|       |           | PE 18:2/22:6       |              |              | Area    |    | 1.1  | GM      | 26.5 | 20.0 | %           | 79.8    | 68.5 | 1.4  | 2.0  | ** |
|       |           |                    |              |              | Total   |    | 1.2  | GM      | 27.4 | 19.3 |             |         |      |      |      |    |
| 788.5 | PE 40:7   | PE 20:2/20:5       |              |              | Area    |    | 1.6  | GM      | 19.3 | 14.7 | *           | 1.7     | 4.3  | 25.6 | 28.8 | *  |
|       |           | PE 18:1/22:6 (a)   |              |              | Area    |    | 1.7  | Control | 37.0 | 13.4 | %           | 94.3    | 91.6 | 1.7  | 0.2  | *  |
|       |           | PE 18:1/22:6 (b)   |              |              | Area    |    | 1.7  | Control | 74.4 | 37.0 | %           | 4.0     | 4.1  | 51.3 | 26.7 |    |
|       |           |                    |              |              | Total   |    | 1.6  | Control | 38.3 | 13.3 | Ratio a/b   | 30.5    | 23.8 | 66.4 | 31.3 |    |
| 794.6 | PE 40:4   | PE 18:1/22:3       | PE 20:3/20:1 |              | Area    |    | 1.5  | GM      | 20.4 | 54.7 | %           | 40.9    | 39.6 | 7.1  | 22.2 |    |
|       |           | PE 18:0/22:4       |              |              | Area    |    | 1.4  | GM      | 32.2 | 27.5 | %           | 59.1    | 60.4 | 4.9  | 14.6 |    |
|       |           |                    |              |              | Total   |    | 1.5  | GM      | 27.3 | 37.6 |             |         |      |      |      |    |
| 810.5 | PE 42:10  | PE 20:5/22:5       |              |              | Area    |    | 1.1  | Control | 20.7 | 31.5 | %           | 22.6    | 14.5 | 12.4 | 9.4  | *  |
|       |           | PE 20:4/22:6 (a)   |              |              | Area    |    | 1.4  | GM      | 37.7 | 31.3 | %           | 47.8    | 49.4 | 9.1  | 8.2  |    |
|       |           | PE 20:4/22:6 (b)   |              |              | Area    |    | 1.7  | GM      | 27.7 | 14.1 | *           | 29.6    | 36.1 | 6.8  | 14.8 |    |
|       |           |                    |              |              | Total   |    | 1.4  | GM      | 30.8 | 23.7 | Ratio a/b   | 1.6     | 1.4  | 15.0 | 24.7 |    |
| 814.5 | PE 42:8   | PE 20:2/22:6 (a)   |              |              | Area    |    | 1.1  | Control | 34.0 | 20.1 | %           | 64.6    | 65.2 | 15.7 | 6.4  |    |
|       |           | PE 20:2/22:6 (b)   |              |              | Area    |    | 1.3  | Control | 64.4 | 6.7  | %           | 35.4    | 34.8 | 28.7 | 11.9 |    |
|       |           |                    |              |              | Total   |    | 1.1  | Control | 45.6 | 14.3 | Ratio a/b   | 2.0     | 1.9  | 49.8 | 17.7 |    |
| 822.5 | PC 36:6   | PC 16:1/20:5       |              |              | Area    |    | 2.1  | Control | 22.5 | 3.0  | *           | 22.1    | 24.0 | 15.4 | 33.5 |    |
|       |           | PC 14:0/22:6       |              |              | Area    |    | 2.1  | Control | 24.7 | 46.9 | %           | 77.9    | 76.0 | 4.4  | 10.6 |    |
|       |           |                    |              |              | Total   |    | 2.1  | Control | 22.5 | 37.1 | *           |         |      |      |      |    |
| 874.6 | PC 40:8   | PC 20:3/20:5       | PC 20:4/20:4 |              | Area    |    | 2.1  | GM      | 36.6 | 18.4 | *           | 14.6    | 28.7 | 32.3 | 13.6 | *  |
|       |           | PC 18:2/22:6       |              |              | Area    |    | 1.1  | Control | 2.2  | 9.4  | %           | 85.4    | 71.3 | 5.5  | 5.5  | *  |
|       |           |                    |              |              | Total   |    | 1.1  | GM      | 6.2  | 9.6  |             |         |      |      |      |    |
| 876.6 | PC 40:7   | PC 18:1/22:6 (a)   |              |              | Area    |    | 1.4  | Control | 19.8 | 19.6 | %           | 63.0    | 73.9 | 2.0  | 1.2  | ** |
|       |           | PC 18:1/22:6 (b)   |              |              | Area    |    | 2.3  | Control | 18.8 | 16.4 | **          | 37.0    | 26.1 | 3.4  | 3.3  | ** |
|       |           |                    |              |              | Total   |    | 1.6  | Control | 19.2 | 18.7 | * Ratio b/a | 0.6     | 0.4  | 5.4  | 4.5  | ** |
| 882.6 | PC 40:4   | PC 20:0/20:4       |              |              | Area    |    | 1.1  | Control | 23.4 | 20.7 | %           | 53.7    | 34.9 | 10.1 | 1.3  | ** |
|       |           | PC 18:1/22:3       | PC 20:3/20:1 | PC 20:2/20:2 | Area    |    | 2.0  | GM      | 35.8 | 19.7 | *           | 46.3    | 65.1 | 11.7 | 0.7  | ** |
|       |           |                    |              |              | Total   |    | 1.4  | GM      | 27.3 | 20.1 |             |         |      |      |      |    |
| 898.6 | PC 42:10  | PC 20:5/22:5       |              |              | Area    |    | 1.4  | GM      | 10.9 | 25.9 | %           | 17.7    | 14.1 | 23.6 | 20.7 |    |
|       |           | PC 20:4/22:6 (a)   |              |              | Area    |    | 1.5  | GM      | 15.8 | 24.3 | %           | 42.6    | 37.7 | 6.8  | 5.6  |    |
|       |           | PC 20:4/22:6 (b)   |              |              | Area    |    | 2.0  | GM      | 26.0 | 21.4 | *           | 39.8    | 48.1 | 12.7 | 8.4  |    |
|       |           |                    |              |              | Total   |    | 1.7  | GM      | 14.2 | 20.3 | * Ratio a/b | 1.1     | 0.8  | 17.4 | 13.6 |    |
| 910.6 | PC 42:4   | PC 20:1/22:3       |              |              | Area    |    | 1.5  | GM      | 31.5 | 23.8 | %           | 41.7    | 39.6 | 12.0 | 18.9 |    |
|       |           | PC 18:3/24:1       |              |              | Area    |    | 1.5  | GM      | 53.8 | 7.3  | %           | 58.3    | 60.4 | 8.6  | 12.4 |    |
|       |           |                    |              |              | Total   |    | 1.5  | GM      | 44.8 | 5.4  |             |         |      |      |      |    |
| 936.7 | PC 44:5   | PC 20:4/24:1 (a)   |              |              | Area    |    | 1.1  | GM      | 36.7 | 14.4 | %           | 40.4    | 33.9 | 13.5 | 16.2 |    |
|       |           | PC 20:4/24:1 (b)   |              |              | Area    |    | 2.0  | GM      | 32.2 | 25.8 | *           | 29.2    | 43.0 | 10.3 | 24.6 |    |
|       |           | PC 20:5/24:0       |              |              | Area    |    | 1.1  | GM      | 33.3 | 23.5 | %           | 30.4    | 23.2 | 27.2 | 23.3 |    |
|       |           |                    |              |              | Total   |    | 1.4  | GM      | 28.3 | 3.7  | Ratio a/b   | 1.4     | 0.8  | 6.2  | 36.7 | *  |
| 964.7 | PC 46:5   | PC 22:4/24:1       | PC 20:4/26:1 |              | Area    |    | 1.6  | GM      | 53.9 | 12.1 | %           | 52.2    | 69.0 | 8.2  | 4.2  | ** |
|       |           | PC 22:5/24:0       |              |              | Area    |    | 1.2  | Control | 40.9 | 1.9  | %           | 47.8    | 31.0 | 8.9  | 9.3  | ** |
|       |           |                    |              |              | Total   |    | 1.3  | GM      | 47.5 | 8.0  |             |         |      |      |      |    |

Supplementary Table S13. LC-MS/MS data for eye tissue at the final timepoint. Green and red represent high and low absolute peak areas, respectively.  $p < 0.01 = **$ ,  $p = 0.01-0.05 = *$ . Stars with a red background denote falling below the Benjamini-Hochberg critical value.

| MW    | Simple ID | ID1              | ID2          |       | Control | GM      | Fold | Highest | RSD%      | RSD%  | p           |           | Control | GM   | RSD% | RSD% | p  |
|-------|-----------|------------------|--------------|-------|---------|---------|------|---------|-----------|-------|-------------|-----------|---------|------|------|------|----|
| 722.5 | PE O-36:5 | PE O-18:3/18:2   |              | Area  |         |         | 3.6  | GM      | 11.6      | 28.8  | *           | %         | 44.8    | 49.7 | 19.8 | 9.5  |    |
|       |           | PE P-16:0/20:4   |              | Area  |         |         | 2.9  | GM      | 25.3      | 13.4  | **          | %         | 55.2    | 50.3 | 16.1 | 9.4  |    |
|       |           |                  |              | Total |         |         | 3.2  | GM      | 11.5      | 20.7  | **          |           |         |      |      |      |    |
| 726.6 | PE O-36:3 | PE O-18:2/18:1   |              | Area  |         |         | 1.3  | Control | 15.8      | 25.6  |             | %         | 94.7    | 92.0 | 1.3  | 1.3  |    |
|       |           | PE P-18:0/18:2   |              | Area  |         |         | 1.2  | GM      | 10.6      | 13.9  |             | %         | 5.3     | 8.0  | 23.8 | 15.1 |    |
|       |           |                  |              | Total |         |         | 1.3  | Control | 14.6      | 24.4  |             |           |         |      |      |      |    |
| 742.5 | PE 36:2   | PE 18:1/18:1     |              | Area  |         |         | 1.3  | Control | 18.7      | 18.0  |             | %         | 92.7    | 86.5 | 1.0  | 3.0  | *  |
|       |           | PE 18:0/18:2     | PE 16:0/20:2 | Area  |         |         | 1.5  | GM      | 24.2      | 24.6  |             | %         | 7.3     | 13.5 | 13.4 | 19.1 | *  |
|       |           |                  |              | Total |         |         | 1.2  | Control | 18.8      | 17.2  |             |           |         |      |      |      |    |
| 746.5 | PE O-38:7 | PE O-18:3/20:4   |              | Area  |         |         | 7.0  | GM      | 27.9      | 7.2   | **          | %         | 2.5     | 17.2 | 17.0 | 6.8  | ** |
|       |           | PE O-18:2/20:5   |              | Area  |         |         | 1.3  | Control | 15.2      | 10.1  |             | %         | 76.5    | 59.6 | 1.9  | 3.8  | ** |
|       |           | PE P-16:0/22:6   |              | Area  |         |         | 1.1  | GM      | 17.2      | 26.6  |             | %         | 21.0    | 23.2 | 5.1  | 14.8 |    |
|       |           |                  |              | Total |         |         | 1.0  | GM      | 15.5      | 13.4  |             |           |         |      |      |      |    |
| 750.5 | PE O-38:5 | PE O-18:2/20:3   |              | Area  |         |         | 1.5  | GM      | 22.9      | 22.4  |             | %         | 48.8    | 31.0 | 6.3  | 15.2 | ** |
|       |           | PE P-18:0/20:4   |              | Area  |         |         | 3.1  | GM      | 24.4      | 8.4   | **          | %         | 51.2    | 69.0 | 6.0  | 6.8  | ** |
|       |           |                  |              | Total |         |         | 2.3  | GM      | 22.7      | 10.0  | **          |           |         |      |      |      |    |
| 760.5 | PE 38:7   | PE 18:3/20:4     | PE 18:2/20:5 | Area  |         |         | 1.6  | GM      | 19.9      | 17.0  | *           | %         | 78.0    | 86.1 | 4.5  | 3.5  |    |
|       |           | PE 16:1/22:6     |              | Area  |         |         | 1.1  | Control | 34.7      | 26.6  |             | %         | 22.0    | 13.9 | 15.8 | 21.5 | *  |
|       |           |                  |              | Total |         |         | 1.4  | GM      | 22.4      | 16.6  |             |           |         |      |      |      |    |
| 762.6 | PE 38:6   | PE 18:2/20:4     |              | Area  |         |         | 3.2  | GM      | 10.2      | 4.7   | **          | %         | 5.6     | 15.5 | 25.0 | 8.5  | ** |
|       |           | PE 18:1/20:5     |              | Area  |         |         | 1.5  | Control | 20.3      | 25.4  |             | %         | 34.0    | 19.2 | 10.4 | 13.8 | ** |
|       |           | PE 16:0/22:6     |              | Area  |         |         | 1.2  | GM      | 15.6      | 12.8  |             | %         | 60.4    | 65.3 | 6.0  | 3.0  |    |
|       |           |                  |              | Total |         |         | 1.1  | GM      | 14.1      | 13.3  |             |           |         |      |      |      |    |
| 774.5 | PE O-40:7 | PE P-18:1/22:5   |              | Area  |         |         | 1.2  | Control | 18.9      | 23.0  |             | %         | 35.4    | 28.0 | 4.8  | 23.5 |    |
|       |           | PE P-18:0/22:6   |              | Area  |         |         | 1.2  | GM      | 18.8      | 10.8  |             | %         | 64.6    | 72.0 | 2.6  | 9.1  |    |
|       |           |                  |              | Total |         |         | 1.1  | GM      | 18.4      | 5.0   |             |           |         |      |      |      |    |
| 776.5 | PC 32:1   | PC 16:0/16:1 (a) | PC 14:0/18:1 | Area  |         |         | 1.8  | Control | 3.2       | 17.2  | **          | %         | 74.5    | 58.1 | 1.9  | 6.1  | ** |
|       |           | PC 16:0/16:1 (b) |              | Area  |         |         | 1.0  | GM      | 12.8      | 12.5  |             | %         | 21.1    | 30.0 | 9.4  | 9.9  | *  |
|       |           | PC 16:0/16:1 (c) |              | Area  |         |         | 2.0  | GM      | 11.2      | 16.4  | **          | %         | 4.3     | 11.9 | 15.2 | 6.0  | ** |
|       |           |                  |              | Total |         |         | 1.4  | Control | 4.0       | 14.0  | **          |           |         |      |      |      |    |
| 784.5 | PE 40:9   | PE 20:4/20:5     |              | Area  |         |         | 1.1  | GM      | 6.0       | 13.3  |             | %         | 14.9    | 6.5  | 19.5 | 20.4 | *  |
|       |           | PE 18:3/22:6     |              | Area  |         |         | 2.8  | GM      | 22.4      | 14.2  | **          | %         | 85.1    | 93.5 | 3.4  | 1.4  | *  |
|       |           |                  |              | Total |         |         | 2.5  | GM      | 19.6      | 12.9  | **          |           |         |      |      |      |    |
| 786.5 | PE 40:8   | PE 20:4/20:4     | PE 20:3/20:5 | Area  |         |         | 3.1  | GM      | 18.4      | 25.6  | *           | %         | 6.7     | 11.4 | 26.0 | 15.1 | *  |
|       |           | PE 18:2/22:6     |              | Area  |         |         | 1.7  | GM      | 12.3      | 10.7  | **          | %         | 93.3    | 88.6 | 1.9  | 2.0  | *  |
|       |           |                  |              | Total |         |         | 1.8  | GM      | 10.5      | 12.2  | **          |           |         |      |      |      |    |
| 788.5 | PE 40:7   | PE 20:2/20:5     |              | Area  |         |         | 1.4  | GM      | 3.4       | 21.8  |             | %         | 4.5     | 7.2  | 16.6 | 8.4  | ** |
|       |           | PE 18:1/22:6     |              | Area  |         |         | 1.2  | Control | 18.7      | 13.8  |             | %         | 95.5    | 92.8 | 0.8  | 0.7  | ** |
|       |           |                  |              | Total |         |         | 1.2  | Control | 18.0      | 14.3  |             |           |         |      |      |      |    |
| 792.6 | PE 40:5   | PE 20:4/20:1     | PE 18:1/22:4 | Area  |         |         | 1.0  | GM      | 31.5      | 25.5  |             | %         | 37.6    | 26.4 | 8.3  | 11.6 | *  |
|       |           | PE 18:0/22:5     |              | Area  |         |         | 1.7  | GM      | 23.3      | 20.0  | *           | %         | 62.4    | 73.6 | 5.0  | 4.2  | *  |
|       |           |                  |              | Total |         |         | 1.4  | GM      | 25.9      | 20.7  |             |           |         |      |      |      |    |
| 810.5 | PE 42:10  | PE 20:4/22:6 (a) |              | Area  |         |         | 2.7  | GM      | 22.6      | 11.5  | **          | %         | 62.6    | 63.3 | 7.1  | 2.7  |    |
|       |           | PE 20:4/22:6 (b) |              | Area  |         |         | 2.6  | GM      | 13.0      | 16.5  | **          | %         | 37.4    | 36.7 | 11.9 | 4.7  |    |
|       |           |                  |              | Total |         |         | 2.7  | GM      | 17.6      | 13.0  | **          | Ratio a/b | 1.7     | 1.7  | 19.4 | 7.3  |    |
| 814.5 | PE 42:8   | PE 20:2/22:6 (a) |              | Area  |         |         | 1.5  | GM      | 29.7      | 19.4  |             | %         | 86.9    | 86.1 | 2.2  | 1.3  |    |
|       |           | PE 20:2/22:6 (b) |              | Area  |         |         | 1.5  | GM      | 45.2      | 22.7  |             | %         | 13.1    | 13.9 | 14.3 | 8.2  |    |
|       |           |                  |              | Total |         |         | 1.5  | GM      | 31.8      | 19.6  | Ratio a/b   | 6.7       | 6.2     | 16.5 | 9.1  |      |    |
| 818.6 | PE 42:6   | PE 20:1/22:5     |              | Area  |         |         | 1.4  | GM      | 20.4      | 37.7  |             | %         | 19.5    | 23.0 | 16.4 | 19.7 |    |
|       |           | PE 20:0/22:6     |              | Area  |         |         | 1.1  | GM      | 29.3      | 14.0  |             | %         | 80.5    | 77.0 | 4.0  | 5.9  |    |
|       |           |                  |              | Total |         |         | 1.1  | GM      | 26.5      | 18.7  |             |           |         |      |      |      |    |
| 822.5 | PC 36:6   | PC 18:3/18:3     |              | Area  |         |         | 4.8  | GM      | 15.6      | 19.0  | **          | %         | 4.5     | 44.5 | 16.1 | 30.0 | ** |
|       |           | PC 16:1/20:5     |              | Area  |         |         | 4.4  | Control | 36.5      | 34.5  | *           | %         | 42.2    | 20.1 | 10.3 | 20.0 | ** |
|       |           | PC 14:0/22:6     |              | Area  |         |         | 3.0  | Control | 26.2      | 41.8  | *           | %         | 53.3    | 35.4 | 7.0  | 26.8 | *  |
|       |           |                  |              | Total |         |         | 2.1  | Control | 29.8      | 13.9  | *           |           |         |      |      |      |    |
| 826.6 | PC 36:4   | PC 18:2/18:2     | PC 16:1/20:3 | Area  |         |         | 1.3  | GM      | 4.2       | 9.6   | *           | %         | 12.4    | 7.9  | 5.0  | 7.2  | ** |
|       |           | PC 18:1/18:3     |              | Area  |         |         | 1.3  | GM      | 6.1       | 16.2  |             | %         | 26.6    | 16.3 | 3.2  | 2.7  | ** |
|       |           | PC 16:0/20:4 (a) |              | Area  |         |         | 1.4  | GM      | 8.2       | 9.7   | *           | %         | 9.4     | 6.2  | 3.4  | 4.1  | ** |
|       |           | PC 16:0/20:4 (b) |              | Area  |         |         | 2.9  | GM      | 4.7       | 14.1  | **          | %         | 51.6    | 69.6 | 0.7  | 0.9  | ** |
|       |           |                  |              | total |         |         | 2.1  | GM      | 4.7       | 13.7  | **          | Ratio b/a | 5.5     | 11.2 | 3.5  | 4.5  | ** |
| 828.6 | PC 36:3   | PC 18:1/18:2     |              | Area  |         |         | 1.8  | Control | 3.9       | 14.6  | **          | %         | 62.8    | 31.4 | 2.1  | 12.5 | ** |
|       |           | PC 16:0/20:3 (a) |              | Area  |         |         | 3.7  | GM      | 20.9      | 46.8  |             | %         | 5.6     | 17.6 | 14.8 | 37.1 | *  |
|       |           | PC 16:0/20:3 (c) |              | Area  |         |         | 1.5  | GM      | 14.1      | 9.4   | *           | %         | 25.2    | 34.0 | 8.2  | 13.5 | *  |
|       |           | PC 18:0/18:3     |              | Area  |         |         | 3.1  | GM      | 27.8      | 23.4  | **          | %         | 6.4     | 17.0 | 30.9 | 10.8 | ** |
|       |           |                  |              | total |         |         | 1.2  | GM      | 5.9       | 14.3  | Ratio c/a   | 4.6       | 2.2     | 6.4  | 41.9 | *    |    |
| 830.6 | PC 36:2   | PC 18:1/18:1     |              | Area  |         |         | 1.6  | Control | 10.5      | 12.4  | **          | %         | 68.5    | 44.8 | 3.1  | 10.3 | ** |
|       |           | PC 16:0/20:2 (a) | PC 18:0/18:2 | Area  |         |         | 1.4  | GM      | 13.4      | 12.9  | *           | %         | 11.0    | 15.2 | 13.8 | 9.2  | ** |
|       |           | PC 16:0/20:2 (b) |              | Area  |         |         | 1.9  | GM      | 16.9      | 15.9  | *           | %         | 20.6    | 40.0 | 6.2  | 8.5  | ** |
|       |           | Total            |              |       | 1.0     | Control | 11.0 | 9.8     | Ratio b/a | 1.9   | 2.6         | 13.4      | 5.0     | *    |      |      |    |
| 836.6 | PC O-38:6 | PC P-18:0/20:5   |              | Area  |         |         | 2.2  | Control | 11.6      | 14.5  | **          | %         | 68.0    | 52.5 | 9.8  | 2.4  | *  |
|       |           | PC O-16:0/22:6   |              | Area  |         |         | 1.2  | Control | 31.3      | 18.4  |             | %         | 32.0    | 47.5 | 20.7 | 2.7  | *  |
|       |           |                  |              | Total |         |         | 1.7  | Control | 14.1      | 16.3  | *           |           |         |      |      |      |    |
| 854.6 | PC 38:4   | PC 16:0/22:4     |              | Area  |         |         | 2.4  | GM      | 20.5      | 3.8   | **          | %         | 14.4    | 16.4 | 11.6 | 14.4 |    |
|       |           | PC 18:0/20:4     |              | Area  |         |         | 2.1  | GM      | 14.6      | 22.3  | *           | %         | 85.6    | 83.6 | 2.0  | 2.8  |    |
|       |           |                  |              | Total |         |         | 2.2  | GM      | 15.0      | 19.3  | *           |           |         |      |      |      |    |
| 872.5 | PC 40:9   | PC 20:4/20:5     |              | Area  |         |         | 1.5  | GM      | 33.6      | 8.1   |             | %         | 31.8    | 17.9 | 6.6  | 12.2 | ** |
|       |           | PC 18:3/22:6     |              | Area  |         |         | 3.3  | GM      | 28.4      | 7.1   | **          | %         | 68.2    | 82.1 | 3.0  | 2.6  | ** |
|       |           |                  |              | Total |         |         | 2.7  | GM      | 29.8      | 4.4   | **          |           |         |      |      |      |    |
| 874.6 | PC 40:8   | PC 18:3/22:5     |              | Area  |         |         | 3.4  | GM      | 38.3      | 9.6   | **          | %         | 9.7     | 16.3 | 44.0 | 15.6 |    |
|       |           | PC 20:4/20:4     | PC 20:5/20:3 | Area  |         |         | 2.9  | GM      | 15.1      | 21.0  | **          | %         | 17.8    | 25.3 | 17.3 | 8.8  | *  |
|       |           | PC 18:2/22:6     |              | Area  |         |         | 1.6  | GM      | 34.5      | 26.2  |             | %         | 72.5    | 58.4 | 8.5  | 4.7  | *  |
|       |           |                  |              | Total |         |         | 2.0  | GM      | 28.5      | 21.4  | *           | Ratio a/b | 1.1     | 0.8  | 7.65 | 7.15 | ** |
| 876.6 | PC 40:7   | PC 18:2/22:5     |              | Area  |         |         | 2.1  | GM      | 34.3      | 21.6  | *           | %         | 6.7     | 15.7 | 16.3 | 0.8  | ** |
|       |           | PC 20:5/20:2     |              | Area  |         |         | 1.7  | GM      | 28.0      | 20.6  |             | %         | 6.8     | 13.1 | 12.0 | 8.3  | ** |
|       |           | PC 18:1/22:6 (a) |              | Area  |         |         | 1.1  | GM      | 34.9      | 15.8  |             | %         | 27.4    | 33.3 | 15.8 | 10.5 |    |
|       |           | PC 18:1/22:6 (b) |              | Area  |         |         | 1.7  | Control | 19.2      | 32.0  |             | %         | 59.1    | 37.9 | 8.3  | 11.7 | ** |
|       |           |                  |              | Total |         |         | 1.1  | Control | 23.0      | 22.2  | Ratio b/a   | 2.2       | 1.2     | 23.5 | 22.1 | *    |    |
| 880.6 | PC 40:5   | PC 18:0/22:5     | C20:1/20:4   | Area  |         |         | 1.1  | GM      | 23.0      | 23.0  |             | %         | 64.2    | 53.7 | 3.4  | 6.9  | *  |
|       |           | PC 20:0/20:5     |              | Area  |         |         | 1.7  | GM      | 32.7      | 12.5  | *           | %         | 35.8    | 46.3 | 6.2  | 8.0  | *  |
|       |           |                  |              | Total |         |         | 1.3  | GM      | 26.53     | 17.71 |             |           |         |      |      |      |    |
| 898.6 | PC 42:10  | PC 20:5/22:5     |              | Area  |         |         | 1.9  | GM      | 55.3      | 21.6  |             | %         | 20.2    | 16.3 | 31.2 | 21.4 |    |
|       |           | PC 20:4/22:6 (a) |              | Area  |         |         | 2.3  | GM      | 30.6      | 26.7  | *           | %         | 41.0    | 36.4 | 6.6  | 7.5  | *  |
|       |           | PC 20:4/22:6 (b) |              | Area  |         |         | 3.2  | GM      | 33.1      | 26.1  | *           | %         | 38.8    | 47.3 | 10.5 | 3.0  | *  |
|       |           |                  |              | Total |         |         | 2.5  | GM      | 35.2      | 23.2  | * Ratio a/b | 1.1       | 0.8     | 7.65 | 7.15 | **   |    |

Supplementary Table S14. LC-MS/MS data for eye tissue at the intermediate timepoint. Green and red represent high and low absolute peak areas, respectively.  $p < 0.01 = **$ ,  $p = 0.01-0.05 = *$ . Stars with a red background denote falling below the Benjamini-Hochberg critical value.

| MW    | Simple ID | ID1              | ID2              |       | Control | GM | Fold | Highest | RSD% | RSD% | P  |           | Control | GM   | RSD% | RSD% | P  |
|-------|-----------|------------------|------------------|-------|---------|----|------|---------|------|------|----|-----------|---------|------|------|------|----|
| 742.5 | PE 36:2   | PE 18:1/18:1     |                  | Area  |         |    | 3.5  | Control | 17.3 | 26.3 | ** | %         | 91.4    | 78.6 | 1.5  | 8.8  | *  |
|       |           | PE 18:0/18:2     |                  | Area  |         |    | 1.2  | Control | 4.6  | 11.7 | *  | %         | 8.6     | 21.4 | 15.8 | 32.4 | *  |
|       |           |                  |                  | Total |         |    | 3.0  | Control | 15.8 | 18.7 | ** |           |         |      |      |      |    |
| 748.5 | PE O-38:6 | PE P-18:1/20:4   |                  | Area  |         |    | 1.3  | GM      | 10.6 | 6.0  | *  | %         | 61.8    | 72.7 | 12.7 | 1.3  |    |
|       |           | PE P-18:0/20:5   |                  | Area  |         |    | 1.3  | Control | 25.1 | 5.9  |    | %         | 38.2    | 27.3 | 20.6 | 3.3  |    |
|       |           |                  |                  | Total |         |    | 1.1  | GM      | 7.4  | 5.7  |    |           |         |      |      |      |    |
| 762.6 | PE 38:6   | PE 18:2/20:4     |                  | Area  |         |    | 3.5  | GM      | 9.8  | 23.7 | ** | %         | 3.7     | 20.6 | 23.6 | 13.9 | ** |
|       |           | PE 18:1/20:5     |                  | Area  |         |    | 4.4  | Control | 9.0  | 14.4 | ** | %         | 31.0    | 11.7 | 7.9  | 15.3 | ** |
|       |           | PE 16:0/22:6     |                  | Area  |         |    | 1.6  | Control | 16.8 | 9.5  | *  | %         | 65.4    | 67.7 | 4.7  | 5.4  |    |
|       |           |                  |                  | Total |         |    | 1.6  | Control | 12.7 | 10.5 | ** |           |         |      |      |      |    |
| 764.5 | PE 38:5   | PE 18:1/20:4     | PE 16:0/22:5     | Area  |         |    | 1.0  | GM      | 15.4 | 9.9  |    | %         | 42.1    | 54.3 | 13.9 | 6.9  | *  |
|       |           | PE 18:0/20:5     |                  | Area  |         |    | 1.6  | Control | 21.1 | 11.3 | *  | %         | 57.9    | 45.7 | 10.1 | 8.2  | *  |
|       |           |                  |                  | Total |         |    | 1.3  | Control | 14.0 | 7.5  |    |           |         |      |      |      |    |
| 776.6 | PC 32:1   | PC 16:0/16:1 (a) | PC 14:0/18:1     | Area  |         |    | 2.2  | Control | 16.7 | 19.6 | ** | %         | 66.0    | 57.5 | 4.0  | 2.4  | ** |
|       |           | PC 16:0/16:1 (b) |                  | Area  |         |    | 1.8  | Control | 19.3 | 15.0 | *  | %         | 27.2    | 28.3 | 4.0  | 4.5  |    |
|       |           | PC 16:1/16:0 (c) |                  | Area  |         |    | 1.1  | GM      | 29.4 | 22.1 |    | %         | 6.8     | 14.2 | 40.1 | 4.5  | ** |
|       |           |                  |                  | Total |         |    | 1.9  | Control | 15.4 | 18.6 | *  |           |         |      |      |      |    |
| 794.6 | PE 40:4   | PE 18:0/22:4     |                  | Area  |         |    | 1.6  | GM      | 6.8  | 10.9 | ** | %         | 78.2    | 72.7 | 14.4 | 10.1 |    |
|       |           | PE 20:0/20:4     |                  | Area  |         |    | 2.1  | GM      | 55.4 | 26.0 |    | %         | 21.8    | 27.3 | 51.7 | 26.9 |    |
|       |           |                  |                  | Total |         |    | 1.7  | GM      | 7.3  | 0.9  | ** |           |         |      |      |      |    |
| 810.5 | PE 42:10  | PE 20:4/22:6 (a) |                  | Area  |         |    | 1.2  | GM      | 23.7 | 20.3 |    | %         | 59.4    | 57.2 | 7.7  | 3.8  |    |
|       |           | PE 20:4/22:6 (b) |                  | Area  |         |    | 1.4  | GM      | 17.6 | 18.6 |    | %         | 40.6    | 42.8 | 11.3 | 5.1  |    |
|       |           |                  |                  | Total |         |    | 1.3  | GM      | 19.7 | 19.2 |    | Ratio a/b | 1.5     | 1.3  | 19.2 | 8.9  |    |
| 818.6 | PE 42:6   | PE 20:1/22:5     |                  | Area  |         |    | 1.6  | Control | 14.2 | 29.4 | *  | %         | 14.1    | 12.2 | 6.2  | 16.3 |    |
|       |           | PE 20:0/22:6     |                  | Area  |         |    | 1.4  | Control | 9.2  | 19.2 | *  | %         | 85.9    | 87.8 | 1.0  | 2.3  |    |
|       |           |                  |                  | Total |         |    | 1.4  | Control | 9.8  | 20.0 | *  |           |         |      |      |      |    |
| 822.5 | PC 36:6   | PC 16:1/20:5 (a) |                  | Area  |         |    | 3.2  | Control | 17.8 | 19.0 | ** | %         | 26.9    | 24.4 | 12.4 | 14.2 |    |
|       |           | PC 16:1/20:5 (b) |                  | Area  |         |    | 2.2  | Control | 36.5 | 33.8 |    | %         | 13.8    | 19.9 | 25.0 | 45.4 |    |
|       |           | PC 14:0/22:6     |                  | Area  |         |    | 3.1  | Control | 22.5 | 28.1 | ** | %         | 59.3    | 55.6 | 10.1 | 18.0 |    |
|       |           |                  |                  | Total |         |    | 3.0  | Control | 20.2 | 12.1 | ** | Ratio a/b | 2.0     | 1.4  | 24.5 | 53.0 |    |
| 826.6 | PC 36:4   | PC 18:2/18:2     |                  | Area  |         |    | 1.4  | Control | 4.8  | 20.5 | *  | %         | 16.1    | 6.5  | 12.3 | 12.6 | ** |
|       |           | PC 18:1/18:3     |                  | Area  |         |    | 1.8  | Control | 21.5 | 23.0 | *  | %         | 31.7    | 10.3 | 10.4 | 15.4 | ** |
|       |           | PC 16:0/20:4 (a) |                  | Area  |         |    | 1.4  | GM      | 20.4 | 13.3 |    | %         | 7.8     | 6.3  | 29.4 | 3.3  |    |
|       |           | PC 16:0/20:4 (b) |                  | Area  |         |    | 2.9  | GM      | 22.4 | 8.0  | ** | %         | 44.5    | 76.9 | 5.5  | 2.4  | ** |
|       |           |                  |                  | Total |         |    | 1.7  | GM      | 16.8 | 10.1 | ** | Ratio b/a | 6.0     | 12.2 | 27.0 | 5.6  | ** |
| 830.6 | PC 36:2   | PC 18:1/18:1     |                  | Area  |         |    | 3.7  | Control | 1.3  | 16.7 | ** | %         | 70.5    | 34.5 | 5.3  | 12.2 | ** |
|       |           | PC 16:0/20:2 (a) |                  | Area  |         |    | 1.4  | Control | 20.8 | 19.7 |    | %         | 12.5    | 15.6 | 16.7 | 6.7  |    |
|       |           | PC 18:0/18:2     | PC 16:0/20:2 (b) | Area  |         |    | 1.6  | GM      | 15.2 | 13.2 | *  | %         | 17.0    | 49.9 | 10.9 | 8.4  | ** |
|       |           |                  |                  | Total |         |    | 1.8  | Control | 4.2  | 12.7 | ** | Ratio b/a | 1.4     | 3.2  | 10.9 | 11.1 | ** |
| 852.6 | PC 38:5   | PC 16:0/22:5     | PC 18:1/20:4     | Area  |         |    | 1.1  | GM      | 15.2 | 11.6 |    | %         | 58.5    | 58.7 | 4.8  | 3.4  |    |
|       |           | PC 18:0/20:5     |                  | Area  |         |    | 1.1  | GM      | 20.8 | 8.6  |    | %         | 41.5    | 41.3 | 6.8  | 4.8  |    |
|       |           |                  |                  | Total |         |    | 1.1  | GM      | 16.9 | 9.6  |    |           |         |      |      |      |    |
| 854.6 | PC 38:4   | PC 18:0/20:4 (a) | PC 16:0/22:4     | Area  |         |    | 3.6  | GM      | 25.2 | 25.5 | ** | %         | 11.6    | 17.4 | 12.3 | 10.2 | *  |
|       |           | PC 18:0/20:4 (b) |                  | Area  |         |    | 2.2  | GM      | 14.8 | 14.0 | ** | %         | 88.4    | 82.6 | 1.6  | 2.1  | *  |
|       |           |                  |                  | Total |         |    | 2.4  | GM      | 15.8 | 16.0 | ** | Ratio b/a | 7.7     | 4.8  | 14.9 | 12.2 | *  |
| 872.5 | PC 40:9   | PC 20:4/20:5     |                  | Area  |         |    | 1.7  | GM      | 34.1 | 27.4 |    | %         | 16.0    | 22.6 | 11.4 | 24.8 |    |
|       |           | PC 18:3/22:6     |                  | Area  |         |    | 1.2  | GM      | 27.0 | 25.4 |    | %         | 84.0    | 77.4 | 2.2  | 7.2  |    |
|       |           |                  |                  | Total |         |    | 1.3  | GM      | 27.9 | 22.2 |    |           |         |      |      |      | ** |
| 874.6 | PC 40:8   | PC 18:3/22:5     |                  | Area  |         |    | 2.9  | GM      | 19.9 | 10.5 | ** | %         | 3.9     | 10.0 | 26.4 | 17.5 | ** |
|       |           | PC 20:4/20:4     | PC 20:3/20:5     | Area  |         |    | 2.5  | GM      | 9.7  | 6.1  | ** | %         | 12.0    | 27.1 | 14.7 | 7.8  | ** |
|       |           | PC 18:2/22:6     |                  | Area  |         |    | 1.2  | Control | 14.7 | 17.6 |    | %         | 84.1    | 62.9 | 2.6  | 5.5  | ** |
|       |           |                  |                  | Total |         |    | 1.1  | GM      | 12.2 | 12.6 |    |           |         |      |      |      |    |
| 876.6 | PC 40:7   | PC 18:2/22:5     |                  | Area  |         |    | 1.8  | GM      | 31.9 | 9.8  | *  | %         | 3.5     | 14.6 | 35.0 | 19.6 | ** |
|       |           | PC 20:2/20:5     |                  | Area  |         |    | 1.9  | GM      | 3.5  | 26.4 | *  | %         | 3.7     | 16.6 | 5.5  | 17.0 | ** |
|       |           | PC 18:1/22:6 (a) |                  | Area  |         |    | 2.3  | Control | 8.7  | 11.4 | ** | %         | 35.1    | 36.3 | 8.7  | 8.8  |    |
|       |           | PC 18:1/22:6 (b) |                  | Area  |         |    | 4.2  | Control | 11.1 | 22.7 | ** | %         | 57.7    | 32.5 | 4.2  | 10.1 | ** |
|       |           |                  |                  | Total |         |    | 2.4  | Control | 7.4  | 12.8 | ** | Ratio b/a | 1.7     | 0.9  | 12.3 | 18.5 | ** |
| 882.6 | PC 40:4   | PC 20:3/20:1     |                  | Area  |         |    | N/A  | GM      | 0.0  | 36.2 | ** | %         | 0.0     | 40.9 | 0.0  | 9.4  | ** |
|       |           | PC 20:0/20:4     |                  | Area  |         |    | N/A  | GM      | 0.0  | 37.9 | *  | %         | 0.0     | 59.1 | 0.0  | 6.5  | ** |
|       |           |                  |                  | Total |         |    | N/A  | GM      | 0.0  | 36.6 | ** |           |         |      |      |      |    |
| 898.6 | PC 42:10  | PC 20:5/22:5     |                  | Area  |         |    | 2.4  | GM      | 41.3 | 31.0 | *  | %         | 12.3    | 14.0 | 48.4 | 27.8 |    |
|       |           | PC 20:4/22:6 (a) |                  | Area  |         |    | 1.2  | GM      | 33.8 | 11.5 |    | %         | 46.4    | 28.5 | 11.2 | 13.4 | ** |
|       |           | PC 20:4/22:6 (b) |                  | Area  |         |    | 2.7  | GM      | 23.5 | 3.0  | ** | %         | 41.3    | 57.5 | 4.1  | 2.9  | ** |
|       |           |                  |                  | Total |         |    | 2.0  | GM      | 22.7 | 3.6  | ** | Ratio a/b | 1.1     | 0.5  | 10.4 | 14.2 | ** |
| 900.6 | PC 42:9   | PC 20:4/22:5     |                  | Area  |         |    | 6.9  | GM      | 19.9 | 17.4 | ** | %         | 16.9    | 38.1 | 51.9 | 6.2  | *  |
|       |           | PC 20:3/22:6     |                  | Area  |         |    | 1.9  | GM      | 55.1 | 7.9  |    | %         | 83.1    | 61.9 | 10.6 | 3.8  | *  |
|       |           |                  |                  | Total |         |    | 2.6  | GM      | 49.3 | 11.4 | ** |           |         |      |      |      |    |

Supplementary Table S15. LC-MS/MS data for gill tissue at the final timepoint. Green and red represent high and low absolute peak areas, respectively.  $p < 0.01 = **$ ,  $p = 0.01-0.05 = *$ . Stars with a red background denote falling below the Benjamini-Hochberg critical value.

| MW    | Simple ID | ID1              | ID2              |       | Control | GM | Fold | Highest | RSD% | RSD% | P  |           | Control | GM    | RSD% | RSD% | P  |
|-------|-----------|------------------|------------------|-------|---------|----|------|---------|------|------|----|-----------|---------|-------|------|------|----|
| 746.5 | PE O-38:7 | PE P-18:1/20:5   |                  | Area  |         |    | 3.1  | Control | 47.7 | 18.3 |    | %         | 61.8    | 42.5  | 9.6  | 20.0 | *  |
|       |           | PE P-16:0/22:6   |                  | Area  |         |    | 1.3  | Control | 28.7 | 18.5 |    | %         | 38.2    | 57.5  | 15.5 | 14.7 | *  |
|       |           |                  |                  | Total |         |    | 2.1  | Control | 40.7 | 7.7  |    |           |         |       |      |      |    |
| 748.5 | PC 30:1   | PC 14:0/16:1 (a) |                  | Area  |         |    | 4.3  | Control | 12.1 | 42.2 | ** | %         | 69.4    | 100.0 | 8.5  | 0.0  | ** |
|       |           | PC 14:0/16:1 (b) |                  | Area  |         |    | N/A  | Control | 34.8 | 0.0  | *  | %         | 30.6    | 0.0   | 19.3 | 0.0  | ** |
|       |           |                  |                  | Total |         |    | 9.4  | Control | 18.7 | 97.5 | ** |           | 2.4     | 0     | 29.6 | 0    | *  |
| 762.5 | PE 38:6   | PE 18:1/20:5     |                  | Area  |         |    | 5.1  | Control | 16.8 | 47.7 | ** | %         | 21.0    | 7.5   | 12.4 | 47.9 | ** |
|       |           | PE 16:0/22:6     |                  | Area  |         |    | 1.5  | Control | 24.2 | 15.1 |    | %         | 79.0    | 92.5  | 3.3  | 3.9  | ** |
|       |           |                  |                  | Total |         |    | 1.8  | Control | 22.0 | 13.2 | *  |           |         |       |      |      |    |
| 764.5 | PE 38:5   | PE 16:0/22:5     | PE 18:1/20:4     | Area  |         |    | 1.7  | Control | 13.8 | 3.1  | ** | %         | 56.4    | 58.4  | 13.4 | 6.7  |    |
|       |           | PE 18:0/20:5     |                  | Area  |         |    | 1.9  | Control | 37.4 | 14.4 |    | %         | 43.6    | 41.6  | 17.3 | 9.4  |    |
|       |           |                  |                  | Total |         |    | 1.7  | Control | 22.1 | 5.5  | *  |           |         |       |      |      |    |
| 774.5 | PE O-40:7 | PE P-18:1/22:5   |                  | Area  |         |    | 2.9  | Control | 37.9 | 21.9 | *  | %         | 30.5    | 15.9  | 10.5 | 34.0 | *  |
|       |           | PE P-18:0/22:6   |                  | Area  |         |    | 1.2  | Control | 41.4 | 19.7 |    | %         | 69.5    | 84.1  | 4.6  | 6.4  | *  |
|       |           |                  |                  | Total |         |    | 1.5  | Control | 40.0 | 13.9 |    |           |         |       |      |      |    |
| 776.5 | PC 32:1   | PC 16:0/16:1 (a) | PC 14:0/18:1     | Area  |         |    | 2.7  | Control | 8.2  | 16.9 | ** | %         | 70.0    | 44.4  | 2.6  | 5.7  | ** |
|       |           | PC 16:0/16:1 (b) |                  | Area  |         |    | 1.0  | GM      | 6.4  | 8.0  |    | %         | 25.5    | 43.4  | 4.0  | 6.1  | ** |
|       |           | PC 16:0/16:1 (c) | PC 14:0/18:1     | Area  |         |    | 1.6  | GM      | 14.6 | 9.7  | ** | %         | 4.5     | 12.2  | 18.8 | 8.8  | ** |
|       |           |                  |                  | Total |         |    | 1.7  | Control | 6.5  | 11.2 | ** |           |         |       |      |      |    |
| 822.5 | PC 36:6   | PC 16:1/20:5     |                  | Area  |         |    | 4.1  | Control | 28.6 | 61.0 | *  | %         | 30.6    | 25.9  | 7.2  | 13.4 |    |
|       |           | PC 14:0/22:6     |                  | Area  |         |    | 3.3  | Control | 24.9 | 46.0 | *  | %         | 69.4    | 74.1  | 3.2  | 4.7  |    |
|       |           |                  |                  | Total |         |    | 3.5  | Control | 25.6 | 49.8 | *  |           |         |       |      |      |    |
| 826.6 | PC 36:4   | PC 18:2/18:2     |                  | Area  |         |    | 1.3  | Control | 46.6 | 11.6 |    | %         | 6.7     | 3.4   | 43.1 | 17.4 |    |
|       |           | PC 18:1/18:3     |                  | Area  |         |    | 1.4  | GM      | 20.3 | 23.3 |    | %         | 16.6    | 14.4  | 19.2 | 13.5 |    |
|       |           | PC 16:0/20:4 (a) |                  | Area  |         |    | 1.1  | GM      | 9.7  | 24.3 |    | %         | 9.1     | 6.2   | 13.1 | 10.0 | *  |
|       |           | PC 16:0/20:4 (b) |                  | Area  |         |    | 1.7  | GM      | 15.5 | 13.1 | ** | %         | 67.6    | 76.0  | 8.1  | 3.4  |    |
|       |           |                  |                  | Total |         |    | 1.6  | GM      | 10.9 | 14.1 | *  | Ratio b/a | 7.5     | 12.3  | 12.6 | 12.3 | ** |
| 830.6 | PC 36:2   | PC 18:1/18:1     |                  | Area  |         |    | 3.0  | Control | 21.9 | 19.8 | ** | %         | 70.5    | 39.7  | 4.4  | 5.8  | ** |
|       |           | PC 16:0/20:2 (a) |                  | Area  |         |    | 1.1  | GM      | 6.0  | 9.8  |    | %         | 8.2     | 15.3  | 11.8 | 7.6  | ** |
|       |           | PC 18:0/18:2     | PC 16:0/20:2 (b) | Area  |         |    | 1.3  | GM      | 8.0  | 10.6 | *  | %         | 21.3    | 44.9  | 10.2 | 3.3  | ** |
|       |           |                  |                  | Total |         |    | 1.7  | Control | 17.5 | 14.0 | *  | Ratio b/a | 2.6     | 2.9   | 5.6  | 6.3  |    |
| 836.6 | PC O-38:6 | PC P-18:0/20:5   |                  | Area  |         |    | 2.8  | Control | 26.3 | 34.9 | *  | %         | 36.7    | 24.1  | 18.2 | 25.4 |    |
|       |           | PC O-16:0/22:6   |                  | Area  |         |    | 1.6  | Control | 1.4  | 14.4 | ** | %         | 63.3    | 75.9  | 10.5 | 8.1  |    |
|       |           |                  |                  | Total |         |    | 1.9  | Control | 9.2  | 17.0 | ** |           |         |       |      |      |    |
| 850.6 | PC 38:6   | PC 18:1/20:5     |                  | Area  |         |    | 3.1  | Control | 25.8 | 50.2 | *  | %         | 19.4    | 7.7   | 11.9 | 42.4 | ** |
|       |           | PC 16:0/22:6     |                  | Area  |         |    | 1.1  | Control | 10.9 | 5.1  |    | %         | 80.6    | 92.3  | 2.9  | 3.5  | ** |
|       |           |                  |                  | Total |         |    | 1.3  | Control | 13.7 | 8.1  |    |           |         |       |      |      |    |
| 854.6 | PC 38:4   | PC 18:1/20:3     |                  | Area  |         |    | 1.9  | Control | 18.5 | 7.8  | *  | %         | 14.2    | 4.9   | 20.3 | 17.8 | ** |
|       |           | PC 16:0/22:4     |                  | Area  |         |    | 1.7  | GM      | 21.4 | 21.0 | *  | %         | 16.8    | 19.0  | 17.3 | 8.4  |    |
|       |           | PC 18:0/20:4     |                  | Area  |         |    | 1.7  | GM      | 7.9  | 12.1 | ** | %         | 69.1    | 76.1  | 6.2  | 1.7  |    |
|       |           |                  |                  | Total |         |    | 1.5  | GM      | 5.7  | 12.9 | *  |           |         |       |      |      |    |
| 876.6 | PC 40:7   | PC 18:1/22:6 (a) |                  | Area  |         |    | 1.6  | Control | 21.3 | 19.7 |    | %         | 31.6    | 49.9  | 29.4 | 18.5 |    |
|       |           | PC 18:1/22:6 (b) |                  | Area  |         |    | 3.2  | Control | 23.0 | 49.1 | *  | %         | 68.4    | 50.1  | 13.6 | 18.5 |    |
|       |           |                  |                  | Total |         |    | 2.4  | Control | 9.6  | 32.2 | ** | Ratio b/a | 2.4     | 1.0   | 47.0 | 36.2 |    |

Supplementary Table S16. LC-MS/MS data for gill tissue at the intermediate timepoint. Green and red represent high and low absolute peak areas, respectively.  $p < 0.01 = **$ ,  $p = 0.01-0.05 = *$ . Stars with a red background denote falling below the Benjamini-Hochberg critical value.

| MW    | Simple ID | ID1              | ID2          |       | Control | GM | Fold | Highest | RSD% | RSD%  | P  |           | Control | GM   | RSD% | RSD%  | P  |
|-------|-----------|------------------|--------------|-------|---------|----|------|---------|------|-------|----|-----------|---------|------|------|-------|----|
| 748.5 | PC 30:1   | PC 14:0/16:1 (a) |              | Area  | Control |    | 5.1  | Control | 37.4 | 19.7  | *  | %         | 35.1    | 34.7 | 10.8 | 19.3  |    |
|       |           | PC 14:0/16:1 (b) |              | Area  |         |    | 4.8  | Control | 37.5 | 30.6  | *  | %         | 40.0    | 41.1 | 16.5 | 6.1   |    |
|       |           | PC 14:1/16:0     |              | Area  |         |    | 4.9  | Control | 28.2 | 36.5  | ** | %         | 24.9    | 24.2 | 17.2 | 27.6  |    |
|       |           |                  |              | Total |         |    | 4.9  | Control | 31.3 | 24.3  | *  | Ratio a/b | 0.9     | 0.8  | 26.1 | 21.5  |    |
| 776.5 | PC 32:1   | PC 16:0/16:1 (a) | PC 14:0/18:1 | Area  |         |    | 2.9  | Control | 2.1  | 18.7  | ** | %         | 50.8    | 38.5 | 2.0  | 6.8   | ** |
|       |           | PC 16:0/16:1 (b) |              | Area  |         |    | 1.8  | Control | 5.8  | 26.1  | ** | %         | 36.9    | 45.2 | 3.4  | 3.1   | ** |
|       |           | PC 16:0/16:1 (c) |              | Area  |         |    | 2.3  | GM      | 24.2 | 34.2  |    | %         | 2.7     | 13.4 | 21.7 | 13.7  | ** |
|       |           | PC 16:0/16:1 (d) |              | Area  |         |    | 7.1  | Control | 16.1 | 36.4  | ** | %         | 9.5     | 2.9  | 15.0 | 14.7  | ** |
|       |           |                  |              | Total |         |    | 2.2  | Control | 4.0  | 24.3  | ** |           |         |      |      |       |    |
| 790.5 | PC 33:1   | PC 16:0/17:1 (a) | PC 15:0/18:1 | Area  |         |    | 2.6  | Control | 9.8  | 22.8  | ** | %         | 71.8    | 67.3 | 7.7  | 10.4  |    |
|       |           | PC 16:0/17:1 (b) |              | Area  |         |    | 2.1  | Control | 28.8 | 32.5  |    | %         | 28.2    | 32.7 | 19.6 | 21.4  |    |
|       |           |                  |              | total |         |    | 2.4  | Control | 11.7 | 22.7  | ** | Ratio a/b | 2.6     | 2.1  | 25.0 | 30.6  |    |
| 802.6 | PC 34:2   | PC 16:1/18:1     |              | Area  |         |    | 6.3  | Control | 14.6 | 5.5   | ** | %         | 15.7    | 3.3  | 21.4 | 11.6  | ** |
|       |           | PC 16:0/18:2 (a) |              | Area  |         |    | 1.4  | Control | 12.1 | 15.3  | *  | %         | 79.6    | 76.7 | 4.0  | 3.8   |    |
|       |           | PC 16:0/18:2 (b) |              | Area  |         |    | 3.2  | GM      | 13.6 | 22.5  | ** | %         | 4.7     | 20.0 | 5.6  | 15.1  | ** |
|       |           |                  |              | Total |         |    | 1.3  | Control | 8.5  | 14.5  | *  | Ratio a/b | 17.0    | 3.9  | 4.0  | 19.1  | ** |
| 822.5 | PC 36:6   | PC 16:1/20:5     |              | Area  |         |    | 10.1 | Control | 22.1 | 173.2 | ** | %         | 19.6    | 33.3 | 7.9  | 173.2 |    |
|       |           | PC 14:0/22:6     |              | Area  |         |    | 6.2  | Control | 15.8 | 99.6  | ** | %         | 80.4    | 66.7 | 1.9  | 86.6  |    |
|       |           |                  |              | total |         |    | 6.7  | Control | 16.8 | 67.8  | ** |           |         |      |      |       |    |
| 826.6 | PC 36:4   | PC 18:2/18:2     |              | Area  |         |    | 1.3  | Control | 28.1 | 34.7  |    | %         | 12.3    | 6.4  | 17.7 | 23.0  | *  |
|       |           | PC 18:1/18:3     |              | Area  |         |    | 1.9  | Control | 10.5 | 34.6  | *  | %         | 26.8    | 9.3  | 4.7  | 15.8  | ** |
|       |           | PC 16:0/20:4     |              | Area  |         |    | 2.0  | GM      | 15.8 | 19.9  | *  | %         | 60.9    | 84.3 | 3.7  | 2.5   | ** |
|       |           |                  |              | Total |         |    | 1.5  | GM      | 14.8 | 21.5  |    |           |         |      |      |       |    |
| 828.6 | PC 36:3   | PC 18:1/18:2     |              | Area  |         |    | 2.6  | Control | 7.9  | 27.1  | ** | %         | 79.1    | 50.6 | 3.0  | 6.2   | ** |
|       |           | PC 16:0/20:3 (a) |              | Area  |         |    | 1.1  | Control | 15.9 | 35.1  |    | %         | 19.9    | 31.1 | 11.1 | 17.2  | *  |
|       |           | PC 16:0/20:3 (b) |              | Area  |         |    | 11.4 | GM      | 19.9 | 22.4  | ** | %         | 1.0     | 18.3 | 18.2 | 13.3  | ** |
|       |           |                  |              | Total |         |    | 1.6  | Control | 8.3  | 26.7  | *  | Ratio a/b | 20.7    | 1.7  | 8.5  | 27.9  | ** |
| 830.6 | PC 36:2   | PC 18:1/18:1     |              | Area  |         |    | 5.6  | Control | 10.9 | 17.1  | ** | %         | 66.3    | 30.9 | 6.2  | 10.5  | ** |
|       |           | PC 16:0/20:2 (a) |              | Area  |         |    | 1.7  | Control | 11.5 | 36.6  | *  | %         | 12.0    | 17.6 | 15.7 | 17.9  |    |
|       |           | PC 16:0/20:2 (b) | PC 18:0/18:2 | Area  |         |    | 1.1  | Control | 7.5  | 24.5  |    | %         | 21.7    | 51.5 | 10.2 | 9.1   | ** |
|       |           |                  |              | Total |         |    | 2.6  | Control | 5.7  | 22.3  | ** | Ratio b/a | 1.8     | 3.0  | 5.7  | 23.8  | *  |
| 850.6 | PC 38:6   | PC 18:2/20:4     |              | Area  |         |    | N/A  | GM      | 0.0  | 13.7  | ** | %         | 0.0     | 7.3  | 0.0  | 6.7   | ** |
|       |           | PC 18:1/20:5     |              | Area  |         |    | 4.3  | Control | 7.1  | 17.3  | ** | %         | 20.2    | 8.0  | 11.6 | 2.0   | ** |
|       |           | PC 16:0/22:6     |              | Area  |         |    | 1.6  | Control | 11.8 | 17.8  | *  | %         | 79.8    | 84.7 | 2.9  | 0.7   | *  |
|       |           |                  |              | Total |         |    | 1.7  | Control | 9.4  | 17.3  | ** |           |         |      |      |       |    |
| 854.6 | PC 38:4   | PC 16:0/22:4     |              | Area  |         |    | 3.5  | GM      | 17.0 | 27.0  | *  | %         | 15.4    | 30.8 | 30.5 | 8.9   | ** |
|       |           | PC 18:0/20:4     |              | Area  |         |    | 1.4  | GM      | 23.6 | 24.4  |    | %         | 84.6    | 69.2 | 5.6  | 4.0   | ** |
|       |           |                  |              | total |         |    | 1.7  | GM      | 17.8 | 24.2  |    |           |         |      |      |       |    |
| 876.6 | PC 40:7   | PC 18:1/22:6 (a) |              | Area  |         |    | 3.2  | Control | 13.4 | 40.7  | ** | %         | 36.4    | 45.2 | 5.7  | 15.0  |    |
|       |           | PC 18:1/22:6 (b) |              | Area  |         |    | 4.8  | Control | 11.2 | 18.0  | ** | %         | 63.6    | 54.8 | 3.3  | 12.3  |    |
|       |           |                  |              | total |         |    | 4.0  | Control | 11.3 | 28.5  | ** | Ratio b/a | 1.8     | 1.2  | 9.1  | 29.2  |    |

Supplementary Table S17. LC-MS/MS data for intestine tissue at the final timepoint. Green and red represent high and low absolute peak areas, respectively.  $p < 0.01 = **$ ,  $p = 0.01-0.05 = *$ . Stars with a red background denote falling below the Benjamini-Hochberg critical value.



| MW    | Simple ID | ID1              | ID2          |       | Control | GM | Fold | Higest  | RSD% | RSD% | P  |           | Control | GM   | RSD% | RSD% | P  |
|-------|-----------|------------------|--------------|-------|---------|----|------|---------|------|------|----|-----------|---------|------|------|------|----|
| 734.5 | PE 36:6   | PE 16:1/20:5     |              | Area  |         |    | N/A  | Control | 38.1 | 0.0  | *  | %         | 39.2    | 0.0  | 21.9 | 0.0  | ** |
|       |           | PE 14:0/22:6     |              | Area  |         |    | N/A  | Control | 44.5 | 0.0  | *  | %         | 60.8    | 0.0  | 14.1 | 0.0  | ** |
|       |           |                  |              | total |         |    | N/A  | Control | 38.8 | 0.0  | *  |           |         |      |      |      |    |
| 740.5 | PE 36:3   | PE 18:1/18:2     |              | Area  |         |    | 3.0  | Control | 40.1 | 18.4 | *  | %         | 71.9    | 50.9 | 5.7  | 11.6 | ** |
|       |           | PE 16:0/20:3     |              | Area  |         |    | 1.1  | Control | 25.5 | 42.2 |    | %         | 28.1    | 49.1 | 14.7 | 12.0 | ** |
|       |           |                  |              | total |         |    | 2.0  | Control | 35.2 | 30.1 |    |           |         |      |      |      |    |
| 742.5 | PE 36:2   | PE 18:1/18:1     |              | Area  |         |    | 13.7 | Control | 36.6 | 56.4 | *  | %         | 64.3    | 18.3 | 8.7  | 37.6 | ** |
|       |           | PE 18:0/18:2 (a) |              | Area  |         |    | 7.0  | Control | 15.6 | 34.9 | ** | %         | 21.5    | 12.4 | 20.1 | 44.5 | ** |
|       |           | PE 18:0/18:2 (b) |              | Area  |         |    | 1.3  | GM      | 20.9 | 17.1 |    | %         | 14.2    | 69.3 | 15.2 | 2.0  | ** |
|       |           |                  |              | Total |         |    | 4.0  | Control | 29.2 | 18.8 | *  | Ratio a/b | 1.5     | 0.2  | 18.2 | 43.1 | ** |
| 760.5 | PE 38:7   | PE 18:2/20:5     |              | Area  |         |    | 1.5  | Control | 28.5 | 22.6 |    | %         | 80.6    | 94.9 | 4.1  | 2.3  | ** |
|       |           | PE 16:1/22:6     |              | Area  |         |    | 7.0  | Control | 47.0 | 48.5 | *  | %         | 19.4    | 5.1  | 17.2 | 42.6 | ** |
|       |           |                  |              | total |         |    | 1.8  | Control | 31.9 | 21.9 |    |           |         |      |      |      |    |
| 762.5 | PE 38:6   | PE 18:2/20:4     |              | Area  |         |    | 2.1  | GM      | 35.0 | 11.1 | ** | %         | 2.9     | 9.9  | 12.0 | 11.3 | ** |
|       |           | PE 18:1/20:5     |              | Area  |         |    | 5.9  | Control | 28.6 | 22.5 | ** | %         | 37.3    | 9.9  | 6.5  | 12.6 | ** |
|       |           | PE 16:0/22:6     |              | Area  |         |    | 1.2  | Control | 22.5 | 16.8 |    | %         | 59.9    | 80.3 | 4.6  | 2.5  | ** |
|       |           |                  |              | Total |         |    | 1.6  | Control | 24.8 | 15.9 |    |           |         |      |      |      |    |
| 764.5 | PE 38:5   | PE 16:0/22:5     | PE 18:1/20:4 | Area  |         |    | 1.2  | Control | 20.6 | 23.8 |    | %         | 34.1    | 37.4 | 3.8  | 4.1  | *  |
|       |           | PE 18:0/20:5     |              | Area  |         |    | 1.4  | Control | 22.5 | 18.3 |    | %         | 65.9    | 62.6 | 2.0  | 2.5  | *  |
|       |           |                  |              | total |         |    | 1.3  | Control | 21.8 | 20.3 |    |           |         |      |      |      |    |
| 765.5 | PG 36:6   | PG 16:1/20:5     |              | Area  |         |    | N/A  | Control | 26.3 | 0.0  | ** | %         | 49.8    | 0.0  | 18.2 | 0.0  | ** |
|       |           | PG 14:0/22:6     |              | Area  |         |    | N/A  | Control | 30.1 | 0.0  | ** | %         | 50.2    | 0.0  | 18.0 | 0.0  | ** |
|       |           |                  |              | total |         |    | N/A  | Control | 22.1 | 0.0  | ** |           |         |      |      |      |    |
| 766.5 | PE 38:4   | PE 16:0/22:4     |              | Area  |         |    | 2.2  | GM      | 23.0 | 28.8 | *  | %         | 11.1    | 11.2 | 12.3 | 17.0 |    |
|       |           | PE 18:0/20:4     |              | Area  |         |    | 2.1  | GM      | 9.5  | 11.9 | ** | %         | 88.9    | 88.8 | 1.5  | 2.2  |    |
|       |           |                  |              | total |         |    | 2.2  | GM      | 11.0 | 13.8 | ** |           |         |      |      |      |    |
| 788.5 | PE 40:7   | PE 18:2/22:5     |              | Area  |         |    | 1.1  | GM      | 53.2 | 30.1 |    | %         | 6.4     | 18.4 | 20.2 | 10.5 | ** |
|       |           | PE 20:2/20:5     |              | Area  |         |    | 1.3  | Control | 18.2 | 34.0 |    | %         | 5.5     | 10.2 | 22.8 | 22.9 | *  |
|       |           | PE 18:1/22:6     |              | Area  |         |    | 3.1  | Control | 31.2 | 18.5 | *  | %         | 88.1    | 71.4 | 1.3  | 5.4  | ** |
|       |           |                  |              | Total |         |    | 2.5  | Control | 31.8 | 21.3 | *  |           |         |      |      |      |    |
| 790.5 | PE 40:6   | PE 18:1/22:5     |              | Area  |         |    | 2.6  | Control | 30.4 | 32.0 | *  | %         | 13.7    | 5.2  | 7.3  | 15.1 | ** |
|       |           | PE 18:0/22:6     |              | Area  |         |    | 1.1  | GM      | 22.5 | 18.3 |    | %         | 86.3    | 94.8 | 1.2  | 0.8  | ** |
|       |           |                  |              | total |         |    | 1.0  | Control | 23.6 | 19.1 |    |           |         |      |      |      |    |
| 793.5 | PG 38:6   | PG 18:1/20:5     |              | Area  |         |    | 3.6  | Control | 22.1 | 36.4 | ** | %         | 42.4    | 15.7 | 10.0 | 16.2 | ** |
|       |           | PG 16:0/22:6     |              | Area  |         |    | 1.1  | GM      | 9.8  | 18.1 |    | %         | 57.6    | 84.3 | 7.3  | 3.0  | ** |
|       |           |                  |              | total |         |    | 1.4  | Control | 13.6 | 20.9 |    |           |         |      |      |      |    |
| 794.6 | PE 40:4   | PE 18:0/22:4     |              | Area  |         |    | 2.8  | GM      | 34.9 | 15.3 | ** | %         | 65.3    | 57.6 | 8.5  | 5.3  |    |
|       |           | PE 20:0/20:4     |              | Area  |         |    | 3.9  | GM      | 37.6 | 17.8 | ** | %         | 34.7    | 42.4 | 16.0 | 7.2  |    |
|       |           |                  |              | total |         |    | 3.1  | GM      | 34.1 | 15.0 | ** |           |         |      |      |      |    |
| 798.5 | PC 34:4   | PC 16:1/18:3     |              | Area  |         |    | 2.2  | Control | 33.8 | 11.2 |    | %         | 59.2    | 54.0 | 16.6 | 73.7 |    |
|       |           | PC 16:0/18:4     |              | Area  |         |    | 1.0  | Control | 24.9 | 89.8 |    | %         | 40.8    | 46.0 | 24.1 | 86.7 |    |
|       |           |                  |              | total |         |    | 1.5  | Control | 25.4 | 51.4 |    |           |         |      |      |      |    |
| 802.6 | PC 34:2   | PC 16:1/18:1     |              | Area  |         |    | 7.7  | Control | 19.4 | 58.8 | ** | %         | 19.7    | 3.4  | 4.9  | 51.8 | ** |
|       |           | PC 16:0/18:2     |              | Area  |         |    | 1.1  | Control | 14.7 | 20.9 |    | %         | 80.3    | 96.6 | 1.2  | 1.8  | ** |
|       |           |                  |              | total |         |    | 1.4  | Control | 15.6 | 21.8 |    |           |         |      |      |      |    |
| 818.6 | PE 42:6   | PE 20:1/22:5     |              | Area  |         |    | 1.0  | Control | 27.0 | 21.5 |    | %         | 39.3    | 24.9 | 4.4  | 5.9  | ** |
|       |           | PE 20:0/22:6     |              | Area  |         |    | 2.0  | GM      | 19.2 | 22.1 | *  | %         | 60.7    | 75.1 | 2.8  | 2.0  | ** |
|       |           |                  |              | total |         |    | 1.6  | GM      | 22.3 | 21.6 |    |           |         |      |      |      |    |
| 820.6 | PE 42:5   | PE 20:1/22:4     |              | Area  |         |    | 2.0  | GM      | 32.3 | 28.3 |    | %         | 69.1    | 59.4 | 6.9  | 4.7  | *  |
|       |           | PE 20:0/22:5     |              | Area  |         |    | 3.1  | GM      | 12.7 | 19.5 | ** | %         | 30.9    | 40.6 | 15.5 | 6.9  | *  |
|       |           |                  |              | total |         |    | 2.3  | GM      | 26.4 | 24.7 | *  |           |         |      |      |      |    |
| 822.5 | PC 36:6   | PC 18:3/18:3     |              | Area  |         |    | 4.3  | GM      | 29.7 | 44.6 | *  | %         | 4.5     | 53.9 | 11.7 | 18.1 | ** |
|       |           | PC 16:1/20:5     |              | Area  |         |    | 7.2  | Control | 35.4 | 65.0 | *  | %         | 46.2    | 17.4 | 4.6  | 17.6 | ** |
|       |           | PC 14:0/22:6     |              | Area  |         |    | 4.8  | Control | 34.7 | 63.4 | *  | %         | 49.4    | 28.7 | 3.4  | 24.6 | ** |
|       |           |                  |              | Total |         |    | 2.8  | Control | 34.6 | 50.0 | *  |           |         |      |      |      |    |
| 824.5 | PC 36:5   | PC 18:2/18:3     |              | Area  |         |    | 2.0  | GM      | 30.0 | 28.4 |    | %         | 5.8     | 13.9 | 24.3 | 5.2  | ** |
|       |           | PC 16:0/20:5     |              | Area  |         |    | 1.3  | Control | 25.1 | 26.7 |    | %         | 94.2    | 86.1 | 1.5  | 0.8  | ** |
|       |           |                  |              | total |         |    | 1.2  | Control | 24.8 | 26.9 |    |           |         |      |      |      |    |
| 826.6 | PC 36:4   | PC 18:2/18:2     |              | Area  |         |    | 1.0  | Control | 21.2 | 25.3 |    | %         | 20.4    | 14.5 | 1.0  | 4.7  | ** |
|       |           | PC 18:1/18:3     |              | Area  |         |    | 1.5  | Control | 26.2 | 37.9 |    | %         | 42.2    | 20.4 | 7.5  | 16.0 | ** |
|       |           | PC 16:0/20:4 (a) |              | Area  |         |    | 1.0  | GM      | 16.3 | 15.9 |    | %         | 16.1    | 12.2 | 5.0  | 9.4  | ** |
|       |           | PC 16:0/20:4 (b) |              | Area  |         |    | 3.3  | GM      | 16.4 | 20.3 | ** | %         | 21.3    | 52.8 | 14.2 | 4.5  | ** |
|       |           |                  |              | Total |         |    | 1.3  | GM      | 20.7 | 24.1 |    | Ratio b/a | 1.3     | 4.3  | 13.1 | 4.9  | ** |
| 828.6 | PC 36:3   | PC 18:1/18:2     |              | Area  |         |    | 2.9  | Control | 15.0 | 36.8 | ** | %         | 61.3    | 28.1 | 4.5  | 9.7  | ** |
|       |           | PC 16:0/20:3 (a) |              | Area  |         |    | 1.2  | GM      | 20.2 | 19.8 |    | %         | 34.4    | 58.3 | 6.4  | 9.8  | ** |
|       |           | PC 16:0/20:3 (b) |              | Area  |         |    | 2.5  | GM      | 19.3 | 49.7 |    | %         | 4.3     | 13.7 | 17.5 | 31.0 | *  |
|       |           |                  |              | Total |         |    | 1.4  | Control | 15.9 | 28.5 |    | Ratio a/b | 8.2     | 4.7  | 13.8 | 47.3 |    |

|       |          |                  |              |       |  |  |     |         |      |      |    |           |      |      |      |      |    |
|-------|----------|------------------|--------------|-------|--|--|-----|---------|------|------|----|-----------|------|------|------|------|----|
| 830.6 | PC 36:2  | PC 18:1/18:1     |              | Area  |  |  | 6.1 | Control | 17.3 | 40.7 | ** | %         | 71.6 | 28.6 | 1.7  | 18.3 | ** |
|       |          | PC 16:0/20:2     |              | Area  |  |  | 1.4 | Control | 11.4 | 5.8  | *  | %         | 9.6  | 17.5 | 18.9 | 28.4 |    |
|       |          | PC 18:0/18:2     |              | Area  |  |  | 1.1 | GM      | 22.7 | 23.8 |    | %         | 18.8 | 53.9 | 5.7  | 1.3  | ** |
|       |          |                  |              | Total |  |  | 2.5 | Control | 17.0 | 24.0 | ** |           |      |      |      |      |    |
| 846.5 | PC 38:8  | PC 18:3/20:5     |              | Area  |  |  | 1.5 | GM      | 38.8 | 43.3 |    | %         | 89.4 | 94.0 | 4.0  | 1.2  |    |
|       |          | PC 16:2/22:6     |              | Area  |  |  | 1.1 | Control | 28.3 | 54.5 |    | %         | 10.6 | 6.0  | 34.3 | 18.3 |    |
|       |          |                  |              | total |  |  | 1.5 | GM      | 36.7 | 43.9 |    |           |      |      |      |      |    |
| 850.6 | PC 38:6  | PC 18:3/20:3     |              | Area  |  |  | 2.0 | GM      | 31.4 | 14.5 | *  | %         | 2.1  | 5.1  | 16.5 | 10.3 | *  |
|       |          | PC 18:2/20:4     |              | Area  |  |  | 4.2 | GM      | 54.2 | 48.7 |    | %         | 1.2  | 6.3  | 32.0 | 41.0 | *  |
|       |          | PC 18:1/20:5     |              | Area  |  |  | 3.4 | Control | 29.6 | 39.7 | *  | %         | 34.4 | 12.1 | 7.1  | 18.4 | ** |
|       |          | PC 16:0/22:6     |              | Area  |  |  | 1.0 | GM      | 20.8 | 20.3 |    | %         | 62.3 | 76.5 | 5.0  | 4.9  | ** |
|       |          |                  |              | Total |  |  | 1.2 | Control | 24.2 | 22.9 |    |           |      |      |      |      |    |
| 854.6 | PC 38:4  | PC 18:1/20:3     |              | Area  |  |  | 1.1 | GM      | 12.2 | 33.0 |    | %         | 42.5 | 24.3 | 8.4  | 10.0 | ** |
|       |          | PC 16:0/22:4     |              | Area  |  |  | 2.1 | GM      | 15.6 | 15.4 | ** | %         | 17.1 | 19.8 | 3.5  | 11.8 |    |
|       |          | PC 18:0/20:4     |              | Area  |  |  | 2.6 | GM      | 28.7 | 25.8 | *  | %         | 40.3 | 55.9 | 9.8  | 2.9  | ** |
|       |          |                  |              | Total |  |  | 1.9 | GM      | 18.9 | 25.3 | *  |           |      |      |      |      |    |
| 872.5 | PC 40:9  | PC 20:4/20:5     |              | Area  |  |  | 1.2 | Control | 33.2 | 22.2 |    | %         | 32.4 | 16.6 | 17.9 | 8.5  | *  |
|       |          | PC 18:3/22:6     |              | Area  |  |  | 2.1 | GM      | 21.5 | 25.7 | *  | %         | 67.6 | 83.4 | 8.6  | 1.7  | *  |
|       |          |                  |              | total |  |  | 1.7 | GM      | 23.6 | 24.8 |    |           |      |      |      |      |    |
| 874.6 | PC 40:8  | PC 18:3/22:5     |              | Area  |  |  | 2.0 | GM      | 19.8 | 23.6 | *  | %         | 14.2 | 20.4 | 5.8  | 7.2  | ** |
|       |          | PC 20:3/20:5     |              | Area  |  |  | 2.1 | GM      | 8.1  | 39.7 |    | %         | 16.3 | 22.2 | 20.2 | 15.0 |    |
|       |          | PC 18:2/22:6 (a) |              | Area  |  |  | 1.1 | GM      | 28.0 | 26.9 |    | %         | 68.5 | 52.5 | 5.4  | 5.6  | ** |
|       |          | PC 18:2/22:6 (b) |              | Area  |  |  | 7.8 | GM      | 54.2 | 31.1 | ** | %         | 0.9  | 4.9  | 42.7 | 11.6 | ** |
|       |          |                  |              | Total |  |  | 1.4 | GM      | 22.5 | 28.7 |    | Ratio a/b | 90.5 | 10.8 | 53.7 | 16.0 | *  |
| 876.6 | PC 40:7  | PC 18:2/22:5     |              | Area  |  |  | 1.3 | GM      | 32.0 | 23.8 |    | %         | 12.1 | 28.4 | 7.6  | 20.1 | ** |
|       |          | PC 20:2/20:5     |              | Area  |  |  | 1.5 | GM      | 24.0 | 30.7 |    | %         | 5.3  | 13.6 | 8.9  | 11.5 | ** |
|       |          | PC 18:1/22:6     |              | Area  |  |  | 2.5 | Control | 29.4 | 31.8 | *  | %         | 82.6 | 57.9 | 1.5  | 7.7  | ** |
|       |          |                  |              | Total |  |  | 1.7 | Control | 29.3 | 25.8 |    |           |      |      |      |      |    |
| 878.6 | PC 40:6  | PC 18:1/22:5     |              | Area  |  |  | 3.1 | Control | 21.1 | 35.3 | ** | %         | 29.6 | 8.7  | 2.2  | 11.9 | ** |
|       |          | PC 20:1/20:5     |              | Area  |  |  | 1.4 | GM      | 28.1 | 33.1 |    | %         | 16.8 | 21.2 | 5.7  | 10.6 | *  |
|       |          | PC 18:0/22:6     |              | Area  |  |  | 1.4 | GM      | 21.2 | 23.0 |    | %         | 53.7 | 70.1 | 1.8  | 4.2  | ** |
|       |          |                  |              | Total |  |  | 1.1 | GM      | 22.3 | 26.0 |    |           |      |      |      |      |    |
| 880.6 | PC 40:5  | PC 18:0/22:5     |              | Area  |  |  | 1.6 | GM      | 27.0 | 17.7 |    | %         | 80.4 | 76.6 | 4.9  | 6.3  |    |
|       |          | PC 20:0/20:5     | PC 20:1/20:4 | Area  |  |  | 2.0 | GM      | 45.3 | 39.8 |    | %         | 19.6 | 23.4 | 19.9 | 20.8 |    |
|       |          |                  |              | total |  |  | 1.7 | GM      | 30.0 | 22.8 |    |           |      |      |      |      |    |
| 882.6 | PC 40:4  | PC 18:0/22:4     | PC 20:1/20:3 | Area  |  |  | 2.6 | GM      | 39.8 | 12.3 | ** | %         | 67.3 | 56.4 | 4.8  | 9.5  | *  |
|       |          | PC 20:0/20:4     |              | Area  |  |  | 4.3 | GM      | 28.8 | 24.7 | ** | %         | 32.7 | 43.6 | 9.8  | 12.3 | *  |
|       |          |                  |              | total |  |  | 3.2 | GM      | 35.9 | 15.6 | ** |           |      |      |      |      |    |
| 898.6 | PC 42:10 | PC 20:5/22:5     |              | Area  |  |  | 1.1 | Control | 41.7 | 33.6 |    | %         | 45.3 | 30.2 | 21.5 | 9.7  |    |
|       |          | PC 20:4/22:6 (a) |              | Area  |  |  | 1.3 | GM      | 10.0 | 7.6  | *  | %         | 42.3 | 39.0 | 27.1 | 23.1 |    |
|       |          | PC 20:4/22:6 (b) |              | Area  |  |  | 3.5 | GM      | 34.0 | 42.4 | *  | %         | 12.4 | 30.8 | 14.4 | 19.8 | ** |
|       |          |                  |              | Total |  |  | 1.4 | GM      | 24.7 | 25.5 |    | Ratio a/b | 3.5  | 1.3  | 43.1 | 43.6 |    |
| 900.6 | PC 42:9  | PC 20:4/22:5     |              | Area  |  |  | 1.7 | GM      | 13.0 | 20.2 | *  | %         | 22.8 | 16.5 | 29.7 | 18.7 |    |
|       |          | PC 20:5/22:4     |              | Area  |  |  | 4.0 | GM      | 55.0 | 39.0 | *  | %         | 11.2 | 19.9 | 32.4 | 25.4 |    |
|       |          | PC 20:3/22:6     |              | Area  |  |  | 2.2 | GM      | 28.4 | 8.2  | ** | %         | 66.1 | 63.6 | 7.4  | 7.9  |    |
|       |          |                  |              | Total |  |  | 2.3 | GM      | 22.9 | 14.0 | ** |           |      |      |      |      |    |
| 906.6 | PC 42:6  | PC 20:2/22:4     |              | Area  |  |  | 1.0 | GM      | 17.0 | 18.9 |    | %         | 20.7 | 11.3 | 20.2 | 27.9 | *  |
|       |          | PC 20:1/22:5     |              | Area  |  |  | 1.2 | GM      | 42.3 | 23.2 |    | %         | 53.1 | 33.5 | 7.2  | 3.6  | ** |
|       |          | PC 20:0/22:6     |              | Area  |  |  | 3.9 | GM      | 38.9 | 26.0 | ** | %         | 26.3 | 55.2 | 2.9  | 4.6  | ** |
|       |          |                  |              | Total |  |  | 1.9 | GM      | 36.1 | 22.0 |    |           |      |      |      |      |    |

Supplementary Table S18. LC-MS/MS data for intestine tissue at the intermediate timepoint. Green and red represent high and low absolute peak areas, respectively.  $p < 0.01 = **$ ,  $p = 0.01-0.05 = *$ . Stars with a red background denote falling below the Benjamini-Hochberg critical value.

| MW    | Simple ID | ID1              | ID2          |       | Control | GM | Fold | Highest | RSD%  | RSD% | P  |           | Control | GM   | RSD%  | RSD% | P  |
|-------|-----------|------------------|--------------|-------|---------|----|------|---------|-------|------|----|-----------|---------|------|-------|------|----|
| 740.5 | PE 36:3   | PE 18:1/18:2     |              | Area  |         |    | 2.6  | Control | 18.2  | 48.8 | *  | %         | 77.4    | 52.3 | 2.8   | 8.6  | ** |
|       |           | PE 16:0/20:3     |              | Area  |         |    | 1.2  | GM      | 8.9   | 37.8 |    | %         | 22.6    | 47.7 | 9.5   | 9.4  | ** |
|       |           |                  |              | total |         |    | 1.8  | Control | 15.8  | 43.6 |    |           |         |      |       |      |    |
| 742.5 | PE 36:2   | PE 18:1/18:1     |              | Area  |         |    | 5.3  | Control | 19.2  | 59.5 | ** | %         | 71.2    | 27.8 | 8.1   | 29.3 | ** |
|       |           | PE 18:0/18:2     |              | Area  |         |    | 1.2  | GM      | 9.7   | 51.8 |    | %         | 28.8    | 72.2 | 20.0  | 11.3 | ** |
|       |           |                  |              | total |         |    | 2.2  | Control | 12.3  | 51.5 | *  |           |         |      |       |      |    |
| 762.5 | PE 38:6   | PE 18:2/20:4     |              | Area  |         |    | 1.1  | GM      | 124.3 | 36.4 |    | %         | 7.9     | 10.3 | 130.8 | 11.3 |    |
|       |           | PE 18:1/20:5     |              | Area  |         |    | 3.0  | Control | 87.9  | 52.7 |    | %         | 17.8    | 7.8  | 86.8  | 7.5  |    |
|       |           | PE 16:0/22:6     |              | Area  |         |    | 1.2  | Control | 16.3  | 45.8 |    | %         | 74.3    | 81.9 | 7.1   | 0.9  |    |
|       |           |                  |              | Total |         |    | 1.3  | Control | 17.9  | 45.3 |    |           |         |      |       |      |    |
| 766.5 | PE 38:4   | PE 18:1/20:3     |              | Area  |         |    | 2.0  | Control | 11.8  | 60.9 |    | %         | 16.9    | 2.3  | 6.2   | 23.2 | ** |
|       |           | PE 16:0/22:4     |              | Area  |         |    | 3.9  | GM      | 30.6  | 50.9 |    | %         | 8.1     | 8.7  | 22.6  | 10.7 |    |
|       |           | PE 18:0/20:4     |              | Area  |         |    | 4.2  | GM      | 11.4  | 39.8 | *  | %         | 75.0    | 89.0 | 1.1   | 1.6  | ** |
|       |           |                  |              | Total |         |    | 3.5  | GM      | 12.1  | 41.2 | *  |           |         |      |       |      |    |
| 768.5 | PE 38:3   | PE 18:2/20:1     |              | Area  |         |    | 1.8  | Control | 10.6  | 65.0 |    | %         | 61.5    | 39.8 | 7.5   | 17.4 | *  |
|       |           | PE 18:0/20:3     |              | Area  |         |    | 1.2  | GM      | 19.1  | 45.7 |    | %         | 38.5    | 60.2 | 11.9  | 11.6 | *  |
|       |           |                  |              | total |         |    | 1.2  | Control | 11.0  | 51.6 |    |           |         |      |       |      |    |
| 774.5 | PC 32:2   | PC 14:0/18:2     |              | Area  |         |    | 1.1  | GM      | 16.3  | 53.7 |    | %         | 43.2    | 78.1 | 6.6   | 5.9  | ** |
|       |           | PC 16:1/16:1     |              | Area  |         |    | 3.9  | Control | 26.8  | 76.0 | *  | %         | 56.8    | 21.9 | 5.0   | 21.2 | ** |
|       |           |                  |              | total |         |    | 1.6  | Control | 22.3  | 58.7 |    |           |         |      |       |      |    |
| 788.5 | PE 40:7   | PE 18:3/22:4     |              | Area  |         |    | 2.5  | GM      | 21.5  | 43.3 |    | %         | 1.8     | 10.4 | 17.9  | 8.8  | ** |
|       |           | PE 20:2/20:5     |              | Area  |         |    | 1.3  | Control | 39.1  | 52.6 |    | %         | 3.3     | 5.8  | 25.7  | 3.2  | ** |
|       |           | PE 18:1/22:6 (a) |              | Area  |         |    | 2.8  | Control | 13.8  | 53.7 | ** | %         | 93.4    | 76.5 | 0.9   | 0.6  | ** |
|       |           | PE 18:1/22:6 (b) |              | Area  |         |    | 2.2  | GM      | 19.9  | 62.1 |    | %         | 1.5     | 7.3  | 28.6  | 8.5  | ** |
|       |           |                  |              | Total |         |    | 2.3  | Control | 14.2  | 53.2 | *  | Ratio a/b | 65.5    | 10.5 | 33.8  | 7.8  | *  |
| 792.6 | PE 40:5   | PE 18:0/22:5 (a) | PE 20:1/20:4 | Area  |         |    | 2.3  | GM      | 15.2  | 48.1 |    | %         | 66.1    | 76.1 | 2.0   | 5.5  | *  |
|       |           | PE 20:0/20:5     |              | Area  |         |    | 1.9  | GM      | 19.2  | 63.1 |    | %         | 11.9    | 10.5 | 6.7   | 13.1 |    |
|       |           | PE 18:0/22:5 (b) |              | Area  |         |    | 1.3  | GM      | 4.3   | 68.8 |    | %         | 22.0    | 13.4 | 8.5   | 20.8 | *  |
|       |           |                  |              | Total |         |    | 2.0  | GM      | 13.2  | 52.7 |    | Ratio a/b | 3.0     | 5.9  | 10.8  | 28.1 | *  |
| 794.6 | PE 40:4   | PE 18:1/22:3     |              | Area  |         |    | 6.5  | GM      | 7.9   | 44.1 | *  | %         | 21.5    | 23.4 | 5.0   | 15.7 |    |
|       |           | PE 18:0/22:4     |              | Area  |         |    | 4.8  | GM      | 15.1  | 36.2 | *  | %         | 66.4    | 55.4 | 4.4   | 4.8  | ** |
|       |           | PE 20:0/20:4     |              | Area  |         |    | 10.4 | GM      | 7.7   | 38.7 | *  | %         | 12.1    | 21.2 | 17.5  | 5.5  | ** |
|       |           |                  |              | Total |         |    | 5.9  | GM      | 10.7  | 38.0 | *  |           |         |      |       |      |    |
| 802.6 | PC 34:2   | PC 16:0/18:2 (a) | PC 14:0/20:2 | Area  |         |    | 1.5  | Control | 5.2   | 47.4 |    | %         | 97.9    | 87.0 | 0.4   | 2.2  | ** |
|       |           | PC 16:0/18:2 (b) |              | Area  |         |    | 4.4  | GM      | 25.7  | 40.3 | *  | %         | 2.1     | 13.0 | 19.8  | 14.7 | ** |
|       |           |                  |              | total |         |    | 1.4  | Control | 5.6   | 46.1 |    | Ratio a/b | 47.4    | 6.8  | 19.0  | 16.4 | ** |
| 810.5 | PE 42:10  | PE 20:4/22:6 (a) |              | Area  |         |    | 1.7  | GM      | 21.2  | 44.6 |    | %         | 82.4    | 64.2 | 3.0   | 6.6  | ** |
|       |           | PE 20:4/22:6 (b) |              | Area  |         |    | 4.7  | GM      | 5.7   | 60.9 |    | %         | 17.6    | 35.8 | 13.9  | 11.8 | ** |
|       |           |                  |              | total |         |    | 2.2  | GM      | 18.1  | 50.6 |    | Ratio a/b | 4.8     | 1.8  | 18.2  | 18.9 | ** |
| 818.6 | PE 42:6   | PE 20:1/22:5     |              | Area  |         |    | 1.1  | Control | 18.7  | 63.6 |    | %         | 26.4    | 10.4 | 14.1  | 10.8 | ** |
|       |           | PE 20:0/22:6     |              | Area  |         |    | 2.8  | GM      | 8.7   | 63.4 |    | %         | 73.6    | 89.6 | 5.1   | 1.3  | ** |
|       |           |                  |              | total |         |    | 2.3  | GM      | 9.1   | 63.4 |    |           |         |      |       |      |    |
| 820.6 | PE 42:5   | PE 20:1/22:4     |              | Area  |         |    | 2.0  | GM      | 34.0  | 56.0 |    | %         | 84.3    | 74.1 | 10.4  | 2.1  |    |
|       |           | PE 20:0/22:5     |              | Area  |         |    | 4.3  | GM      | 29.5  | 62.5 |    | %         | 15.7    | 25.9 | 55.8  | 5.9  |    |
|       |           |                  |              | total |         |    | 2.3  | GM      | 25.4  | 57.7 |    |           |         |      |       |      |    |
| 822.5 | PC 36:6   | PC 16:1/20:5     |              | Area  |         |    | 2.4  | Control | 39.9  | 61.7 |    | %         | 26.0    | 26.8 | 19.5  | 8.0  | ** |
|       |           | PC 14:0/22:6     |              | Area  |         |    | 2.5  | Control | 14.2  | 55.8 | *  | %         | 74.0    | 73.2 | 6.9   | 2.9  |    |
|       |           |                  |              | total |         |    | 2.4  | Control | 21.1  | 57.4 | *  |           |         |      |       |      |    |
| 824.5 | PC 36:5   | PC 18:2/18:3     |              | Area  |         |    | 1.1  | GM      | 18.4  | 78.0 |    | %         | 6.6     | 5.4  | 9.6   | 33.3 |    |
|       |           | PC 16:0/20:5     |              | Area  |         |    | 1.2  | GM      | 16.3  | 45.3 |    | %         | 93.4    | 94.6 | 0.7   | 1.9  |    |
|       |           |                  |              | total |         |    | 1.2  | GM      | 16.3  | 46.9 |    |           |         |      |       |      |    |
| 826.6 | PC 36:4   | PC 18:2/18:2     |              | Area  |         |    | 1.5  | Control | 7.1   | 62.7 |    | %         | 32.5    | 13.4 | 11.2  | 15.3 | ** |
|       |           | PC 18:1/18:3     |              | Area  |         |    | 2.2  | Control | 30.5  | 62.0 |    | %         | 36.5    | 10.5 | 16.5  | 17.7 | ** |
|       |           | PC 16:0/20:4 (a) |              | Area  |         |    | 1.3  | GM      | 6.9   | 43.6 |    | %         | 7.8     | 6.3  | 9.8   | 16.2 |    |
|       |           | PC 16:0/20:4 (b) |              | Area  |         |    | 4.7  | GM      | 10.6  | 44.9 | *  | %         | 23.2    | 69.9 | 7.2   | 4.2  | ** |
|       |           |                  |              | Total |         |    | 1.6  | GM      | 16.2  | 48.5 |    | Ratio b/a | 3.0     | 11.3 | 4.8   | 11.8 | ** |

| 828.6 | PC 36:3  | PC 18:1/18:2     |              | Area  |  |  | 3.2  | Control | 12.7 | 47.9 | ** | %         | 70.3 | 36.2 | 6.6  | 2.1  | ** |  |  |
|-------|----------|------------------|--------------|-------|--|--|------|---------|------|------|----|-----------|------|------|------|------|----|--|--|
|       |          | PC 16:0/20:3 (a) |              | Area  |  |  | 1.2  | GM      | 17.2 | 44.2 |    | %         | 22.8 | 47.0 | 23.3 | 4.2  | ** |  |  |
|       |          | PC 16:0/20:3 (b) |              | Area  |  |  | 1.5  | GM      | 15.6 | 53.7 |    | %         | 6.9  | 16.7 | 10.7 | 7.9  | ** |  |  |
|       |          |                  |              | Total |  |  | 1.7  | Control | 6.9  | 47.0 |    | Ratio a/b | 3.4  | 2.8  | 33.8 | 11.9 |    |  |  |
|       |          |                  |              |       |  |  |      |         |      |      |    |           |      |      |      |      |    |  |  |
| 830.6 | PC 36:2  | PC 18:1/18:1     |              | Area  |  |  | 6.9  | Control | 21.3 | 37.8 | ** | %         | 59.5 | 16.6 | 10.7 | 13.1 | ** |  |  |
|       |          | PC 16:0/20:2     |              | Area  |  |  | 1.1  | Control | 4.7  | 53.8 |    | %         | 8.5  | 13.8 | 14.2 | 12.0 | *  |  |  |
|       |          | PC 18:0/18:2     |              | Area  |  |  | 1.2  | GM      | 9.1  | 42.3 |    | %         | 32.0 | 69.6 | 16.2 | 1.9  | ** |  |  |
|       |          |                  |              | Total |  |  | 1.9  | Control | 12.4 | 42.7 | *  |           |      |      |      |      |    |  |  |
|       |          |                  |              |       |  |  |      |         |      |      |    |           |      |      |      |      |    |  |  |
| 850.6 | PC 38:6  | PC 18:2/20:4     |              | Area  |  |  | 9.0  | GM      | 33.4 | 54.5 | *  | %         | 0.8  | 8.0  | 30.3 | 2.4  | ** |  |  |
|       |          | PC 18:1/20:5     |              | Area  |  |  | 1.6  | Control | 19.1 | 55.0 |    | %         | 16.0 | 10.8 | 16.2 | 8.8  | *  |  |  |
|       |          | PC 16:0/22:6     |              | Area  |  |  | 1.1  | Control | 7.3  | 51.4 |    | %         | 83.1 | 81.2 | 3.4  | 1.2  |    |  |  |
|       |          |                  |              | Total |  |  | 1.1  | Control | 7.5  | 52.0 |    |           |      |      |      |      |    |  |  |
|       |          |                  |              |       |  |  |      |         |      |      |    |           |      |      |      |      |    |  |  |
| 852.6 | PC 38:5  | PC 16:0/22:5 (a) | PC 18:1/20:4 | Area  |  |  | 1.3  | GM      | 10.0 | 40.3 |    | %         | 43.2 | 35.2 | 0.7  | 9.3  | *  |  |  |
|       |          | PC 18:0/20:5     |              | Area  |  |  | 2.0  | GM      | 12.1 | 43.7 |    | %         | 47.0 | 58.8 | 1.6  | 6.6  | ** |  |  |
|       |          | PC 16:0/22:5 (b) |              | Area  |  |  | 1.0  | Control | 8.8  | 46.9 |    | %         | 9.8  | 6.0  | 6.0  | 11.9 | ** |  |  |
|       |          |                  |              | Total |  |  | 1.6  | GM      | 10.7 | 42.2 |    | Ratio a/b | 4.4  | 5.9  | 5.7  | 6.4  | ** |  |  |
|       |          |                  |              |       |  |  |      |         |      |      |    |           |      |      |      |      |    |  |  |
| 854.6 | PC 38:4  | PC 18:2/20:2     |              | Area  |  |  | 1.9  | Control | 11.3 | 53.7 |    | %         | 26.9 | 6.9  | 3.7  | 17.5 | ** |  |  |
|       |          | PC 18:3/20:1     | PC 18:1/20:3 | Area  |  |  | 1.1  | Control | 5.6  | 49.4 |    | %         | 30.2 | 13.5 | 11.4 | 13.7 | ** |  |  |
|       |          | PC 18:0/20:4     |              | Area  |  |  | 3.8  | GM      | 17.3 | 42.8 | *  | %         | 42.9 | 79.6 | 7.1  | 1.6  | ** |  |  |
|       |          |                  |              | Total |  |  | 2.0  | GM      | 10.1 | 44.2 |    |           |      |      |      |      |    |  |  |
|       |          |                  |              |       |  |  |      |         |      |      |    |           |      |      |      |      |    |  |  |
| 856.5 | PC 38:3  | PC 18:2/20:1     | PC 18:1/20:2 | Area  |  |  | 2.0  | Control | 13.7 | 46.9 | *  | %         | 78.0 | 55.8 | 2.0  | 5.7  | ** |  |  |
|       |          | PC 18:0/20:3     |              | Area  |  |  | 1.4  | GM      | 13.1 | 59.1 |    | %         | 22.0 | 44.2 | 7.2  | 7.2  | ** |  |  |
|       |          |                  |              | total |  |  | 1.4  | Control | 13.1 | 52.4 |    |           |      |      |      |      |    |  |  |
|       |          |                  |              |       |  |  |      |         |      |      |    |           |      |      |      |      |    |  |  |
| 872.5 | PC 40:9  | PC 20:4/20:5     |              | Area  |  |  | 2.1  | GM      | 30.6 | 58.1 |    | %         | 15.8 | 23.3 | 21.0 | 6.3  | *  |  |  |
|       |          | PC 18:3/22:6     |              | Area  |  |  | 1.4  | GM      | 19.4 | 66.4 |    | %         | 84.2 | 76.7 | 3.9  | 1.9  | *  |  |  |
|       |          |                  |              | total |  |  | 1.5  | GM      | 19.3 | 64.5 |    |           |      |      |      |      |    |  |  |
|       |          |                  |              |       |  |  |      |         |      |      |    |           |      |      |      |      |    |  |  |
| 874.6 | PC 40:8  | PC 18:3/22:5     |              | Area  |  |  | 2.1  | GM      | 34.8 | 64.1 |    | %         | 4.8  | 7.5  | 21.7 | 1.6  | *  |  |  |
|       |          | PC 20:4/20:4     | C20:3/20:5   | Area  |  |  | 3.0  | GM      | 43.3 | 61.9 |    | %         | 10.1 | 22.9 | 29.8 | 1.4  | ** |  |  |
|       |          | PC 18:2/22:6     |              | Area  |  |  | 1.1  | GM      | 10.3 | 63.1 |    | %         | 85.1 | 69.6 | 4.7  | 0.5  | ** |  |  |
|       |          |                  |              | Total |  |  | 1.4  | GM      | 14.4 | 62.9 |    |           |      |      |      |      |    |  |  |
|       |          |                  |              |       |  |  |      |         |      |      |    |           |      |      |      |      |    |  |  |
| 876.6 | PC 40:7  | PC 18:2/22:5     |              | Area  |  |  | 1.8  | GM      | 9.0  | 53.1 |    | %         | 6.1  | 18.9 | 16.3 | 5.6  | ** |  |  |
|       |          | PC 20:2/20:5     |              | Area  |  |  | 1.8  | GM      | 39.2 | 42.5 |    | %         | 6.9  | 23.4 | 30.1 | 12.4 | ** |  |  |
|       |          | PC 18:1/22:6     |              | Area  |  |  | 2.6  | Control | 9.3  | 62.1 | *  | %         | 87.0 | 57.7 | 2.2  | 6.4  | ** |  |  |
|       |          |                  |              | Total |  |  | 1.7  | Control | 10.2 | 55.9 |    |           |      |      |      |      |    |  |  |
|       |          |                  |              |       |  |  |      |         |      |      |    |           |      |      |      |      |    |  |  |
| 880.6 | PC 40:5  | PC 18:0/22:5     | C16:0/24:5   | Area  |  |  | 2.2  | GM      | 15.9 | 47.7 |    | %         | 80.2 | 73.0 | 1.8  | 1.1  | ** |  |  |
|       |          | PC 20:0/20:5     |              | Area  |  |  | 3.4  | GM      | 15.1 | 48.2 |    | %         | 19.8 | 27.0 | 7.2  | 3.0  | ** |  |  |
|       |          |                  |              | total |  |  | 2.5  | GM      | 15.4 | 47.8 |    |           |      |      |      |      |    |  |  |
|       |          |                  |              |       |  |  |      |         |      |      |    |           |      |      |      |      |    |  |  |
| 882.6 | PC 40:4  | PC 20:1/20:3 (a) |              | Area  |  |  | 1.7  | Control | 12.3 | 60.6 |    | %         | 71.8 | 20.6 | 1.5  | 12.9 | ** |  |  |
|       |          | PC 20:1/20:3 (b) | PC 18:0/22:4 | Area  |  |  | 3.3  | GM      | 13.8 | 40.5 | *  | %         | 20.3 | 35.3 | 5.4  | 11.8 | ** |  |  |
|       |          | PC 20:0/20:4     |              | Area  |  |  | 11.6 | GM      | 7.5  | 58.7 |    | %         | 7.8  | 44.1 | 4.4  | 8.2  | ** |  |  |
|       |          |                  |              | Total |  |  | 2.0  | GM      | 12.0 | 52.6 |    | Ratio a/b | 3.5  | 0.6  | 6.8  | 22.5 | ** |  |  |
|       |          |                  |              |       |  |  |      |         |      |      |    |           |      |      |      |      |    |  |  |
| 898.6 | PC 42:10 | PC 20:5/22:5     |              | Area  |  |  | 2.5  | GM      | 38.5 | 40.1 |    | %         | 17.8 | 17.9 | 7.1  | 9.4  |    |  |  |
|       |          | PC 20:4/22:6 (a) |              | Area  |  |  | 1.6  | GM      | 29.6 | 56.9 |    | %         | 56.7 | 34.0 | 4.0  | 12.1 | ** |  |  |
|       |          | PC 20:4/22:6 (b) |              | Area  |  |  | 4.7  | GM      | 31.4 | 38.3 | *  | %         | 25.5 | 48.1 | 7.0  | 6.0  | ** |  |  |
|       |          |                  |              | Total |  |  | 2.5  | GM      | 31.4 | 45.1 |    | Ratio a/b | 2.2  | 0.7  | 10.3 | 18.2 | ** |  |  |
|       |          |                  |              |       |  |  |      |         |      |      |    |           |      |      |      |      |    |  |  |
| 900.6 | PC 42:9  | PC 20:4/22:5     |              | Area  |  |  | 4.7  | GM      | 15.7 | 41.9 | *  | %         | 11.2 | 33.8 | 35.9 | 24.7 | *  |  |  |
|       |          | PC 20:3/22:6     |              | Area  |  |  | 1.1  | GM      | 38.6 | 53.2 |    | %         | 88.8 | 66.2 | 4.6  | 12.6 | *  |  |  |
|       |          |                  |              | total |  |  | 1.5  | GM      | 33.9 | 48.0 |    |           |      |      |      |      |    |  |  |
|       |          |                  |              |       |  |  |      |         |      |      |    |           |      |      |      |      |    |  |  |
| 906.6 | PC 42:6  | PC 20:0/22:6 (a) |              | Area  |  |  | 1.1  | Control | 2.2  | 45.9 |    | %         | 38.8 | 26.8 | 3.6  | 23.7 | *  |  |  |
|       |          | PC 20:1/22:5     |              | Area  |  |  | 1.1  | Control | 21.1 | 63.8 |    | %         | 24.7 | 15.4 | 17.0 | 7.3  | ** |  |  |
|       |          | PC 20:0/22:6 (b) |              | Area  |  |  | 2.2  | GM      | 10.4 | 60.5 |    | %         | 36.5 | 57.8 | 10.6 | 10.9 | ** |  |  |
|       |          |                  |              | Total |  |  | 1.4  | GM      | 5.8  | 56.4 |    | Ratio b/a | 0.9  | 2.3  | 10.9 | 30.0 | ** |  |  |

Supplementary Table S19. LC-MS/MS data for liver tissue at the final timepoint. Green and red represent high and low absolute peak areas, respectively.  $p < 0.01 = **$ ,  $p = 0.01-0.05 = *$ . Stars with a red background denote falling below the Benjamini-Hochberg critical value.

| MW    | Simple ID | ID1              | ID2              |       | Control | GM | Fold | Highest | RSD% | RSD% | P  |           | Control | GM   | RSD% | RSD% | P  |
|-------|-----------|------------------|------------------|-------|---------|----|------|---------|------|------|----|-----------|---------|------|------|------|----|
| 742.5 | PE 36:2   | PE 18:1/18:1     |                  | Area  |         |    | 8.7  | Control | 10.7 | 37.1 | ** | %         | 76.7    | 29.2 | 2.3  | 23.7 | ** |
|       |           | PE 18:0/18:2     |                  | Area  |         |    | 1.1  | Control | 1.7  | 25.0 |    | %         | 23.3    | 70.8 | 7.6  | 9.8  | ** |
|       |           |                  |                  | total |         |    | 3.3  | Control | 8.4  | 24.7 | ** |           |         |      |      |      |    |
| 762.5 | PE 38:6   | PE 18:2/20:4     |                  | Area  |         |    | 3.8  | GM      | 36.7 | 4.2  | ** | %         | 4.4     | 23.6 | 5.4  | 19.6 | ** |
|       |           | PE 18:1/20:5     | PE 18:2/20:4     | Area  |         |    | 2.7  | Control | 32.8 | 44.4 | *  | %         | 40.4    | 19.6 | 8.4  | 24.4 | ** |
|       |           | PE 16:0/22:6     |                  | Area  |         |    | 1.3  | Control | 32.9 | 22.4 |    | %         | 55.2    | 56.8 | 5.8  | 5.4  |    |
|       |           |                  |                  | Total |         |    | 1.4  | Control | 32.5 | 21.7 |    |           |         |      |      |      |    |
| 764.5 | PE 38:5   | PE 18:1/20:4     | PE 16:0/22:5     | Area  |         |    | 1.4  | GM      | 24.5 | 22.4 |    | %         | 26.5    | 40.1 | 1.8  | 10.9 | ** |
|       |           | PE 18:0/20:5     |                  | Area  |         |    | 1.3  | Control | 24.0 | 5.8  |    | %         | 73.5    | 59.9 | 0.7  | 7.3  | ** |
|       |           |                  |                  | Total |         |    | 1.1  | Control | 24.1 | 11.7 |    |           |         |      |      |      |    |
| 766.5 | PE 38:4   | PE 18:1/20:3     |                  | Area  |         |    | 2.4  | Control | 43.6 | 33.0 |    | %         | 27.1    | 4.0  | 27.2 | 37.7 | ** |
|       |           | PE 18:0/20:4     |                  | Area  |         |    | 4.1  | GM      | 14.2 | 9.6  | ** | %         | 67.2    | 90.7 | 9.3  | 1.9  | ** |
|       |           | PE 18:3/22:5     |                  | Area  |         |    | 3.0  | GM      | 18.7 | 30.7 | *  | %         | 5.6     | 5.3  | 21.8 | 25.1 | ** |
|       |           |                  |                  | Total |         |    | 3.0  | GM      | 21.8 | 8.9  | ** |           |         |      |      |      |    |
| 786.5 | PE 40:8   | PE 20:3/20:5     |                  | Area  |         |    | 1.9  | GM      | 43.0 | 22.1 |    | %         | 4.8     | 7.6  | 42.5 | 12.1 |    |
|       |           | PE 18:2/22:6     |                  | Area  |         |    | 1.1  | GM      | 45.9 | 23.5 |    | %         | 95.2    | 92.4 | 2.1  | 1.0  |    |
|       |           |                  |                  | Total |         |    | 1.2  | GM      | 45.2 | 23.2 |    |           |         |      |      |      |    |
| 788.5 | PE 40:7   | PE 18:2/22:5     |                  | Area  |         |    | 1.1  | GM      | 31.7 | 21.9 |    | %         | 5.3     | 14.1 | 10.3 | 25.5 | *  |
|       |           | PE 20:2/20:5     |                  | Area  |         |    | 1.1  | GM      | 29.5 | 14.0 |    | %         | 4.9     | 13.7 | 14.7 | 30.5 | *  |
|       |           | PE 18:1/22:6     |                  | Area  |         |    | 2.9  | Control | 40.6 | 41.3 |    | %         | 89.9    | 72.2 | 1.4  | 8.8  | ** |
|       |           |                  |                  | Total |         |    | 2.4  | Control | 39.4 | 32.7 |    |           |         |      |      |      |    |
| 790.5 | PE 40:6   | PE 18:1/22:5 (a) |                  | Area  |         |    | 2.6  | Control | 30.0 | 31.2 | *  | %         | 11.0    | 4.3  | 10.6 | 3.4  | ** |
|       |           | PE 20:1/20:5     |                  | Area  |         |    | 1.4  | Control | 31.6 | 24.4 |    | %         | 12.7    | 9.6  | 12.7 | 20.2 |    |
|       |           | PE 18:1/22:5 (b) |                  | Area  |         |    | 5.2  | Control | 29.6 | 60.2 | *  | %         | 5.4     | 1.1  | 7.1  | 53.5 | ** |
|       |           | PE 18:0/22:6     |                  | Area  |         |    | 1.2  | GM      | 26.3 | 29.2 |    | %         | 70.9    | 85.0 | 3.4  | 2.9  | ** |
|       |           |                  |                  | Total |         |    | 1.0  | Control | 27.0 | 28.2 |    | Ratio a/b | 2.1     | 5.4  | 18.0 | 74.6 |    |
| 792.6 | PE 40:5   | PE 18:0/22:5 (a) |                  | Area  |         |    | 1.8  | GM      | 22.1 | 19.5 | *  | %         | 75.7    | 82.3 | 6.2  | 3.7  |    |
|       |           | PE 20:0/20:5     |                  | Area  |         |    | 2.2  | GM      | 35.5 | 20.1 | *  | %         | 9.9     | 13.3 | 40.4 | 26.8 |    |
|       |           | PE 18:0/22:5 (b) |                  | Area  |         |    | 2.0  | Control | 36.3 | 33.4 |    | %         | 14.4    | 4.4  | 15.1 | 18.6 | ** |
|       |           |                  |                  | Total |         |    | 1.6  | GM      | 21.9 | 17.4 | *  | Ratio a/b | 5.4     | 18.9 | 20.3 | 18.5 | ** |
| 793.5 | PG 38:6   | PG 18:1/20:5     |                  | Area  |         |    | 8.3  | Control | 19.7 | 3.0  | ** | %         | 28.9    | 15.2 | 7.3  | 31.6 | *  |
|       |           | PG 16:0/22:6     |                  | Area  |         |    | 3.4  | Control | 9.3  | 30.9 | ** | %         | 71.1    | 84.8 | 3.0  | 5.7  | *  |
|       |           |                  |                  | Total |         |    | 4.1  | Control | 12.3 | 26.4 | ** |           |         |      |      |      |    |
| 794.6 | PE 40:4   | PE 20:1/20:3     |                  | Area  |         |    | N/A  | GM      | 0.0  | 54.2 | *  | %         | 0.0     | 19.8 | 0.0  | 35.0 | ** |
|       |           | PE 18:0/22:4     |                  | Area  |         |    | N/A  | GM      | 0.0  | 13.2 | ** | %         | 0.0     | 37.7 | 0.0  | 10.6 | ** |
|       |           | PE 20:0/20:4     |                  | Area  |         |    | N/A  | GM      | 0.0  | 8.2  | ** | %         | 0.0     | 42.5 | 0.0  | 12.0 | ** |
|       |           |                  |                  | Total |         |    | N/A  | GM      | 0.0  | 17.9 | ** |           |         |      |      |      |    |
| 818.6 | PE 42:6   | PE 20:1/22:5     |                  | Area  |         |    | 1.2  | Control | 27.4 | 45.9 |    | %         | 14.9    | 6.3  | 17.2 | 34.7 | *  |
|       |           | PE 20:0/22:6     |                  | Area  |         |    | 2.1  | GM      | 7.3  | 11.6 | ** | %         | 85.1    | 93.7 | 3.0  | 2.3  | *  |
|       |           |                  |                  | Total |         |    | 1.9  | GM      | 10.3 | 13.9 | ** |           |         |      |      |      |    |
| 822.5 | PC 36:6   | PC 18:3/18:3     |                  | Area  |         |    | 6.7  | GM      | 56.5 | 33.3 | *  | %         | 3.0     | 41.4 | 53.8 | 29.2 | ** |
|       |           | PC 16:1/20:5     | PC 18:2/18:4     | Area  |         |    | 3.4  | Control | 54.9 | 26.8 |    | %         | 25.1    | 16.0 | 9.0  | 12.8 | ** |
|       |           | PC 14:0/22:6     |                  | Area  |         |    | 3.6  | Control | 51.4 | 40.4 |    | %         | 71.9    | 42.6 | 0.9  | 23.9 | ** |
|       |           |                  |                  | Total |         |    | 2.1  | Control | 51.9 | 23.0 |    |           |         |      |      |      |    |
| 826.6 | PC 36:4   | PC 18:2/18:2     |                  | Area  |         |    | 1.0  | GM      | 20.3 | 5.8  |    | %         | 25.1    | 16.8 | 5.8  | 8.7  | ** |
|       |           | PC 18:1/18:3     |                  | Area  |         |    | 1.0  | Control | 19.7 | 22.1 |    | %         | 38.4    | 23.7 | 13.8 | 9.0  | *  |
|       |           | PC 16:0/20:4 (a) |                  | Area  |         |    | 1.0  | GM      | 20.8 | 27.7 |    | %         | 15.8    | 10.2 | 15.5 | 22.8 | *  |
|       |           | PC 16:0/20:4 (b) |                  | Area  |         |    | 3.7  | GM      | 31.7 | 13.1 | ** | %         | 20.7    | 49.3 | 21.6 | 5.6  | ** |
|       |           |                  |                  | Total |         |    | 1.6  | GM      | 18.9 | 13.9 | *  | Ratio b/a | 1.3     | 5.1  | 12.6 | 25.3 | ** |
| 828.6 | PC 36:3   | PC 18:1/18:2     |                  | Area  |         |    | 2.0  | Control | 12.3 | 11.1 | ** | %         | 65.3    | 36.8 | 7.2  | 14.5 | ** |
|       |           | PC 16:0/20:3     | PC 18:0/18:3     | Area  |         |    | 1.7  | GM      | 29.0 | 29.6 |    | %         | 34.7    | 63.2 | 13.6 | 8.4  | ** |
|       |           |                  |                  | Total |         |    | 1.1  | Control | 16.7 | 22.6 |    |           |         |      |      |      |    |
| 830.6 | PC 36:2   | PC 18:1/18:1     |                  | Area  |         |    | 3.9  | Control | 10.8 | 27.6 | ** | %         | 59.0    | 26.4 | 11.4 | 9.7  | ** |
|       |           | PC 16:0/20:2 (a) |                  | Area  |         |    | 1.2  | Control | 28.2 | 12.3 |    | %         | 13.5    | 19.8 | 27.9 | 12.6 |    |
|       |           | PC 18:0/18:2     | PC 16:0/20:2 (b) | Area  |         |    | 1.1  | GM      | 13.4 | 21.1 |    | %         | 27.5    | 53.8 | 11.7 | 0.8  | ** |
|       |           |                  |                  | Total |         |    | 1.8  | Control | 2.4  | 20.6 | ** | Ratio b/a | 2.1     | 2.8  | 21.9 | 11.9 |    |
| 848.5 | PC 38:7   | PC 18:3/20:4     |                  | Area  |         |    | 5.8  | GM      | 23.3 | 44.8 | *  | %         | 1.7     | 6.5  | 18.8 | 46.0 | *  |
|       |           | PC 18:2/20:5     |                  | Area  |         |    | 1.7  | GM      | 50.4 | 19.1 |    | %         | 64.0    | 77.5 | 10.6 | 5.0  | ** |
|       |           | PC 16:1/22:6 (a) |                  | Area  |         |    | 2.1  | Control | 38.5 | 11.3 |    | %         | 24.1    | 8.0  | 12.2 | 12.9 | ** |
|       |           | PC 16:1/22:6 (b) |                  | Area  |         |    | 1.2  | GM      | 40.2 | 36.0 |    | %         | 10.2    | 8.1  | 36.4 | 26.1 | ** |
|       |           |                  |                  | Total |         |    | 1.4  | GM      | 45.0 | 17.5 |    | Ratio a/b | 2.5     | 1.1  | 23.7 | 42.9 | *  |
| 854.6 | PC 38:4   | PC 18:2/20:2     |                  | Area  |         |    | 1.2  | Control | 48.2 | 39.2 |    | %         | 25.5    | 10.6 | 21.2 | 30.8 | *  |
|       |           | PC 18:3/20:1     | PC 18:1/20:3     | Area  |         |    | 1.4  | GM      | 23.3 | 48.6 |    | %         | 27.5    | 17.9 | 8.2  | 27.8 | *  |
|       |           | PC 16:0/22:4     | PC 18:0/20:4 (a) | Area  |         |    | 2.0  | GM      | 31.4 | 2.7  | ** | %         | 17.7    | 17.8 | 7.9  | 21.2 | ** |
|       |           | PC 18:0/20:4 (b) |                  | Area  |         |    | 3.9  | GM      | 17.3 | 19.9 | ** | %         | 29.4    | 53.7 | 13.5 | 7.1  | ** |
|       |           |                  |                  | Total |         |    | 2.1  | GM      | 29.4 | 21.6 | *  | Ratio b/a | 1.7     | 3.1  | 19.8 | 19.4 | *  |

| 872.5 | PC 40:9  | PC 20:4/20:5     |              | Area  |  |  | 2.2  | GM      | 76.4 | 24.2 |    | %         | 27.5 | 20.5 | 48.5 | 7.5  |   |  |
|-------|----------|------------------|--------------|-------|--|--|------|---------|------|------|----|-----------|------|------|------|------|---|--|
|       |          | PC 18:3/22:6     |              | Area  |  |  | 3.6  | GM      | 6.9  | 16.0 | ** | %         | 72.5 | 79.5 | 18.4 | 1.9  |   |  |
|       |          |                  |              | Total |  |  | 3.2  | GM      | 27.2 | 17.7 | ** |           |      |      |      |      |   |  |
| 874.6 | PC 40:8  | PC 18:3/22:5     |              | Area  |  |  | 4.6  | GM      | 59.2 | 21.0 | ** | %         | 7.1  | 16.0 | 20.3 | 14.3 | * |  |
|       |          | PC 20:3/20:5     | PC 20:4/20:4 | Area  |  |  | 4.6  | GM      | 42.8 | 22.9 | ** | %         | 12.9 | 28.2 | 24.6 | 12.3 | * |  |
|       |          | PC 18:2/22:6     |              | Area  |  |  | 1.5  | GM      | 36.8 | 11.5 |    | %         | 80.0 | 55.9 | 4.2  | 3.4  |   |  |
|       |          |                  |              | Total |  |  | 2.1  | GM      | 38.5 | 14.2 | *  |           |      |      |      |      |   |  |
| 878.6 | PC 40:6  | PC 20:1/20:5     |              | Area  |  |  | 1.2  | GM      | 53.1 | 25.7 |    | %         | 22.0 | 24.4 | 17.4 | 22.0 |   |  |
|       |          | PC 18:0/22:6     |              | Area  |  |  | 1.1  | GM      | 35.8 | 35.4 |    | %         | 78.0 | 75.6 | 4.9  | 7.1  |   |  |
|       |          |                  |              | Total |  |  | 1.1  | GM      | 39.7 | 31.9 |    |           |      |      |      |      |   |  |
| 880.6 | PC 40:5  | PC 18:0/22:5 (a) |              | Area  |  |  | 1.5  | GM      | 39.8 | 30.9 |    | %         | 80.1 | 76.5 | 4.9  | 4.7  |   |  |
|       |          | PC 20:0/20:5     |              | Area  |  |  | 3.3  | GM      | 68.3 | 24.4 | *  | %         | 9.0  | 20.6 | 32.6 | 15.2 | * |  |
|       |          | PC 18:0/22:5 (b) |              | Area  |  |  | 2.3  | Control | 39.2 | 37.2 |    | %         | 11.0 | 2.9  | 17.2 | 19.6 | * |  |
|       |          |                  |              | Total |  |  | 1.6  | GM      | 42.1 | 29.0 |    | Ratio a/b | 7.5  | 26.9 | 19.4 | 25.8 | * |  |
| 881.5 | PI 38:6  | PI 18:1/20:5     |              | Area  |  |  | 4.8  | Control | 28.5 | 25.9 | ** | %         | 58.4 | 41.0 | 12.6 | 32.5 |   |  |
|       |          | PI 16:0/22:6     |              | Area  |  |  | 2.1  | Control | 2.7  | 41.7 | ** | %         | 41.6 | 59.0 | 17.7 | 22.5 |   |  |
|       |          |                  |              | Total |  |  | 3.2  | Control | 17.7 | 27.2 | ** |           |      |      |      |      |   |  |
| 882.6 | PC 40:4  | PC 20:1/20:3     |              | Area  |  |  | 3.0  | GM      | 29.8 | 26.6 | *  | %         | 46.1 | 32.2 | 26.8 | 12.6 |   |  |
|       |          | PC 18:0/22:4     |              | Area  |  |  | 3.7  | GM      | 36.7 | 22.4 | ** | %         | 40.9 | 35.2 | 30.1 | 5.2  |   |  |
|       |          | PC 20:0/20:4     |              | Area  |  |  | 10.1 | GM      | 57.7 | 13.1 | ** | %         | 13.0 | 32.7 | 35.0 | 9.6  | * |  |
|       |          |                  |              | Total |  |  | 4.3  | GM      | 24.2 | 19.7 | ** |           |      |      |      |      |   |  |
| 883.5 | PI 38:5  | PI 18:1/20:4     | PI 18:1/20:4 | Area  |  |  | 2.7  | Control | 19.3 | 18.6 | ** | %         | 52.5 | 73.6 | 1.9  | 1.7  | * |  |
|       |          | PI 18:0/20:5     | PI 18:0/20:5 | Area  |  |  | 6.8  | Control | 19.4 | 11.7 | ** | %         | 47.5 | 26.4 | 2.1  | 4.7  | * |  |
|       |          |                  |              | Total |  |  | 3.8  | Control | 19.3 | 16.8 | ** |           |      |      |      |      |   |  |
| 898.6 | PC 42:10 | PC 20:5/22:5     |              | Area  |  |  | 2.7  | GM      | 22.6 | 28.1 | *  | %         | 41.3 | 35.9 | 15.2 | 6.8  |   |  |
|       |          | PC 20:4/22:6 (a) |              | Area  |  |  | 3.0  | GM      | 52.4 | 20.9 | *  | %         | 40.3 | 41.6 | 14.0 | 1.8  |   |  |
|       |          | PC 20:4/22:6 (b) |              | Area  |  |  | 3.6  | GM      | 43.9 | 16.9 | ** | %         | 18.4 | 22.5 | 4.7  | 7.4  | * |  |
|       |          |                  |              | Total |  |  | 3.0  | GM      | 38.9 | 22.4 | *  | Ratio a/b | 2.2  | 1.9  | 10.9 | 5.7  |   |  |
| 900.6 | PC 42:9  | PC 20:4/22:5     |              | Area  |  |  | 7.4  | GM      | 44.9 | 6.0  | ** | %         | 10.5 | 19.2 | 40.1 | 12.4 | * |  |
|       |          | PC 20:3/22:6     |              | Area  |  |  | 3.5  | GM      | 37.3 | 11.6 | ** | %         | 89.5 | 80.8 | 4.7  | 2.9  | * |  |
|       |          |                  |              | Total |  |  | 3.9  | GM      | 34.4 | 8.8  | ** |           |      |      |      |      |   |  |
| 904.6 | PC 42:7  | PC 20:2/22:5     |              | Area  |  |  | 1.4  | GM      | 49.5 | 28.9 |    | %         | 12.0 | 12.6 | 4.5  | 5.1  |   |  |
|       |          | PC 20:1/22:6     |              | Area  |  |  | 1.4  | GM      | 51.4 | 33.3 |    | %         | 88.0 | 87.4 | 0.6  | 0.7  |   |  |
|       |          |                  |              | Total |  |  | 1.4  | GM      | 51.1 | 32.7 |    |           |      |      |      |      |   |  |
| 906.6 | PC 42:6  | PC 20:0/22:6 (a) | PC 20:2/22:4 | Area  |  |  | 1.3  | GM      | 35.0 | 37.7 |    | %         | 21.0 | 12.8 | 19.6 | 16.7 | * |  |
|       |          | PC 20:1/22:5     |              | Area  |  |  | 1.4  | GM      | 59.3 | 22.7 |    | %         | 48.1 | 37.2 | 15.1 | 5.2  |   |  |
|       |          | PC 20:0/22:6 (b) |              | Area  |  |  | 3.3  | GM      | 33.2 | 24.6 | *  | %         | 30.9 | 50.0 | 13.3 | 6.7  | * |  |
|       |          |                  |              | Total |  |  | 2.0  | GM      | 46.3 | 25.0 |    | Ratio b/a | 1.5  | 4.0  | 16.5 | 24.9 | * |  |
| 926.6 | PC 44:10 | PC 22:5/22:5     |              | Area  |  |  | 2.7  | GM      | 42.7 | 6.8  | ** | %         | 51.5 | 44.6 | 12.0 | 16.0 |   |  |
|       |          | PC 20:5/24:5     |              | Area  |  |  | 2.2  | GM      | 52.1 | 49.4 |    | %         | 26.4 | 19.0 | 30.1 | 37.9 | * |  |
|       |          | PC 22:4/22:6     |              | Area  |  |  | 5.7  | GM      | 9.8  | 17.1 | ** | %         | 22.1 | 36.4 | 34.6 | 1.9  | * |  |
|       |          |                  |              | Total |  |  | 3.2  | GM      | 35.4 | 16.6 | ** |           |      |      |      |      |   |  |

Supplementary Table S20. LC-MS/MS data for liver tissue at the intermediate timepoint. Green and red represent high and low absolute peak areas, respectively.  $p < 0.01 = **$ ,  $p = 0.01-0.05 = *$ . Stars with a red background denote falling below the Benamini-Hochberg critical value.

| MW    | Simple ID | ID1              | ID2              |       | Control | GM | Fold | Highest | RSD% | RSD% | P  |           | Control | GM   | RSD% | RSD% | P  |
|-------|-----------|------------------|------------------|-------|---------|----|------|---------|------|------|----|-----------|---------|------|------|------|----|
| 762.5 | PE 38:6   | PE 18:2/20:4     |                  | Area  |         |    | 7.7  | GM      | 30.8 | 22.0 | ** | %         | 2.5     | 31.1 | 30.3 | 8.2  | ** |
|       |           | PE 18:1/20:5     |                  | Area  |         |    | 5.6  | Control | 7.0  | 24.5 | ** | %         | 42.7    | 12.6 | 7.8  | 9.3  | ** |
|       |           | PE 16:0/22:6     |                  | Area  |         |    | 1.6  | Control | 8.0  | 33.0 |    | %         | 54.8    | 56.3 | 4.7  | 5.9  |    |
|       |           |                  |                  | Total |         |    | 1.6  | Control | 4.6  | 28.4 | *  |           |         |      |      |      |    |
| 764.5 | PE 38:5   | PE 16:0/22:5     | PE 18:1/20:4     | Area  |         |    | 1.7  | GM      | 7.6  | 22.4 | *  | %         | 25.0    | 37.4 | 8.4  | 2.8  | ** |
|       |           | PE 18:0/20:5     |                  | Area  |         |    | 1.1  | Control | 10.4 | 24.8 |    | %         | 75.0    | 62.6 | 2.8  | 1.7  | ** |
|       |           |                  |                  | total |         |    | 1.1  | GM      | 8.4  | 23.9 |    |           |         |      |      |      |    |
| 784.5 | PE 40:9   | PE 20:4/20:5     |                  | Area  |         |    | 1.0  | Control | 20.4 | 28.4 |    | %         | 6.5     | 5.6  | 22.0 | 3.7  |    |
|       |           | PE 18:3/22:6     |                  | Area  |         |    | 1.1  | GM      | 3.3  | 28.8 |    | %         | 93.5    | 94.4 | 1.5  | 0.2  |    |
|       |           |                  |                  | total |         |    | 1.1  | GM      | 2.0  | 28.8 |    |           |         |      |      |      |    |
| 788.5 | PE 40:7   | PE 18:2/22:5     |                  | Area  |         |    | 1.5  | GM      | 17.6 | 20.3 |    | %         | 3.3     | 15.5 | 14.4 | 12.9 | ** |
|       |           | PE 20:2/20:5     |                  | Area  |         |    | 1.3  | GM      | 5.6  | 35.1 |    | %         | 5.3     | 20.1 | 3.3  | 5.7  | ** |
|       |           | PE 18:1/22:6     |                  | Area  |         |    | 4.3  | Control | 2.6  | 31.6 | ** | %         | 91.5    | 64.4 | 0.6  | 1.4  | ** |
|       |           |                  |                  | Total |         |    | 3.0  | Control | 3.2  | 30.6 | ** |           |         |      |      |      |    |
| 790.5 | PE 40:6   | PE 20:1/20:5     |                  | Area  |         |    | 2.5  | Control | 10.0 | 25.0 | ** | %         | 19.7    | 8.5  | 4.8  | 3.5  | ** |
|       |           | PE 18:0/22:6     |                  | Area  |         |    | 1.0  | GM      | 4.7  | 26.8 |    | %         | 80.3    | 91.5 | 1.2  | 0.3  | ** |
|       |           |                  |                  | total |         |    | 1.1  | Control | 5.6  | 26.6 |    |           |         |      |      |      |    |
| 792.6 | PE 40:5   | PE 18:0/22:5     | PE 20:1/20:4     | Area  |         |    | 2.9  | GM      | 6.7  | 20.6 | ** | %         | 81.2    | 86.5 | 3.4  | 2.0  | *  |
|       |           | PE 20:0/20:5     |                  | Area  |         |    | 2.0  | GM      | 12.5 | 30.4 | *  | %         | 18.8    | 13.5 | 14.9 | 13.1 | *  |
|       |           |                  |                  | total |         |    | 2.7  | GM      | 3.7  | 21.4 | ** |           |         |      |      |      |    |
| 794.6 | PE 40:4   | PE 20:1/20:3     |                  | Area  |         |    | 2.9  | Control | 20.8 | 26.4 | ** | %         | 76.9    | 11.3 | 3.2  | 10.2 | ** |
|       |           | PE 18:0/22:4     |                  | Area  |         |    | 6.7  | GM      | 35.2 | 22.4 | ** | %         | 14.8    | 44.2 | 15.1 | 15.0 | ** |
|       |           | PE 20:0/20:4     |                  | Area  |         |    | 13.3 | GM      | 19.5 | 52.0 | *  | %         | 8.3     | 44.5 | 6.5  | 17.5 | ** |
|       |           |                  |                  | Total |         |    | 2.4  | GM      | 22.3 | 35.5 |    |           |         |      |      |      |    |
| 814.5 | PE 42:8   | PE 20:2/22:6 (a) |                  | Area  |         |    | 1.1  | Control | 12.4 | 30.5 |    | %         | 93.2    | 82.2 | 1.6  | 1.5  | ** |
|       |           | PE 20:2/22:6 (b) |                  | Area  |         |    | 2.8  | GM      | 11.5 | 33.2 | *  | %         | 6.8     | 17.8 | 21.5 | 6.9  | ** |
|       |           |                  |                  | total |         |    | 1.1  | GM      | 10.9 | 30.8 |    | Ratio a/b | 14.1    | 4.6  | 23.8 | 8.3  | ** |
| 818.6 | PE 42:6   | PE 20:1/22:5     |                  | Area  |         |    | 1.1  | GM      | 7.3  | 21.2 |    | %         | 24.7    | 14.7 | 13.0 | 10.7 | ** |
|       |           | PE 20:0/22:6     |                  | Area  |         |    | 2.0  | GM      | 15.8 | 23.0 | *  | %         | 75.3    | 85.3 | 4.3  | 1.8  | ** |
|       |           |                  |                  | total |         |    | 1.8  | GM      | 12.3 | 22.2 | *  |           |         |      |      |      |    |
| 822.5 | PC 36:6   | PC 18:3/18:3     |                  | Area  |         |    | 1.6  | GM      | 15.3 | 24.0 |    | %         | 4.3     | 21.6 | 15.7 | 10.3 | ** |
|       |           | PC 16:1/20:5     |                  | Area  |         |    | 3.3  | Control | 12.6 | 24.9 | ** | %         | 19.0    | 17.8 | 13.5 | 7.7  | ** |
|       |           | PC 14:0/22:6     |                  | Area  |         |    | 3.8  | Control | 4.5  | 33.2 | ** | %         | 76.7    | 60.7 | 2.8  | 5.9  | ** |
|       |           |                  |                  | Total |         |    | 3.1  | Control | 2.1  | 29.3 | ** |           |         |      |      |      |    |
| 826.6 | PC 36:4   | PC 18:2/18:2     |                  | Area  |         |    | 1.6  | Control | 6.8  | 21.3 | ** | %         | 28.9    | 15.6 | 5.0  | 2.8  | ** |
|       |           | PC 18:1/18:3     |                  | Area  |         |    | 2.6  | Control | 22.5 | 28.3 | *  | %         | 43.3    | 14.5 | 14.4 | 9.1  | ** |
|       |           | PC 16:0/20:4 (a) |                  | Area  |         |    | 1.2  | Control | 11.5 | 7.8  |    | %         | 11.8    | 9.1  | 20.3 | 17.4 |    |
|       |           | PC 16:0/20:4 (c) |                  | Area  |         |    | 1.4  | Control | 35.9 | 45.8 |    | %         | 3.2     | 1.9  | 45.6 | 26.7 |    |
|       |           | PC 16:0/20:4 (b) |                  | Area  |         |    | 5.3  | GM      | 9.5  | 24.0 | ** | %         | 12.8    | 58.9 | 14.6 | 1.4  | ** |
|       |           |                  |                  | Total |         |    | 1.1  | GM      | 8.9  | 22.9 |    | Ratio b/a | 1.1     | 6.6  | 7.9  | 17.8 | ** |
| 828.6 | PC 36:3   | PC 18:1/18:2     |                  | Area  |         |    | 3.4  | Control | 6.6  | 18.6 | ** | %         | 70.0    | 33.7 | 6.3  | 3.6  | ** |
|       |           | PC 16:0/20:3 (a) | PC 18:1/18:2     | Area  |         |    | 1.0  | GM      | 15.7 | 20.1 |    | %         | 29.4    | 49.8 | 15.0 | 2.2  | ** |
|       |           | PC 16:0/20:3 (b) |                  | Area  |         |    | 15.9 | GM      | 33.5 | 19.0 | ** | %         | 0.6     | 16.5 | 36.2 | 1.0  | ** |
|       |           |                  |                  | Total |         |    | 1.6  | Control | 2.6  | 19.2 | ** | Ratio a/b | 49.4    | 3.0  | 33.0 | 1.6  | ** |
| 830.6 | PC 36:2   | PC 18:1/18:1     |                  | Area  |         |    | 6.5  | Control | 17.8 | 6.2  | ** | %         | 51.4    | 23.7 | 9.0  | 18.7 | ** |
|       |           | PC 16:0/20:2     |                  | Area  |         |    | 3.0  | Control | 10.6 | 29.8 | ** | %         | 22.8    | 21.5 | 15.0 | 9.3  |    |
|       |           | PC 18:0/18:2     |                  | Area  |         |    | 1.3  | Control | 8.0  | 26.4 |    | %         | 25.7    | 54.9 | 11.9 | 5.3  | ** |
|       |           |                  |                  | Total |         |    | 2.9  | Control | 8.5  | 22.1 | ** |           |         |      |      |      |    |
| 848.5 | PC 38:7   | PC 18:2/20:5     |                  | Area  |         |    | 1.7  | GM      | 8.5  | 24.6 | *  | %         | 53.6    | 85.2 | 3.6  | 2.4  | ** |
|       |           | PC 16:1/22:6 (a) |                  | Area  |         |    | 3.9  | Control | 3.7  | 34.9 | ** | %         | 31.4    | 7.4  | 2.7  | 17.8 | ** |
|       |           | PC 16:1/22:6 (b) |                  | Area  |         |    | 1.8  | Control | 6.7  | 34.5 | *  | %         | 15.1    | 7.4  | 10.3 | 11.7 | ** |
|       |           |                  |                  | Total |         |    | 1.1  | GM      | 4.9  | 25.4 |    | Ratio a/b | 2.1     | 1.0  | 10.6 | 12.2 | ** |
| 850.6 | PC 38:6   | PC 18:2/20:4     |                  | Area  |         |    | 9.6  | GM      | 13.9 | 24.2 | ** | %         | 1.1     | 15.7 | 13.9 | 1.4  | ** |
|       |           | PC 18:1/20:5     |                  | Area  |         |    | 2.0  | Control | 14.9 | 26.7 | *  | %         | 17.3    | 12.5 | 11.5 | 7.2  | *  |
|       |           | PC 16:0/22:6     |                  | Area  |         |    | 1.7  | Control | 1.0  | 23.7 | ** | %         | 81.6    | 71.9 | 2.5  | 1.6  | ** |
|       |           |                  |                  | Total |         |    | 1.5  | Control | 3.2  | 24.0 | *  |           |         |      |      |      |    |
| 852.6 | PC 38:5   | PC 18:1/20:4 (a) |                  | Area  |         |    | 1.4  | Control | 1.8  | 17.1 | *  | %         | 7.7     | 4.1  | 12.8 | 21.0 | ** |
|       |           | PC 16:0/22:5     | PC 18:1/20:4 (b) | Area  |         |    | 1.4  | GM      | 2.9  | 23.1 |    | %         | 51.5    | 51.3 | 11.0 | 4.6  |    |
|       |           | PC 18:0/20:5     |                  | Area  |         |    | 1.5  | GM      | 31.4 | 29.1 |    | %         | 40.8    | 44.7 | 16.2 | 5.8  |    |
|       |           |                  |                  | Total |         |    | 1.4  | GM      | 14.4 | 25.0 |    | Ratio b/a | 6.7     | 12.9 | 3.5  | 23.2 | *  |
| 854.6 | PC 38:4   | PC 18:2/20:2     |                  | Area  |         |    | 2.1  | Control | 14.1 | 17.8 | ** | %         | 35.4    | 10.3 | 7.6  | 6.2  | ** |
|       |           | PC 18:3/20:1     | PC 18:1/20:3     | Area  |         |    | 1.1  | GM      | 13.0 | 9.6  |    | %         | 34.8    | 22.4 | 6.2  | 7.6  | ** |
|       |           | PC 16:0/22:4     |                  | Area  |         |    | 2.7  | GM      | 28.9 | 14.5 | ** | %         | 11.0    | 17.8 | 21.1 | 1.4  | ** |
|       |           | PC 18:0/20:4     |                  | Total |         |    | 4.5  | GM      | 33.0 | 15.4 | ** | %         | 18.8    | 49.4 | 37.5 | 3.8  | ** |
|       |           |                  |                  | %     |         |    | 1.7  | GM      | 7.6  | 13.5 | ** |           |         |      |      |      |    |
| 856.6 | PC 38:3   | PC 18:2/20:1     | PC 18:1/20:2     | Area  |         |    | 3.1  | Control | 1.3  | 19.9 | ** | %         | 90.5    | 65.6 | 0.7  | 2.4  | ** |
|       |           | PC 18:0/20:3     |                  | Area  |         |    | 1.6  | GM      | 8.9  | 26.6 |    | %         | 9.5     | 34.4 | 6.9  | 4.6  | ** |
|       |           |                  |                  | total |         |    | 2.2  | Control | 2.0  | 22.2 | ** |           |         |      |      |      |    |

|       |          |                  |              |       |  |  |      |         |      |      |    |           |      |      |      |      |    |
|-------|----------|------------------|--------------|-------|--|--|------|---------|------|------|----|-----------|------|------|------|------|----|
|       |          |                  |              |       |  |  |      |         |      |      |    |           |      |      |      |      |    |
| 858.6 | PC 38:2  | PC 18:1/20:1     |              | Area  |  |  | 3.6  | Control | 19.5 | 28.9 | ** | %         | 82.9 | 52.8 | 3.5  | 13.9 | ** |
|       |          | PC 18:0/20:2     |              | Area  |  |  | 1.3  | GM      | 3.2  | 43.5 |    | %         | 17.1 | 47.2 | 16.8 | 15.5 | ** |
|       |          |                  |              | total |  |  | 2.3  | Control | 15.9 | 34.6 | *  |           |      |      |      |      |    |
|       |          |                  |              |       |  |  |      |         |      |      |    |           |      |      |      |      |    |
| 867.5 | PG 44:11 | PG 22:5/22:6 (a) |              | Area  |  |  | 1.7  | GM      | 21.7 | 42.1 |    | %         | 97.3 | 90.7 | 0.7  | 2.5  | ** |
|       |          | PG 22:5/22:6 (b) |              | Area  |  |  | 6.6  | GM      | 24.4 | 56.8 |    | %         | 2.7  | 9.3  | 24.3 | 24.8 | ** |
|       |          |                  |              | total |  |  | 1.8  | GM      | 21.4 | 43.5 |    | Ratio a/b | 36.8 | 10.3 | 22.0 | 31.1 | ** |
|       |          |                  |              |       |  |  |      |         |      |      |    |           |      |      |      |      |    |
| 872.5 | PC 40:9  | PC 20:4/20:5 (a) |              | Area  |  |  | 3.7  | GM      | 12.0 | 20.6 | ** | %         | 12.3 | 26.3 | 13.5 | 3.3  | ** |
|       |          | PC 18:3/22:6     |              | Area  |  |  | 1.2  | GM      | 5.9  | 25.1 |    | %         | 85.0 | 60.4 | 2.8  | 3.2  | ** |
|       |          | PC 20:4/20:5 (b) |              | Area  |  |  | 8.6  | GM      | 57.2 | 24.1 | ** | %         | 2.7  | 13.3 | 59.6 | 13.9 | ** |
|       |          |                  |              | Total |  |  | 1.7  | GM      | 3.2  | 23.0 | *  | Ratio a/b | 6.6  | 2.0  | 82.6 | 15.1 |    |
|       |          |                  |              |       |  |  |      |         |      |      |    |           |      |      |      |      |    |
| 874.6 | PC 40:8  | PC 18:3/22:5     |              | Area  |  |  | 2.9  | GM      | 14.1 | 22.3 | ** | %         | 4.8  | 11.2 | 14.6 | 2.7  | ** |
|       |          | PC 20:3/20:5     | PC 20:4/20:4 | Area  |  |  | 5.3  | GM      | 35.8 | 21.8 | ** | %         | 7.2  | 30.7 | 34.9 | 2.9  | ** |
|       |          | PC 18:2/22:6     |              | Area  |  |  | 1.2  | Control | 2.1  | 23.2 |    | %         | 88.0 | 58.1 | 2.1  | 1.2  | ** |
|       |          |                  |              | Total |  |  | 1.2  | GM      | 1.7  | 22.5 |    |           |      |      |      |      |    |
|       |          |                  |              |       |  |  |      |         |      |      |    |           |      |      |      |      |    |
| 876.6 | PC 40:7  | PC 18:2/22:5     |              | Area  |  |  | 1.7  | GM      | 3.2  | 24.3 | *  | %         | 8.2  | 25.4 | 4.5  | 10.2 | ** |
|       |          | PC 20:2/20:5     | C20:3/20:4   | Area  |  |  | 2.4  | GM      | 24.4 | 32.4 | *  | %         | 7.4  | 32.3 | 30.1 | 8.4  | ** |
|       |          | PC 18:1/22:6     |              | Area  |  |  | 3.7  | Control | 9.8  | 23.8 | ** | %         | 84.4 | 42.3 | 3.0  | 4.2  | ** |
|       |          |                  |              | Total |  |  | 1.8  | Control | 6.7  | 26.0 | ** |           |      |      |      |      |    |
|       |          |                  |              |       |  |  |      |         |      |      |    |           |      |      |      |      |    |
| 880.6 | PC 40:5  | PC 18:0/22:5     |              | Area  |  |  | 1.7  | GM      | 14.8 | 16.6 | *  | %         | 81.5 | 70.3 | 2.1  | 2.4  | ** |
|       |          | PC 20:0/20:5     |              | Area  |  |  | 3.1  | GM      | 25.9 | 18.8 | ** | %         | 18.5 | 29.7 | 9.2  | 5.6  | ** |
|       |          |                  |              | total |  |  | 2.0  | GM      | 16.9 | 16.8 | *  |           |      |      |      |      |    |
|       |          |                  |              |       |  |  |      |         |      |      |    |           |      |      |      |      |    |
| 881.5 | PI 38:6  | PI 18:1/20:5     |              | Area  |  |  | 5.5  | Control | 14.8 | 27.0 | ** | %         | 62.3 | 54.2 | 8.4  | 6.0  |    |
|       |          | PI 16:1/22:6     |              | Area  |  |  | 4.0  | Control | 7.4  | 21.6 | ** | %         | 37.7 | 45.8 | 13.9 | 7.1  |    |
|       |          |                  |              | total |  |  | 4.8  | Control | 6.7  | 24.0 | ** |           |      |      |      |      |    |
|       |          |                  |              |       |  |  |      |         |      |      |    |           |      |      |      |      |    |
| 882.6 | PC 40:4  | PC 20:1/20:3     |              | Area  |  |  | 1.2  | Control | 17.4 | 16.4 |    | %         | 78.3 | 32.0 | 4.7  | 15.3 | ** |
|       |          | PC 18:0/22:4     |              | Area  |  |  | 4.6  | GM      | 16.9 | 22.0 | ** | %         | 15.5 | 34.2 | 23.4 | 8.3  | ** |
|       |          | PC 20:0/20:4     |              | Area  |  |  | 11.8 | GM      | 12.5 | 50.1 | *  | %         | 6.2  | 33.8 | 1.6  | 22.9 | ** |
|       |          |                  |              | Total |  |  | 2.1  | GM      | 13.5 | 28.4 | *  |           |      |      |      |      |    |
|       |          |                  |              |       |  |  |      |         |      |      |    |           |      |      |      |      |    |
| 883.5 | PI 38:5  | PI 18:1/20:4     |              | Area  |  |  | 3.6  | Control | 3.9  | 22.5 | ** | %         | 45.5 | 66.6 | 9.2  | 18.8 |    |
|       |          | PI 18:0/20:5     |              | Area  |  |  | 8.2  | Control | 15.4 | 54.8 | ** | %         | 54.5 | 33.4 | 7.7  | 37.5 |    |
|       |          |                  |              | total |  |  | 5.2  | Control | 7.9  | 23.6 | ** |           |      |      |      |      |    |
|       |          |                  |              |       |  |  |      |         |      |      |    |           |      |      |      |      |    |
| 886.6 | PC 40:2  | PC 20:1/20:1     |              | Area  |  |  | N/A  | Control | 8.2  | 0.0  | ** | %         | 32.6 | 0.0  | 14.7 | 0.0  | ** |
|       |          | PC 18:1/22:1     |              | Area  |  |  | N/A  | Control | 15.8 | 0.0  | ** | %         | 67.4 | 0.0  | 7.1  | 0.0  | ** |
|       |          |                  |              | total |  |  | N/A  | Control | 9.6  | 0.0  | ** |           |      |      |      |      |    |
|       |          |                  |              |       |  |  |      |         |      |      |    |           |      |      |      |      |    |
| 898.6 | PC 42:10 | PC 20:5/22:5     |              | Area  |  |  | 5.0  | GM      | 31.2 | 25.7 | ** | %         | 21.3 | 32.1 | 26.6 | 11.7 |    |
|       |          | PC 20:4/22:6 (a) |              | Area  |  |  | 2.0  | GM      | 20.1 | 23.4 | *  | %         | 61.7 | 37.3 | 12.6 | 9.1  | ** |
|       |          | PC 20:4/22:6 (b) |              | Area  |  |  | 5.9  | GM      | 14.4 | 13.0 | ** | %         | 17.1 | 30.6 | 16.6 | 7.2  | ** |
|       |          |                  |              | Total |  |  | 3.3  | GM      | 13.6 | 19.2 | ** | Ratio a/b | 3.7  | 1.2  | 28.6 | 11.9 | *  |
|       |          |                  |              |       |  |  |      |         |      |      |    |           |      |      |      |      |    |
| 900.6 | PC 42:9  | PC 20:5/22:4     |              | Area  |  |  | 21.2 | GM      | 38.1 | 18.7 | ** | %         | 3.3  | 29.0 | 30.7 | 3.4  | ** |
|       |          | PC 20:3/22:6     |              | Area  |  |  | 1.8  | GM      | 10.0 | 19.6 | *  | %         | 96.7 | 71.0 | 1.0  | 1.4  | ** |
|       |          |                  |              | total |  |  | 2.4  | GM      | 10.9 | 19.2 | ** |           |      |      |      |      | ** |
|       |          |                  |              |       |  |  |      |         |      |      |    |           |      |      |      |      |    |
| 906.6 | PC 42:6  | PC 20:0/22:6 (a) |              | Area  |  |  | 1.1  | GM      | 2.1  | 19.4 |    | %         | 19.0 | 17.0 | 18.2 | 7.4  |    |
|       |          | PC 20:1/22:5     |              | Area  |  |  | 1.5  | Control | 30.4 | 26.0 |    | %         | 42.7 | 23.2 | 11.8 | 18.7 | ** |
|       |          | PC 20:0/22:6 (b) |              | Area  |  |  | 1.9  | GM      | 14.4 | 32.5 |    | %         | 38.3 | 59.8 | 4.9  | 8.5  | ** |
|       |          |                  |              | Total |  |  | 1.2  | GM      | 18.1 | 26.2 |    | Ratio b/a | 2.1  | 3.5  | 16.5 | 15.2 | *  |
|       |          |                  |              |       |  |  |      |         |      |      |    |           |      |      |      |      |    |
| 913.6 | PI 40:4  | PI 18:0/22:4     |              | Area  |  |  | 2.2  | GM      | 40.9 | 19.0 | *  | %         | 50.0 | 34.1 | 20.0 | 24.4 |    |
|       |          | PI 20:0/20:4     |              | Area  |  |  | 4.5  | GM      | 9.1  | 18.5 | ** | %         | 50.0 | 65.9 | 19.9 | 12.6 |    |
|       |          |                  |              | total |  |  | 3.3  | GM      | 20.7 | 8.3  | ** |           |      |      |      |      |    |
|       |          |                  |              |       |  |  |      |         |      |      |    |           |      |      |      |      |    |
| 926.6 | PC 44:10 | PC 22:5/22:5     |              | Area  |  |  | 5.3  | GM      | 23.1 | 16.0 | ** | %         | 67.8 | 47.8 | 14.8 | 5.0  | *  |
|       |          | PC 22:4/22:6     |              | Area  |  |  | 12.2 | GM      | 38.8 | 22.1 | ** | %         | 32.2 | 52.2 | 31.1 | 4.5  | *  |
|       |          |                  |              | total |  |  | 7.6  | GM      | 22.5 | 18.9 | ** |           |      |      |      |      |    |
