# Supplementary material for: Profiling Phospholipids within Atlantic Salmon Salmo salar with Regards to a Novel Terrestrial Omega-3 Oil Source
Source: MDPI journal article supplement (doi:10.3390/metabo12090851), 2022-09-10
Supplement: s1 [file s1]

Supplementary Table S1. SFC-QTOF analysis of brain tissue at the final time point. Simple ID was designated by SFC-QTOF, triple quad ID was determined by LC-MS/MS. Green and red represent high and low peak areas, respectively. Red triple quad IDs mean multiple acyl isomers were detected.

| m/z      | RT    | Anova (p) | q Value  | Fold | Highest | Co. | GM | CV%   | Simple ID      | Triple Quad ID           | Adducts     | Formula    | M.E (ppm) |
|----------|-------|-----------|----------|------|---------|-----|----|-------|----------------|--------------------------|-------------|------------|-----------|
| 688.5886 | 5.51  | 5.646E-08 | 6.09E-06 | 2.7  | GM      |     |    | 8.82  | Cer 42:4;O2    |                          | M-H, M+FA-H |            |           |
| 690.6045 | 5.54  | 1.534E-05 | 0.000317 | 1.6  | GM      |     |    | 7.58  | Cer 42:3;O2    |                          | M-H, M+FA-H |            |           |
| 797.5416 | 6.49  | 1.926E-07 | 1.56E-05 | 2.0  | GM      |     |    | 9.57  | MDGD 34:3      |                          | M+FA-H      | C44H79O10P | 9.718     |
| 823.5565 | 6.52  | 6.394E-07 | 4.16E-05 | 1.5  | GM      |     |    | 4.18  | MDGD 36:4      | MGDG 20:1/16:3           | M+FA-H      |            |           |
| 849.5079 | 7.13  | 0.0006657 | 0.005099 | 1.8  | GM      |     |    | 12.72 | PG 42:6        | PG 20:5/22:1             | M+H2O-H     | C50H77O10P | 0.361     |
| 777.5077 | 7.19  | 0.0001039 | 0.001188 | 1.8  | GM      |     |    | 12.61 | PG P-38:6      |                          | M-H         | C44H75O9P  | 0.197     |
| 852.6571 | 7.67  | 4.854E-06 | 0.000144 | 2.0  | GM      |     |    | 12.47 | HexCer 42:3;O2 |                          | M-H, M+FA-H |            |           |
| 850.6419 | 7.89  | 6.283E-09 | 4.32E-06 | 2.4  | GM      |     |    | 7.24  | HexCer 42:4;O2 |                          | M-H, M+FA-H |            |           |
| 852.6570 | 7.94  | 3.978E-05 | 0.000572 | 1.5  | GM      |     |    | 8.26  | HexCer 42:3;O2 |                          | M-H, M+FA-H |            |           |
| 854.6787 | 8.01  | 0.0094403 | 0.036903 | 1.3  | Control |     |    | 11.63 | HexCer 42:2;O2 |                          | M+FA-H      | C48H91NO8  | 7.487     |
| 815.4872 | 8.07  | 1.782E-07 | 1.56E-05 | 2.8  | GM      |     |    | 12.77 | PG 40:9        | PG 18:3/22:6             | M-H         | C46H73O10P | 0.371     |
| 866.6380 | 8.15  | 2.13E-08  | 4.41E-06 | 2.3  | GM      |     |    | 7.08  | HexCer 42:4;O3 |                          | M-H, M+FA-H |            |           |
| 843.5185 | 8.24  | 0.0039727 | 0.019213 | 2.3  | GM      |     |    | 21.28 | PG 42:9        |                          | M-H         | C48H77O10P | 0.416     |
| 796.5191 | 8.31  | 0.0070602 | 0.029652 | 1.4  | GM      |     |    | 5.26  | HexCer 36:5;O4 |                          | M+FA-H      |            |           |
| 960.7415 | 8.37  | 0.0036085 | 0.018272 | 1.7  | GM      |     |    | 13.56 | HexCer 46:1;O5 |                          | M+FA-H      |            |           |
| 771.5184 | 8.41  | 3.637E-09 | 4.32E-06 | 3.6  | GM      |     |    | 11.29 | PG 36:3        | PG 16:0/20:3             | M-H         | C42H77O10P | 0.327     |
| 986.7598 | 8.53  | 0.0033187 | 0.017421 | 1.6  | GM      |     |    | 11.14 | HexCer 48:2;O5 |                          | M+FA-H      |            |           |
| 988.7746 | 8.64  | 2.727E-05 | 0.000459 | 2.1  | GM      |     |    | 13.02 | HexCer 48:1;O5 |                          | M+FA-H      |            |           |
| 886.6092 | 8.68  | 8.433E-06 | 0.0002   | 1.6  | GM      |     |    | 8.14  |                |                          | Neg         |            |           |
| 966.7911 | 9.02  | 0.0167758 | 0.056003 | 1.3  | GM      |     |    | 13.51 | HexCer 50:2;O2 |                          | M+FA-H      |            |           |
| 762.5067 | 9.10  | 0.0266999 | 0.128697 | 1.2  | GM      |     |    | 8.7   | PE 38:7        | PE 18:2/20:5             | M+H, M+Na   | C43H72NO8P | -0.218    |
| 758.4773 | 9.17  | 9.896E-07 | 4.52E-05 | 2.7  | GM      |     |    | 13.35 | PE 38:8        | PE 20:5/18:3             | M-H         | C43H70NO8P | 0.933     |
| 734.4773 | 9.17  | 2.77E-05  | 0.000459 | 1.5  | Control |     |    | 7.15  | PE 36:6        | PE 16:1/20:5             | M-H         | C41H70NO8P | 0.875     |
| 838.5394 | 9.21  | 0.0540012 | 0.213886 | 1.2  | GM      |     |    | 10.51 | PE 44:11       | PE 22:5/22:6             | M+H, M+Na   | C49H76NO8P | 1.574     |
| 844.4555 | 9.25  | 0.0004184 | 0.003547 | 1.2  | GM      |     |    | 4.31  |                |                          | Neg         |            |           |
| 784.4932 | 9.26  | 7.759E-07 | 4.47E-05 | 2.5  | GM      |     |    | 13.65 | PE 40:9        | PE 18:3/22:6             | M-H         |            |           |
| 840.5510 | 9.29  | 3.691E-06 | 0.000113 | 2.0  | GM      |     |    | 7.65  | PE 44:10       | PE 22:5/22:5             | M+H         | C49H78NO8P | -3.315    |
| 810.5075 | 9.30  | 0.003596  | 0.01827  | 1.3  | GM      |     |    | 9.96  | PE 42:10       | PE 20:4/22:6             | M-H         | C47H74NO8P | -0.468    |
| 786.5084 | 9.35  | 0.0005757 | 0.004596 | 1.5  | GM      |     |    | 13.23 | PE 40:8        | PE 20:3/20:5             | M-H         | C45H74NO8P | 0.567     |
| 748.5290 | 9.39  | 0.0065188 | 0.042294 | 1.2  | GM      |     |    | 5.69  | PE O-38:7      | PE P-18:1/20:5           | M+H, M+Na   | C43H74NO7P | 1.982     |
| 856.5134 | 9.46  | 0.0016945 | 0.010522 | 1.6  | Control |     |    | 15.86 | PE 42:10       |                          | M+FA-H      |            |           |
| 738.5076 | 9.48  | 2.97E-05  | 0.000472 | 1.5  | GM      |     |    | 9.09  | PE 36:4        | PE 16:0/20:4             | M-H         | C41H74NO8P | -0.381    |
| 788.5249 | 9.48  | 0.0017282 | 0.010687 | 1.3  | Control |     |    | 8.75  | PE 40:7        | PE 20:2/20:5             | M-H         | C45H76NO8P | 1.644     |
| 812.5233 | 9.48  | 2.49E-06  | 9.17E-05 | 2.3  | GM      |     |    | 11.42 | PE 42:9        | PE 20:3/22:6             | M-H         | C47H76NO8P | -0.285    |
| 770.5135 | 9.49  | 5.291E-05 | 0.000732 | 2.0  | GM      |     |    | 14.35 | PE O-40:9      |                          | M-H         |            |           |
| 714.5085 | 9.53  | 0.000243  | 0.002335 | 1.3  | Control |     |    | 6.74  | PE 34:2        | PE 16:1/18:1             | M-H         | C39H74NO8P | 0.815     |
| 696.4980 | 9.55  | 5.848E-06 | 0.000158 | 1.4  | GM      |     |    | 7.13  | PE O-34:4      | PE P-16:0/18:3           | M-H         | C39H72NO7P | 0.876     |
| 720.4980 | 9.55  | 0.0002562 | 0.002401 | 1.3  | GM      |     |    | 5.6   | PE O-36:6      | PE P-16:0/20:5           | M-H         | C41H72NO7P | 0.865     |
| 814.5350 | 9.59  | 0.003938  | 0.019123 | 1.4  | GM      |     |    | 12.74 | PE 42:8        | PE 20:2/22:6             | M-H         | C47H78NO8P | -5.195    |
| 726.5438 | 9.61  | 0.0005622 | 0.005911 | 1.3  | GM      |     |    | 3.21  | PE O-36:4      | PE P-18:0/18:3           | M+H         | C41H76NO7P | 0.862     |
| 750.5445 | 9.62  | 0.0016192 | 0.013752 | 1.3  | GM      |     |    | 6.03  | PE O-38:6      | PE P-18:0/20:5           | M+H, M+Na   | C43H76NO7P | 1.669     |
| 728.5243 | 9.63  | 3.097E-07 | 2.34E-05 | 1.9  | Control |     |    | 6.64  | PE 35:2        |                          | M-H         | C40H76NO8P | 0.941     |
| 722.5137 | 9.68  | 0.0001146 | 0.001271 | 1.6  | GM      |     |    | 10.83 | PE O-36:5      | PE P-16:0/20:4           | M-H         | C41H74NO7P | 1.013     |
| 794.5687 | 9.69  | 0.0005923 | 0.006112 | 1.4  | GM      |     |    | 7.56  | PE 40:5        | PE 18:0/22:5   20:1/20:4 | M+H         | C45H80NO8P | -0.882    |
| 766.5367 | 9.74  | 1.872E-05 | 0.000357 | 1.5  | GM      |     |    | 3.94  | PE 38:4        | PE 18:1/20:3             | M-H         | C43H78NO8P | -3.355    |
| 776.5589 | 9.74  | 0.0169305 | 0.091752 | 1.2  | GM      |     |    | 5.43  | PE O-40:7      | PE P-18:0/22:6           | M+H         | C45H78NO7P | 0.101     |
| 742.5404 | 9.76  | 0.002232  | 0.013002 | 1.3  | Control |     |    | 10.29 | PE 36:2        | PE 18:1/18:1             | M-H         | C41H78NO8P | 1.630     |
| 810.5323 | 9.78  | 0.000443  | 0.003693 | 1.7  | Control |     |    | 12.44 | PE 42:10       |                          | M-H         | C47H74NO8P | 29.998    |
| 796.5803 | 9.82  | 6.72E-06  | 0.000171 | 1.5  | GM      |     |    | 2.2   | PE 40:4        |                          | M+H         | C45H82NO8P | -6.027    |
| 712.5292 | 9.85  | 9.281E-07 | 4.52E-05 | 1.6  | Control |     |    | 6.32  | PE O-35:3      |                          | M-H         | C40H76NO7P | 0.692     |
| 686.5134 | 9.86  | 1.679E-06 | 6.85E-05 | 1.4  | Control |     |    | 4.72  | PE O-33:2      |                          | M-H         | C38H74NO7P | 0.525     |
| 756.5522 | 9.90  | 7.045E-08 | 7.09E-06 | 1.9  | Control |     |    | 5.78  | PE 37:2        |                          | M-H         | C42H80NO8P | -3.482    |
| 750.5431 | 9.92  | 9.779E-07 | 4.52E-05 | 1.7  | GM      |     |    | 3.94  | PE O-38:5      | PE P-18:0/20:4           | M-H         | C43H78NO7P | -1.641    |
| 820.5841 | 9.95  | 1.217E-06 | 5.25E-05 | 2.2  | GM      |     |    | 4.26  | PE 42:5        | PE 20:4/22:1             | M-H         | C47H84NO8P | -2.508    |
| 770.5713 | 10.04 | 0.0003719 | 0.003243 | 1.4  | Control |     |    | 9.4   | PE 38:2        | PE 18:1/20:1             | M-H         | C43H82NO8P | 1.018     |
| 766.5399 | 10.05 | 6.618E-07 | 4.16E-05 | 2.1  | Control |     |    | 8.49  | PE 38:4        |                          | M-H         | C43H78NO8P | 0.828     |
| 776.5608 | 10.07 | 1.893E-05 | 0.000357 | 1.3  | GM      |     |    | 4.19  | PE O-40:6      | PE P-18:0/22:5           | M-H         | C45H80NO7P | 1.129     |
| 740.5550 | 10.13 | 4.999E-06 | 0.000145 | 1.4  | Control |     |    | 5.05  | PE O-37:3      |                          | M-H, M+Cl   | C38H76NO8P | -6.752    |
| 752.5604 | 10.13 | 2.26E-06  | 8.74E-05 | 1.7  | GM      |     |    | 3.66  | PE O-38:4      | PE P-18:0/20:3           | M-H         | C43H80NO7P | 0.604     |
| 820.5839 | 10.15 | 2.128E-05 | 0.000387 | 1.4  | GM      |     |    | 1.9   | PE 42:5        |                          | M-H         | C47H84NO8P | -2.727    |
| 714.5448 | 10.16 | 3.164E-06 | 0.000109 | 1.5  | Control |     |    | 4.97  | PE O-35:2      | PE P-18:0/17:1           | M-H         | C40H78NO7P | 0.613     |

|          |       |           |          |     |         |  |  |       |           |                         |           |            |        |
|----------|-------|-----------|----------|-----|---------|--|--|-------|-----------|-------------------------|-----------|------------|--------|
| 778.5762 | 10.19 | 9.762E-09 | 4.32E-06 | 2.6 | GM      |  |  | 6.47  | PE O-40:5 | PE P-18:0/22:4          | M-H       | C45H82NO7P | 0.696  |
| 794.5709 | 10.24 | 1.579E-08 | 4.32E-06 | 2.0 | Control |  |  | 3.84  | PE 40:4   | PE 18:0/22:4            | M-H       | C45H82NO8P | 0.437  |
| 848.6162 | 10.33 | 6.574E-07 | 4.16E-05 | 1.8 | GM      |  |  | 6.67  | PE 44:5   | PE 20:4/24:1            | M-H       | C49H88NO8P | -1.451 |
| 768.5559 | 10.37 | 6.627E-06 | 0.000174 | 1.7 | Control |  |  | 5.81  | PE 38:3   | PE 18:1/20:2            | M-H       | C43H80NO8P | 1.276  |
| 798.6017 | 10.37 | 0.0010356 | 0.007477 | 1.3 | Control |  |  | 9.15  | PE 40:2   | PE 18:1/22:1  20:1/20:1 | M-H       | C45H86NO8P | -0.206 |
| 702.5451 | 10.38 | 5.867E-05 | 0.00077  | 1.3 | GM      |  |  | 6.52  | PE O-34:1 |                         | M-H       | C39H78NO7P | 1.059  |
| 804.5922 | 10.38 | 2.003E-05 | 0.000368 | 1.5 | GM      |  |  | 5.78  | PE O-42:6 | PC 16:0/18:1            | M-H       | C47H84NO7P | 1.177  |
| 780.5923 | 10.44 | 7.101E-06 | 0.000176 | 1.4 | GM      |  |  | 4.83  | PE O-40:4 | PE P-18:1/22:2          | M-H       | C45H84NO7P | 1.287  |
| 857.5195 | 10.49 | 0.0003437 | 0.003069 | 1.3 | GM      |  |  | 7.85  | PI 36:4   |                         | M-H       | C45H79O13P | 1.081  |
| 796.5871 | 10.57 | 2.678E-06 | 9.62E-05 | 1.6 | Control |  |  | 4.95  | PE 40:3   | PE 18:1/22:2  20:1/20:2 | M-H       | C45H84NO8P | 1.112  |
| 867.5421 | 10.60 | 0.0231619 | 0.069044 | 1.3 | Control |  |  | 16.74 | PI O-38:6 |                         | M-H       | C47H81O12P | 3.279  |
| 859.5348 | 10.62 | 0.0010071 | 0.007314 | 1.4 | GM      |  |  | 13.33 | PI 36:3   |                         | M-H       | C45H81O13P | 0.728  |
| 869.5560 | 10.68 | 0.0041561 | 0.019845 | 1.3 | GM      |  |  | 12.26 | PI O-38:5 | PI O-18:0/20:5          | M-H       | C47H83O12P | 1.194  |
| 843.5400 | 10.69 | 0.0004631 | 0.003839 | 1.5 | GM      |  |  | 13.97 | PI O-36:4 |                         | M-H       | C45H81O12P | 0.826  |
| 885.5507 | 10.70 | 1.461E-05 | 0.000306 | 1.4 | GM      |  |  | 5.4   | PI 38:4   | PI 18:0/20:4            | M-H       | C47H83O13P | 0.913  |
| 887.5580 | 10.70 | 3.284E-05 | 0.000501 | 1.3 | GM      |  |  | 6.85  | PI 38:3   |                         | M-H       | C47H85O13P | -8.401 |
| 913.5763 | 10.79 | 2.399E-06 | 9.05E-05 | 1.6 | GM      |  |  | 8.24  | PI 40:4   |                         | M-H       | C49H87O13P | -5.255 |
| 887.5655 | 10.84 | 0.0029875 | 0.0161   | 1.4 | GM      |  |  | 11.73 | PI 38:3   |                         | M-H       | C47H85O13P | 0.003  |
| 871.5711 | 10.91 | 0.0044344 | 0.02078  | 1.4 | GM      |  |  | 14.71 | PI O-38:4 | PI O-18:0/20:4          | M-H       | C47H85O12P | 0.607  |
| 854.5674 | 14.80 | 3.831E-05 | 0.000683 | 1.9 | GM      |  |  | 10.46 | PC 42:10  | PC 20:4/22:6            | M+H       | C50H80NO8P | -2.399 |
| 828.5520 | 14.81 | 1.082E-05 | 0.00024  | 3.0 | GM      |  |  | 13.15 | PC 40:9   | PC 18:3/22:6            | M+H, M+Na | C48H78NO8P | -2.208 |
| 880.5833 | 14.93 | 0.001984  | 0.015901 | 1.3 | GM      |  |  | 4.26  | PC 44:11  | PC 22:5/22:6            | M+H       |            |        |
| 778.5369 | 15.03 | 0.0017007 | 0.014302 | 1.5 | Control |  |  | 10.68 | PC 36:6   | PC 16:1/20:5            | M+H, M+Na | C44H76NO8P | -1.597 |
| 830.5677 | 15.07 | 0.0009493 | 0.008793 | 1.8 | GM      |  |  | 18.21 | PC 40:8   | PC 18:2/22:6            | M+H       | C48H80NO8P | -2.101 |
| 856.5811 | 15.29 | 9.63E-08  | 2.05E-05 | 2.3 | GM      |  |  | 6.05  | PC 42:9   | PC 20:3/22:6            | M+H       | C50H82NO8P | -4.641 |
| 832.5869 | 15.36 | 0.0017663 | 0.01478  | 1.2 | Control |  |  | 7.74  | PC 40:7   | PC 18:1/22:6            | M+H, M+Na | C48H82NO8P | 2.179  |
| 892.5334 | 15.37 | 0.3691298 | 0.282018 | 1.1 | Control |  |  | 14.04 |           |                         | Neg       |            |        |
| 752.4630 | 15.38 | 0.4815341 | 0.322787 | 1.1 | Control |  |  | 2.97  |           | PE 17:2/20:2            | Neg       |            |        |
| 858.5958 | 15.55 | 0.000108  | 0.001511 | 1.8 | GM      |  |  | 7.75  | PC 42:8   |                         | M+H       | C50H84NO8P | -5.711 |
| 782.5699 | 15.60 | 1.275E-07 | 2.18E-05 | 2.0 | GM      |  |  | 7.33  | PC 36:4   | PC 18:3/18:1            | M+H, M+Na | C44H80NO8P | 0.565  |
| 756.5529 | 15.65 | 1.475E-09 | 1.26E-06 | 3.1 | GM      |  |  | 2.81  | PC 34:3   | PC 16:0/18:3            | M+H       | C42H78NO8P | -1.231 |
| 820.5809 | 15.77 | 1.61E-06  | 8.09E-05 | 1.8 | Control |  |  | 9.07  | PC 39:6   |                         | M+H       | C47H82NO8P | -5.060 |
| 830.5642 | 15.83 | 0.0037086 | 0.026489 | 1.3 | GM      |  |  | 6.91  | PC 40:8   |                         | M+H       | C48H80NO8P | -6.313 |
| 758.5702 | 15.94 | 0.0005644 | 0.005911 | 1.2 | GM      |  |  | 5.05  | PC 34:2   | PC 16:1/18:1            | M+H       | C42H80NO8P | 1.034  |
| 848.6087 | 15.95 | 9.816E-07 | 5.98E-05 | 2.7 | Control |  |  | 13.86 | PC 41:6   |                         | M+H       | C49H86NO8P | -9.075 |
| 810.6001 | 16.22 | 2.707E-08 | 9.24E-06 | 2.4 | GM      |  |  | 3.93  | PC 38:4   |                         | M+H       | C46H84NO8P | -0.799 |
| 886.6270 | 16.24 | 8.181E-08 | 2.05E-05 | 2.4 | GM      |  |  | 7.08  | PC 44:8   |                         | M+H       | C52H88NO8P | -5.690 |
| 836.6154 | 16.32 | 1.107E-05 | 0.000242 | 1.4 | GM      |  |  | 3.83  | PC 40:5   | PC 18:0/22:5            | M+H       | C48H86NO8P | -1.213 |
| 898.5771 | 16.33 | 0.0042945 | 0.020285 | 1.4 | Control |  |  | 13.71 | PC 42:10  |                         | M+FA-H    |            |        |
| 760.9930 | 16.41 | 0.0948962 | 0.296982 | 1.2 | GM      |  |  | 11.12 |           |                         | Pos       |            |        |
| 812.6150 | 16.42 | 4.493E-05 | 0.000752 | 1.3 | GM      |  |  | 2.96  | PC 38:3   |                         | M+H, M+K  | C46H86NO8P | -1.649 |
| 768.5867 | 16.52 | 9.731E-09 | 4.15E-06 | 2.1 | GM      |  |  | 5.4   | PC O-36:4 | PC O-16:0/20:4          | M+H       | C44H82NO7P | -4.484 |
| 888.6458 | 16.63 | 3.071E-05 | 0.00057  | 1.5 | GM      |  |  | 8.3   | PC 44:7   | PC 20:5/24:2            | M+H, M+Na | C52H90NO8P | -2.118 |
| 838.6284 | 16.77 | 3.895E-09 | 2.22E-06 | 2.4 | GM      |  |  | 4.57  | PC 40:4   | PC 18:1/22:3            | M+H       | C48H88NO8P | -4.335 |
| 914.6589 | 16.84 | 0.0004197 | 0.004564 | 1.5 | GM      |  |  | 9.93  | PC 46:8   |                         | M+H       | C54H92NO8P | -4.865 |
| 890.6261 | 16.87 | 0.1762447 | 0.194396 | 1.2 | Control |  |  | 12.09 | PC O-42:7 |                         | M+FA-H    |            |        |
| 864.6449 | 17.04 | 6.617E-07 | 5.97E-05 | 1.7 | GM      |  |  | 5.16  | PC 42:5   | PC 20:4/22:1            | M+H       | C50H90NO8P | -3.230 |
| 926.6107 | 17.15 | 6.45E-05  | 0.000818 | 1.4 | Control |  |  | 4.57  | PC 44:10  |                         | M+FA-H    |            |        |
| 840.6465 | 17.21 | 4.808E-05 | 0.000789 | 1.4 | GM      |  |  | 2.85  | PC 40:3   | PC 18:2/22:1            | M+H       | C48H90NO8P | -1.463 |
| 796.6172 | 17.27 | 1.035E-06 | 6.1E-05  | 1.9 | GM      |  |  | 2.49  | PC O-38:4 | PC O-18:0/20:4          | M+H       | C46H86NO7P | -5.417 |
| 822.6346 | 17.47 | 0.0008255 | 0.007961 | 1.3 | GM      |  |  | 5.16  | PC O-40:5 | PC O-18:0/22:5          | M+H       | C48H88NO7P | -3.061 |
| 866.6615 | 17.58 | 1.875E-07 | 2.41E-05 | 2.3 | GM      |  |  | 9.13  | PC 42:4   | PC 18:3/24:1            | M+H       | C50H92NO8P | -2.083 |
| 914.6594 | 17.61 | 8.867E-06 | 0.000205 | 2.1 | GM      |  |  | 10.85 | PC 46:8   |                         | M+H       | C54H92NO8P | -4.295 |
| 892.6789 | 17.63 | 2.199E-06 | 8.73E-05 | 2.2 | GM      |  |  | 9.92  | PC 44:5   | PC 20:4/24:1            | M+H       | C52H94NO8P | -0.111 |
| 918.6958 | 17.78 | 0.0041752 | 0.029211 | 1.3 | GM      |  |  | 6.24  | PC 46:6   | PC 24:1/22:5            | M+H, M+Na | C54H96NO8P | 1.291  |
| 868.6798 | 18.15 | 8.884E-05 | 0.001296 | 1.5 | GM      |  |  | 7.95  | PC 42:3   | PC 18:1/24:2            | M+H       | C50H94NO8P | 0.939  |
| 894.6909 | 18.21 | 2.846E-06 | 9.38E-05 | 2.0 | GM      |  |  | 11.32 | PC 44:4   | PC 20:3/24:1            | M+H       | C52H96NO8P | -4.145 |
| 920.7073 | 18.28 | 9.205E-07 | 5.98E-05 | 2.2 | GM      |  |  | 10.23 | PC 46:5   | PC 22:4/24:1            | M+H       | C54H98NO8P | -3.270 |
| 922.7012 | 18.29 | 0.0001303 | 0.001724 | 1.4 | GM      |  |  | 9.21  | PC 46:4   |                         | M+H       |            |        |
| 946.7233 | 18.68 | 0.0003365 | 0.00376  | 1.4 | GM      |  |  | 9.7   | PC 48:6   |                         | M+H, M+Na |            |        |
| 896.7077 | 19.00 | 0.0003044 | 0.003441 | 1.3 | GM      |  |  | 6.9   | PC 44:3   | PC 18:1/26:2            | M+H       | C52H98NO8P | -2.876 |

Supplementary Table S2. SFC-QTOF analysis of brain tissue at the intermediate time point. Simple ID was designated by SFC-QTOF, triple quad ID was determined by LC-MS/MS. Green and red represent high and low peak areas, respectively. Red triple quad IDs mean multiple acyl isomers were detected.

| m/z      | RT    | Anova (p) | q Value | Fold | Highest | Co. | GM | CV%   | Simple ID      | Triple Quad ID | Adducts           | Formula    | M.E (ppm) |
|----------|-------|-----------|---------|------|---------|-----|----|-------|----------------|----------------|-------------------|------------|-----------|
| 688.5892 | 5.40  | 0.0006    | 0.0500  | 2.0  | GM      |     |    | 21.96 | Cer 42:4;O2    |                | M-H, M+FA-H       |            |           |
| 690.6049 | 5.45  | 0.0080    | 0.2648  | 1.5  | GM      |     |    | 15.79 | Cer 42:3;O2    |                | M-H, M+Cl, M+FA-H |            |           |
| 797.5418 | 6.38  | 0.0220    | 0.4541  | 1.5  | GM      |     |    | 15.35 | MGDG 34:3      |                | M+FA-H            |            |           |
| 852.6579 | 7.55  | 0.0020    | 0.1077  | 1.7  | GM      |     |    | 18.52 | HexCer 42:3;O2 |                | M-H, M+FA-H       |            |           |
| 850.6421 | 7.76  | 0.0012    | 0.0850  | 1.8  | GM      |     |    | 14.41 | HexCer 42:4;O2 |                | M-H, M+FA-H       |            |           |
| 839.4884 | 7.86  | 0.0143    | 0.3658  | 2.1  | GM      |     |    | 33.3  | PG 42:11       | PG 20:5/22:6   | M-H               | C48H73O10P | 1.829     |
| 815.4877 | 7.93  | 0.0008    | 0.0608  | 2.6  | GM      |     |    | 31.73 | PG 40:9        |                | M-H               | C46H73O10P | 1.086     |
| 767.4872 | 7.98  | 0.0194    | 0.4307  | 2.2  | GM      |     |    | 31.55 | PG 36:5        |                | M-H               | C42H73O10P | 0.388     |
| 817.5034 | 7.98  | 0.0167    | 0.3990  | 1.9  | GM      |     |    | 30.21 | PG 40:8        |                | M-H               | C46H75O10P | 1.084     |
| 866.6391 | 8.02  | 0.0005    | 0.0456  | 1.8  | GM      |     |    | 15.51 | HexCer 42:4;O3 |                | M-H, M+FA-H       |            |           |
| 868.6529 | 8.08  | 0.0119    | 0.3386  | 1.4  | GM      |     |    | 16.83 | HexCer 42:3;O3 |                | M+FA-H            |            |           |
| 843.5183 | 8.10  | 0.0026    | 0.1294  | 3.0  | GM      |     |    | 38.52 | PG 42:9        |                | M-H               | C48H77O10P | 0.151     |
| 797.5315 | 8.24  | 0.0019    | 0.1062  | 2.7  | GM      |     |    | 28.58 | PG 38:4        |                | M-H               | C44H79O10P | -2.925    |
| 771.5185 | 8.25  | 0.0000    | 0.0127  | 2.4  | GM      |     |    | 15.07 | PG 36:3        |                | M-H               | C42H77O10P | 0.452     |
| 758.4771 | 8.99  | 0.0008    | 0.0607  | 1.8  | GM      |     |    | 16.84 | PE 38:8        | PE 18:3/20:5   | M-H               | C43H70NO8P | 0.679     |
| 734.4771 | 9.01  | 0.0147    | 0.3744  | 1.4  | Control |     |    | 14.81 | PE 36:6        | PE 16:1/20:5   | M-H               | C41H70NO8P | 0.681     |
| 784.4932 | 9.09  | 0.0001    | 0.0160  | 1.9  | GM      |     |    | 13.97 | PE 40:9        | PE 20:4/20:5   | M-H               | C45H72NO8P | 1.123     |
| 810.5084 | 9.12  | 0.0034    | 0.1510  | 1.5  | GM      |     |    | 14.4  | PE 42:10       | PE 20:5/22:5   | M-H               | C47H74NO8P | 0.616     |
| 786.5086 | 9.16  | 0.0164    | 0.3945  | 1.3  | GM      |     |    | 13.93 | PE 40:8        | PE 18:2/22:6   | M-H               | C45H74NO8P | 0.872     |
| 838.5391 | 9.25  | 0.0001    | 0.0170  | 2.8  | GM      |     |    | 17.41 | PE 44:10       | PE 22:5/22:5   | M-H               | C49H78NO8P | -0.109    |
| 856.5132 | 9.26  | 0.0001    | 0.0154  | 1.4  | Control |     |    | 4.61  | PE 42:10       |                | M+FA-H            |            |           |
| 788.5252 | 9.27  | 0.0062    | 0.2335  | 1.3  | Control |     |    | 4.35  | PE 40:7        | PE 20:2/20:5   | M-H               | C45H76NO8P | 2.026     |
| 738.5084 | 9.28  | 0.0000    | 0.0129  | 1.9  | GM      |     |    | 7.29  | PE 36:4        | PE 16:0/20:4   | M-H               | C41H74NO8P | 0.692     |
| 770.5135 | 9.29  | 0.0022    | 0.1149  | 1.6  | GM      |     |    | 10.95 | PE O-40:9      |                | M-H               |            |           |
| 812.5233 | 9.30  | 0.0000    | 0.0031  | 2.2  | GM      |     |    | 10.59 | PE 42:9        | PE 20:3/22:6   | M-H               | C47H76NO8P | -0.399    |
| 696.4979 | 9.36  | 0.0015    | 0.0921  | 1.5  | GM      |     |    | 12.78 | PE O-34:4      | PE P-16:0/18:3 | M-H               | C39H72NO7P | 0.803     |
| 814.5354 | 9.39  | 0.0019    | 0.1062  | 1.4  | GM      |     |    | 10.96 | PE 42:8        | PE 20:2/22:6   | M-H               | C47H78NO8P | -4.663    |
| 728.5242 | 9.44  | 0.0010    | 0.0698  | 1.5  | Control |     |    | 9.92  | PE 35:2        |                | M-H               | C40H76NO8P | 0.873     |
| 772.5294 | 9.45  | 0.0109    | 0.3231  | 1.3  | Control |     |    | 10.86 | PE O-40:8      | PE P-18:1/22:6 | M-H               | C45H76NO7P | 0.990     |
| 722.5136 | 9.47  | 0.0001    | 0.0191  | 1.6  | GM      |     |    | 8.1   | PE O-36:5      | PE P-18:0/18:4 | M-H               | C41H74NO7P | 0.804     |
| 766.5389 | 9.53  | 0.0000    | 0.0134  | 1.8  | GM      |     |    | 7.5   | PE 38:4        | PE 18:0/20:4   | M-H               | C43H78NO8P | -0.483    |
| 810.5309 | 9.55  | 0.0062    | 0.2335  | 1.4  | Control |     |    | 12.62 | PE O-40:7      |                | M-H, M+Cl         | C45H78NO7P | 12.805    |
| 712.5291 | 9.64  | 0.0016    | 0.0936  | 1.4  | Control |     |    | 10.97 | PE O-35:3      | PE O-18:2/17:1 | M-H               | C40H76NO7P | 0.656     |
| 686.5134 | 9.66  | 0.0023    | 0.1158  | 1.3  | Control |     |    | 9.11  | PE O-33:2      |                | M-H               | C38H74NO7P | 0.501     |
| 750.5442 | 9.72  | 0.0002    | 0.0195  | 1.8  | GM      |     |    | 9.47  | PE O-38:5      | PE P-18:0/20:4 | M-H               | C43H78NO7P | -0.132    |
| 820.5806 | 9.75  | 0.0000    | 0.0027  | 1.8  | GM      |     |    | 8.75  | PE 42:5        | PE 20:4/22:1   | M-H               | C47H84NO8P | -6.749    |
| 784.5419 | 9.84  | 0.0002    | 0.0272  | 1.6  | Control |     |    | 11.61 | PE 38:3;O      |                | M-H               |            |           |
| 766.5398 | 9.85  | 0.0008    | 0.0608  | 1.8  | Control |     |    | 11.69 | PE 38:4        |                | M-H               | C43H78NO8P | 0.686     |
| 796.5782 | 9.90  | 0.0018    | 0.0553  | 1.6  | GM      |     |    | 11    | PE 40:4        |                | M+H               | C45H82NO8P | -8.619    |
| 752.5581 | 9.91  | 0.0008    | 0.0610  | 1.7  | GM      |     |    | 14.64 | PE O-38:4      | PE P-18:0/20:3 | M-H               |            |           |
| 740.5551 | 9.93  | 0.0223    | 0.4562  | 1.3  | Control |     |    | 13.01 | PE O-37:3      |                | M-H               |            |           |
| 778.5757 | 9.97  | 0.0001    | 0.0154  | 2.4  | GM      |     |    | 17.73 | PE O-40:5      | PE O-20:0/20:5 | M-H               | C45H82NO7P | 0.059     |
| 794.5706 | 10.02 | 0.0003    | 0.0321  | 2.0  | Control |     |    | 13.68 | PE 40:4        | PE 18:1/22:3   | M-H               | C45H82NO8P | 0.030     |
| 848.6155 | 10.11 | 0.0015    | 0.0936  | 1.6  | GM      |     |    | 14.41 | PE 44:5        | PE 20:4/24:1   | M-H               | C49H88NO8P | -2.308    |
| 768.5558 | 10.15 | 0.0028    | 0.1346  | 1.6  | Control |     |    | 14.05 | PE 38:3        | PE 18:1/20:2   | M-H               | C43H80NO8P | 1.183     |
| 857.5195 | 10.30 | 0.0069    | 0.2411  | 1.4  | GM      |     |    | 7.28  | PI 36:4        | PI 16:0/20:4   | M-H               | C45H79O13P | 1.145     |
| 796.5866 | 10.35 | 0.0070    | 0.2411  | 1.6  | Control |     |    | 15.93 | PE 40:3        | PE 18:1/22:2   | M-H               | C45H84NO8P | 0.573     |
| 859.5313 | 10.40 | 0.0045    | 0.1867  | 1.4  | GM      |     |    | 12.23 | PI 36:3        |                | M-H, M+Cl         | C45H81O13P | -3.367    |
| 843.5398 | 10.48 | 0.0065    | 0.2387  | 1.5  | GM      |     |    | 15.61 | PI O-36:4      |                | M-H               | C45H81O12P | 0.553     |

|           |       |        |        |      |         |  |  |       |            |                |           |              |        |
|-----------|-------|--------|--------|------|---------|--|--|-------|------------|----------------|-----------|--------------|--------|
| 887.5609  | 10.48 | 0.0040 | 0.1701 | 1.3  | GM      |  |  | 10.92 | PI 38:3    |                | M-H       | C47H85O13P   | -5.179 |
| 913.5760  | 10.58 | 0.0002 | 0.0195 | 1.6  | GM      |  |  | 11.06 | PI 40:4    |                | M-H       | C49H87O13P   | -5.683 |
| 871.5707  | 10.70 | 0.0337 | 0.5484 | 1.4  | GM      |  |  | 17.87 | PI O-38:4  | PI O-18:0/20:4 | M-H       | C47H85O12P   | 0.119  |
| 1593.9771 | 11.74 | 0.0443 | 0.6073 | 1.4  | Control |  |  | 21.28 | CL 84:19   |                | M-H       | C93H144O17P2 | -2.201 |
| 786.5073  | 14.54 | 0.0000 | 0.0094 | 2.3  | GM      |  |  | 14.35 | PC 32:4;O  |                | M+FA-H    |              |        |
| 846.5289  | 14.57 | 0.0001 | 0.0163 | 2.0  | GM      |  |  | 13.58 | PC 38:8    | PC 20:5/18:3   | M+FA-H    | C46H76NO8P   | -0.258 |
| 878.5727  | 14.76 | 0.0219 | 0.3186 | 1.4  | Control |  |  | 12.73 | PC 44:12   | PC 22:6/22:6   | M+H, M+Na | C52H80NO8P   | 3.746  |
| 854.5678  | 14.85 | 0.0000 | 0.0001 | 2.3  | GM      |  |  | 9.23  | PC 42:10   | PC 20:5/22:5   | M+H       | C50H80NO8P   | -1.902 |
| 828.5515  | 14.87 | 0.0000 | 0.0001 | 2.2  | GM      |  |  | 7.04  | PC 40:9    | PC 18:3/22:6   | M+H       | C48H78NO8P   | -2.719 |
| 944.5670  | 15.01 | 0.0001 | 0.0160 | 1.7  | Control |  |  | 12.08 |            |                | Neg       |              |        |
| 778.5378  | 15.04 | 0.0001 | 0.0077 | 1.5  | Control |  |  | 8.13  | PC 36:6    | PC 14:0/22:6   | M+H, M+Na | C44H76NO8P   | -0.454 |
| 830.5687  | 15.12 | 0.0000 | 0.0013 | 1.6  | GM      |  |  | 8.94  | PC 40:8    | PC 18:2/22:6   | M+H       | C48H80NO8P   | -0.854 |
| 882.5966  | 15.18 | 0.0000 | 0.0001 | 2.5  | GM      |  |  | 9.9   | PC 44:10   | PC 22:5/22:5   | M+H       | C52H84NO8P   | -4.731 |
| 856.5817  | 15.30 | 0.0000 | 0.0001 | 2.0  | GM      |  |  | 6.66  | PC 42:9    | PC 20:3/22:6   | M+H       | C50H82NO8P   | -3.907 |
| 832.5880  | 15.39 | 0.0002 | 0.0091 | 1.6  | Control |  |  | 4.47  | PC 40:7    | PC 18:1/22:6   | M+H, M+Na | C48H82NO8P   | 3.463  |
| 792.5540  | 15.50 | 0.0062 | 0.2335 | 1.3  | GM      |  |  | 6.95  | PC 32:1;O  |                | M+FA-H    |              |        |
| 858.5968  | 15.51 | 0.0001 | 0.0049 | 1.5  | GM      |  |  | 8.54  | PC 42:8    |                | M+H       | C50H84NO8P   | -4.574 |
| 830.5641  | 15.61 | 0.0293 | 0.3969 | 1.3  | GM      |  |  | 12.12 | PC 40:8    |                | M+H       | C48H80NO8P   | -6.436 |
| 782.5708  | 15.62 | 0.0000 | 0.0002 | 2.1  | GM      |  |  | 9.23  | PC 36:4    | PC 16:0/20:4   | M+H       | C44H80NO8P   | 1.707  |
| 756.5531  | 15.65 | 0.0001 | 0.0076 | 2.1  | GM      |  |  | 9.99  | PC 34:3    | PC 16:0/18:3   | M+H       | C42H78NO8P   | -0.876 |
| 900.6100  | 15.71 | 0.0000 | 0.0000 | 15.0 | Control |  |  | 14.9  | PC 44:9;O  |                | M+H       |              |        |
| 820.5803  | 15.78 | 0.0001 | 0.0049 | 1.4  | Control |  |  | 7.89  | PC 39:6    |                | M+H       | C47H82NO8P   | -5.890 |
| 836.5814  | 15.87 | 0.0171 | 0.4028 | 1.2  | Control |  |  | 10.56 | PC O-38:6  |                | M+FA-H    | C46H82NO7P   | 0.375  |
| 848.5989  | 15.95 | 0.0000 | 0.0028 | 2.0  | Control |  |  | 8.03  |            |                | Pos       |              |        |
| 860.6159  | 15.97 | 0.0066 | 0.1369 | 1.4  | Control |  |  | 7.52  | PC 42:7    | PC 20:1/22:6   | M+H       | C50H86NO8P   | -0.604 |
| 746.5679  | 16.16 | 0.0005 | 0.0213 | 1.3  | Control |  |  | 6.7   | PC 33:1    |                | M+H       | C41H80NO8P   | -2.080 |
| 810.6012  | 16.19 | 0.0000 | 0.0020 | 2.3  | GM      |  |  | 14.36 | PC 38:4    | PC 18:0/20:4   | M+H       | C46H84NO8P   | 0.577  |
| 818.6051  | 16.20 | 0.0096 | 0.1809 | 1.5  | Control |  |  | 11.21 | PC O-40:7  | PC P-18:0/22:6 | M+H       | C48H84NO7P   | -0.881 |
| 836.6158  | 16.30 | 0.0048 | 0.1163 | 1.4  | GM      |  |  | 11.27 | PC 40:5    | PC 18:0/22:5   | M+H, M+K  | C48H86NO8P   | -0.739 |
| 768.5881  | 16.51 | 0.0000 | 0.0001 | 1.8  | GM      |  |  | 7.45  | PC O-36:4  | PC O-16:0/20:4 | M+H       | C44H82NO7P   | -2.731 |
| 838.6281  | 16.79 | 0.0000 | 0.0010 | 2.0  | GM      |  |  | 11.26 | PC 40:4    | PC 18:1/22:3   | M+H, M+Na | C48H88NO8P   | -4.700 |
| 774.6005  | 16.85 | 0.0147 | 0.2414 | 1.4  | Control |  |  | 11.33 | PC 35:1    | PC 17:0/18:1   | M+H       | C43H84NO8P   | -0.240 |
| 840.6113  | 16.96 | 0.0014 | 0.0907 | 1.7  | GM      |  |  | 12.48 | PC O-38:4  |                | M+FA-H    | C46H86NO7P   | -1.383 |
| 864.6467  | 17.02 | 0.0049 | 0.1163 | 1.4  | GM      |  |  | 11.83 | PC 42:5    | PC 20:4/22:1   | M+H       | C50H90NO8P   | -1.084 |
| 675.5373  | 17.45 | 0.0074 | 0.1488 | 1.7  | Control |  |  | 16.89 | SM 32:1;O2 |                | M+H       | C37H75N2O6P  | -9.203 |
| 866.6609  | 17.56 | 0.0035 | 0.0929 | 1.7  | GM      |  |  | 16.58 | PC 42:4    | PC 18:3/24:1   | M+H       | C50H92NO8P   | -2.780 |
| 892.6785  | 17.57 | 0.0006 | 0.0225 | 1.7  | GM      |  |  | 14.23 | PC 44:5    | PC 20:4/24:1   | M+H       | C52H94NO8P   | -0.487 |
| 882.5234  | 18.01 | 0.0024 | 0.1232 | 1.5  | GM      |  |  | 12.49 | PS 44:10   |                | M-H       | C50H78NO10P  | -6.443 |
| 894.6914  | 18.15 | 0.0076 | 0.1518 | 1.7  | GM      |  |  | 13.87 | PC 44:4    | PC 20:3/24:1   | M+H, M+K  | C52H96NO8P   | -3.618 |
| 920.7076  | 18.20 | 0.0001 | 0.0053 | 1.7  | GM      |  |  | 11.47 | PC 46:5    | PC 22:5/24:0   | M+H       | C54H98NO8P   | -2.865 |
| 832.5144  | 18.22 | 0.0121 | 0.3386 | 1.5  | Control |  |  | 13.98 | PS 40:7    | PS 18:1/22:6   | M-H       | C46H76NO10P  | 1.222  |

Supplementary Table S3. SFC-QTOF analysis of eye tissue at the final time point. Simple ID was designated by SFC-QTOF, triple quad ID was determined by LC-MS/MS. Green and red represent high and low peak areas, respectively. Red triple quad IDs mean multiple acyl isomers were detected.

| m/z       | RT    | Anova (p) | q Value | Fold | Highest | Co. | GM | CV%   | Simple ID      | Triple quad ID | Adducts           | Formula      | M.E (ppm) |
|-----------|-------|-----------|---------|------|---------|-----|----|-------|----------------|----------------|-------------------|--------------|-----------|
| 554.47965 | 4.93  | 0.0001    | 0.0008  | 1.5  | Control |     |    | 7.65  | Cer 32:1       |                | M-H, M+Cl, M+FA-H | C32H63NO3    | 1.289     |
| 801.57323 | 6.45  | 0.0238    | 0.0495  | 1.4  | Control |     |    | 19.35 | MGDG 34:1      |                | M+FA-H            | C43H80O10    | -0.155    |
| 687.49714 | 6.94  | 0.0197    | 0.0428  | 1.9  | Control |     |    | 29.25 | MGDG 34:5      |                | M+FA-H            |              |           |
| 716.53199 | 7.17  | 0.0000    | 0.0000  | 1.9  | Control |     |    | 10.38 | HexCer 32:1;O2 |                | M+FA-H            | C38H73NO8    | 0.248     |
| 716.53207 | 7.35  | 0.0000    | 0.0000  | 2.1  | Control |     |    | 12.5  | HexCer 32:1;O2 |                | M-H, M+Cl, M+FA-H |              |           |
| 852.65718 | 7.53  | 0.0007    | 0.0030  | 1.5  | GM      |     |    | 15.06 | HexCer 42:3;O2 |                | M+FA-H            |              |           |
| 882.70423 | 7.73  | 0.0150    | 0.0339  | 1.4  | Control |     |    | 14.68 | HexCer 44:2;O2 |                | M-H, M+FA-H       | C50H95NO8    | 0.305     |
| 819.51882 | 8.02  | 0.0013    | 0.0050  | 1.5  | Control |     |    | 12.75 | PG 40:7        |                | M-H               |              |           |
| 882.70286 | 8.03  | 0.0001    | 0.0008  | 1.6  | Control |     |    | 11    | HexCer 44:2;O2 |                | M-H, M+FA-H       | C50H95NO8    | -1.322    |
| 880.65308 | 8.13  | 0.0000    | 0.0001  | 1.8  | Control |     |    | 6.24  | HexCer 44:3;O2 |                | M-H, M+FA-H       |              |           |
| 908.68583 | 8.29  | 0.0509    | 0.0918  | 1.4  | Control |     |    | 22.74 | HexCer 45:4;O3 |                | M+FA-H            |              |           |
| 898.6992  | 8.30  | 0.0001    | 0.0008  | 1.6  | Control |     |    | 13.66 | HexCer 44:2;O3 |                | M+FA-H            |              |           |
| 924.71507 | 8.37  | 0.0003    | 0.0017  | 1.5  | GM      |     |    | 11.21 | HexCer 46:3;O3 |                | M+FA-H            |              |           |
| 591.39044 | 8.88  | 0.0000    | 0.0001  | 2.6  | GM      |     |    | 18.79 |                |                | Neg               |              |           |
| 760.49213 | 9.02  | 0.0063    | 0.0175  | 1.2  | GM      |     |    | 6.14  | PE 38:7        | PE 18:3/20:4   | M-H               | C43H72NO8P   | -0.195    |
| 784.49258 | 9.03  | 0.0000    | 0.0000  | 2.7  | GM      |     |    | 8.82  | PE 40:9        | PE 18:3/22:6   | M-H               | C45H72NO8P   | 0.388     |
| 810.5081  | 9.07  | 0.0000    | 0.0002  | 1.6  | GM      |     |    | 9.23  | PE 42:10       | PE 20:4/22:6   | M-H               | C47H74NO8P   | 0.216     |
| 786.50817 | 9.10  | 0.0000    | 0.0002  | 1.5  | GM      |     |    | 7.62  | PE 40:8        | PE 18:2/22:6   | M-H               | C45H74NO8P   | 0.311     |
| 838.53231 | 9.12  | 0.0025    | 0.0085  | 1.5  | GM      |     |    | 12.81 | PE 44:10       |                | M-H               | C49H78NO8P   | -8.242    |
| 774.50814 | 9.13  | 0.0000    | 0.0000  | 2.5  | Control |     |    | 5.19  | PE 39:7        |                | M-H               |              |           |
| 744.49756 | 9.16  | 0.0000    | 0.0001  | 2.0  | GM      |     |    | 11.5  | PE O-38:8      |                | M-H               |              |           |
| 738.50793 | 9.23  | 0.0000    | 0.0000  | 2.3  | GM      |     |    | 6.95  | PE 36:4        | PC 16:0/20:4   | M-H               | C41H74NO8P   | 0.008     |
| 788.52441 | 9.24  | 0.0003    | 0.0013  | 1.3  | Control |     |    | 7.07  | PE 40:7        | PE 18:1/22:6   | M-H               | C45H76NO8P   | 1.057     |
| 856.51401 | 9.24  | 0.0000    | 0.0000  | 1.5  | Control |     |    | 5.49  |                |                | Neg               |              |           |
| 770.51307 | 9.25  | 0.0000    | 0.0000  | 2.5  | GM      |     |    | 6.83  | PE O-40:9      | PE P-18:2/22:6 | M-H               |              |           |
| 812.52294 | 9.25  | 0.0000    | 0.0000  | 2.5  | GM      |     |    | 10.36 | PE 42:9        | PE 20:3/22:6   | M-H               | C47H76NO8P   | -0.788    |
| 814.53397 | 9.34  | 0.0000    | 0.0000  | 1.5  | GM      |     |    | 6.62  | PE 42:8        | PE 20:2/22:6   | M-H               | C47H78NO8P   | -6.447    |
| 722.51013 | 9.34  | 0.0018    | 0.0106  | 1.5  | GM      |     |    | 15.47 | PE O-36:6      | PE P-16:0/20:5 | M+H               | C41H72NO7P   | -2.471    |
| 748.52794 | 9.34  | 0.0314    | 0.0911  | 1.3  | Control |     |    | 12.57 | PE O-38:7      | PE O-18:3/20:4 | M+H, M+Na         | C43H74NO7P   | 0.494     |
| 728.52398 | 9.38  | 0.0000    | 0.0000  | 3.8  | Control |     |    | 6.81  | PE 35:2        | PE 17:1/18:1   | M-H               |              |           |
| 772.52946 | 9.39  | 0.0000    | 0.0000  | 1.4  | Control |     |    | 3.64  | PE O-40:8      | PE P-18:1/22:6 | M-H               | C45H76NO7P   | 1.028     |
| 750.53547 | 9.39  | 0.0000    | 0.0001  | 1.6  | GM      |     |    | 3.11  | PE O-38:5      | PE P-18:0/20:4 | M-H               | C43H78NO7P   | -11.769   |
| 722.51321 | 9.40  | 0.0000    | 0.0000  | 2.7  | GM      |     |    | 8.13  | PE O-36:5      | PE P-16:0/20:4 | M-H               | C41H74NO7P   | 0.272     |
| 766.53875 | 9.48  | 0.0000    | 0.0000  | 2.2  | GM      |     |    | 5.85  | PE 38:4        | PE 18:0/20:4   | M-H               | C43H78NO8P   | -0.623    |
| 816.553   | 9.48  | 0.0000    | 0.0002  | 1.4  | GM      |     |    | 5.56  | PE 42:7        | PE 20:1/22:6   | M-H               | C47H80NO8P   | -2.299    |
| 742.53954 | 9.50  | 0.0075    | 0.0197  | 1.3  | Control |     |    | 11.06 | PE 36:2        | PE 18:1/18:1   | M-H               | C41H78NO8P   | 0.415     |
| 716.52397 | 9.53  | 0.0000    | 0.0003  | 1.3  | Control |     |    | 4.75  | PE 34:1        | PE 16:0/18:1   | M-H               | C39H76NO8P   | 0.544     |
| 748.52899 | 9.56  | 0.0003    | 0.0015  | 1.5  | GM      |     |    | 11.31 | PE O-38:6      | PE O-18:2/20:4 | M-H               | C43H76NO7P   | 0.440     |
| 712.52878 | 9.59  | 0.0000    | 0.0000  | 2.4  | Control |     |    | 7.26  | PE O-35:3      |                | M-H               | C40H76NO7P   | 0.167     |
| 792.55416 | 9.61  | 0.0002    | 0.0013  | 1.4  | GM      |     |    | 8.36  | PE 40:5        | PE 18:0/22:5   | M-H               | C45H80NO8P   | -0.902    |
| 818.56867 | 9.61  | 0.0001    | 0.0005  | 1.5  | GM      |     |    | 9.5   | PE 42:6        | PE 20:1/22:5   | M-H               | C47H82NO8P   | -2.272    |
| 796.55116 | 9.64  | 0.0000    | 0.0001  | 2.1  | Control |     |    | 4.55  |                |                | M-H               |              |           |
| 774.54488 | 9.67  | 0.0050    | 0.0145  | 1.3  | GM      |     |    | 10.48 | PE O-40:7      | PE P-18:0/22:6 | M-H               | C45H78NO7P   | 0.726     |
| 750.5444  | 9.68  | 0.0000    | 0.0000  | 2.9  | GM      |     |    | 12.66 | PE O-38:5      | PE O-18:2/20:3 | M-H               | C43H78NO7P   | 0.119     |
| 794.5491  | 9.71  | 0.0001    | 0.0004  | 1.5  | GM      |     |    | 9.49  |                |                | Neg               |              |           |
| 728.55909 | 9.74  | 0.0016    | 0.0094  | 1.6  | Control |     |    | 17.04 | PE O-36:3      | PE P-18:0/18:2 | M+H               | C41H78NO7P   | 0.301     |
| 810.5624  | 9.76  | 0.0000    | 0.0000  | 2.4  | Control |     |    | 4.07  | PE 40:4;O      |                | M-H               |              |           |
| 818.57023 | 9.76  | 0.0000    | 0.0000  | 2.5  | GM      |     |    | 11.16 | PE 42:6        |                | M-H               | C47H82NO8P   | -0.361    |
| 770.5708  | 9.77  | 0.0002    | 0.0011  | 1.5  | Control |     |    | 9.19  | PE 38:2        | PE 18:1/20:1   | M-H               | C43H82NO8P   | 0.349     |
| 776.56045 | 9.82  | 0.0021    | 0.0075  | 1.5  | GM      |     |    | 14.98 | PE O-40:6      | PE P-18:0/22:5 | M-H               | C45H80NO7P   | 0.626     |
| 794.57091 | 9.97  | 0.0001    | 0.0005  | 2.6  | Control |     |    | 5.68  | PE 40:4        | PE 18:0/22:4   | M-H               | C45H82NO8P   | 0.483     |
| 754.57597 | 10.01 | 0.0011    | 0.0044  | 1.5  | Control |     |    | 10.88 | PE O-38:3      |                | M-H               | C43H82NO7P   | 0.467     |
| 838.59582 | 10.04 | 0.0000    | 0.0002  | 2.9  | Control |     |    | 10.93 | PE 42:4;O      |                | M-H               |              |           |
| 885.55078 | 10.42 | 0.0013    | 0.0050  | 1.3  | GM      |     |    | 8.77  | PI 38:4        | PI 18:0/20:4   | M-H               | C47H83O13P   | 1.045     |
| 861.54923 | 10.44 | 0.0001    | 0.0006  | 2.1  | Control |     |    | 16.03 | PI 36:2        |                | M-H               | C45H83O13P   | -0.717    |
| 911.56279 | 10.49 | 0.0023    | 0.0079  | 1.5  | GM      |     |    | 16.43 | PI 40:5        |                | M-H               | C49H85O13P   | -2.976    |
| 1473.9801 | 12.44 | 0.0001    | 0.0006  | 1.8  | GM      |     |    | 15.33 | CL 74:9        |                | M-2H, M-H         | C83H144O17P2 | -0.342    |
| 1449.983  | 12.55 | 0.0072    | 0.0191  | 1.4  | Control |     |    | 13.74 | CL 72:7        |                | M-2H, M-H         | C81H144O17P2 | 1.633     |
| 1403.9974 | 13.12 | 0.0000    | 0.0002  | 2.2  | Control |     |    | 17.21 | CL 68:2        |                | M-2H, M-H         | C77H146O17P2 | 0.803     |
| 802.53871 | 14.52 | 0.0001    | 0.0012  | 2.5  | GM      |     |    | 20.44 | PC 38:8        | PC 18:3/20:5   | M+H               |              |           |
| 828.55374 | 14.65 | 0.0000    | 0.0003  | 2.5  | GM      |     |    | 17.41 | PC 40:9        | PC 18:3/22:6   | M+H, M+Na         | C48H78NO8P   | -0.052    |

|           |       |        |        |      |         |  |  |       |            |                |              |             |        |
|-----------|-------|--------|--------|------|---------|--|--|-------|------------|----------------|--------------|-------------|--------|
| 854.56948 | 14.67 | 0.0004 | 0.0034 | 2.1  | GM      |  |  | 19.21 | PC 42:10   | PC 20:5/22:5   | M+H          | C50H80NO8P  | 0.054  |
| 752.52444 | 14.73 | 0.0000 | 0.0001 | 4.5  | Control |  |  | 23.24 | PC 34:5    | PC 14:0/20:5   | M+H          | C42H74NO8P  | 2.601  |
| 778.53833 | 14.81 | 0.0005 | 0.0037 | 2.1  | Control |  |  | 23.4  | PC 36:6    | PC 18:3/18:3   | M+H, M+Na    | C44H76NO8P  | 0.256  |
| 830.57019 | 14.92 | 0.0007 | 0.0050 | 1.9  | GM      |  |  | 17.65 | PC 40:8    | PC 18:3/22:5   | M+H          | C48H80NO8P  | 0.910  |
| 856.58302 | 14.96 | 0.0000 | 0.0002 | 2.7  | GM      |  |  | 17.35 | PC 42:9    | PC 20:3/22:6   | M+H          | C50H82NO8P  | -2.413 |
| 882.59672 | 15.03 | 0.0000 | 0.0004 | 2.1  | GM      |  |  | 16.26 | PC 44:10   | PC 22:5/22:5   | M+H          | C52H84NO8P  | -4.549 |
| 894.59803 | 15.06 | 0.0000 | 0.0000 | 4.6  | Control |  |  | 19.51 | PC 45:11   |                | M+H          |             |        |
| 754.53695 | 15.10 | 0.0097 | 0.0384 | 1.4  | Control |  |  | 14.88 | PC 34:4    | PC 16:1/18:3   | M+H          | C42H76NO8P  | -1.568 |
| 792.55474 | 15.10 | 0.0000 | 0.0003 | 2.1  | Control |  |  | 14.61 | PC 37:6    |                | M+H          | C45H78NO8P  | 1.211  |
| 704.52158 | 15.18 | 0.0000 | 0.0000 | 5.0  | Control |  |  | 13.32 | PC 30:1    | PC 14:0/16:1   | M+H, M+Na    | C38H74NO8P  | -1.284 |
| 678.50523 | 15.25 | 0.0000 | 0.0000 | 11.4 | Control |  |  | 14.9  | PC 28:0    | PC 14:0/14:0   | M+H, M+Na    | C36H72NO8P  | -2.361 |
| 730.539   | 15.25 | 0.0000 | 0.0001 | 2.2  | Control |  |  | 13.19 | PC 32:2    | PC 14:0/18:2   | M+H          | C40H76NO8P  | 1.191  |
| 832.587   | 15.25 | 0.0022 | 0.0124 | 1.6  | Control |  |  | 18.22 | PC 40:7    | PC 18:1/22:6   | M+H, M+Na    | C48H82NO8P  | 2.310  |
| 522.35456 | 15.26 | 0.0009 | 0.0063 | 1.5  | Control |  |  | 13.98 | LPC 18:1   |                | M+H          |             |        |
| 858.59865 | 15.39 | 0.0030 | 0.0158 | 1.5  | GM      |  |  | 15.83 | PC 42:8    |                | M+Na, M+K    | C48H86NO8P  | 0.391  |
| 794.56319 | 15.42 | 0.0000 | 0.0001 | 2.3  | Control |  |  | 12.99 | PC 37:5    | PC 17:0/20:5   | M+H-H2O, M+K | C43H82NO7P  | 22.687 |
| 782.57031 | 15.45 | 0.0000 | 0.0002 | 2.0  | GM      |  |  | 11.81 | PC 36:4    | PC 18:1/18:3   | M+H, M+Na    | C44H80NO8P  | 1.126  |
| 756.5548  | 15.50 | 0.0000 | 0.0001 | 2.2  | GM      |  |  | 10.81 | PC 34:3    | PC 16:0/18:3   | M+H, M+Na    | C42H78NO8P  | 1.342  |
| 820.58036 | 15.63 | 0.0001 | 0.0009 | 1.8  | Control |  |  | 15.18 | PC 39:6    |                | M+H          | C47H82NO8P  | -5.755 |
| 764.55649 | 15.66 | 0.0000 | 0.0006 | 1.8  | Control |  |  | 7.67  | PC O-36:6  |                | M+H          |             |        |
| 732.55521 | 15.71 | 0.0000 | 0.0002 | 1.9  | Control |  |  | 11.73 | PC 32:1    | PC 16:0/16:1   | M+H, M+Na    | C40H78NO8P  | 1.951  |
| 784.58599 | 15.71 | 0.0169 | 0.0586 | 1.3  | Control |  |  | 14.41 | PC 36:3    | PC 18:1/18:2   | M+H          | C44H82NO8P  | 1.163  |
| 714.53952 | 15.73 | 0.0000 | 0.0001 | 2.9  | Control |  |  | 16.41 | PC O-32:3  |                | M+H          |             |        |
| 848.612   | 15.77 | 0.0000 | 0.0000 | 4.4  | Control |  |  | 14.19 | PC 41:6    |                | M+H, M+Na    | C49H86NO8P  | -5.174 |
| 860.61548 | 15.80 | 0.0210 | 0.0680 | 1.3  | GM      |  |  | 16.82 | PC 42:7    | PC 20:1/22:6   | M+H, M+Na    | C50H86NO8P  | -1.053 |
| 706.53746 | 15.81 | 0.0000 | 0.0000 | 3.0  | Control |  |  | 11.82 | PC 30:0    | PC 14:0/16:0   | M+H, M+Na    | C38H76NO8P  | -0.953 |
| 792.59124 | 15.87 | 0.0000 | 0.0002 | 2.4  | Control |  |  | 11.14 | PC O-38:6  | PC P-18:0/20:5 | M+H          | C46H82NO7P  | 1.356  |
| 784.58131 | 15.89 | 0.0001 | 0.0004 | 1.3  | Control |  |  | 4.13  |            |                | Neg          |             |        |
| 832.5955  | 15.89 | 0.0000 | 0.0002 | 1.5  | Control |  |  | 4.42  | PC 36:1    | PC 16:0/20:1   | M+FA-H       |             |        |
| 772.58248 | 15.89 | 0.0000 | 0.0001 | 2.1  | Control |  |  | 11.72 | PC 35:2    |                | M+H          | C43H82NO8P  | -3.376 |
| 746.56994 | 15.97 | 0.0000 | 0.0001 | 2.1  | Control |  |  | 13.28 | PC 33:1    |                | M+H          | C41H80NO8P  | 0.680  |
| 766.57474 | 16.00 | 0.0023 | 0.0126 | 1.5  | Control |  |  | 11.28 | PC O-36:5  | PC O-16:0/20:5 | M+H          | C44H80NO7P  | 0.297  |
| 810.60166 | 16.02 | 0.0000 | 0.0002 | 2.1  | GM      |  |  | 12.71 | PC 38:4    | PC 18:0/20:4   | M+H          | C46H84NO8P  | 1.151  |
| 818.60425 | 16.02 | 0.0000 | 0.0000 | 2.7  | Control |  |  | 11.04 | PC O-40:7  | PC P-18:0/22:6 | M+H, M+Na    | C48H84NO7P  | -1.913 |
| 836.61463 | 16.04 | 0.0055 | 0.0249 | 1.4  | GM      |  |  | 11.4  | PC 40:5    | PC 18:0/22:5   | M+H          | C48H86NO8P  | -2.093 |
| 862.63031 | 16.08 | 0.0006 | 0.0047 | 1.5  | GM      |  |  | 12.11 | PC 42:6    |                | M+H, M+Na    | C50H88NO8P  | -1.997 |
| 792.59115 | 16.12 | 0.0001 | 0.0012 | 1.8  | Control |  |  | 12.26 | PC O-38:6  |                | M+H          | C46H82NO7P  | 1.245  |
| 786.60215 | 16.13 | 0.0001 | 0.0014 | 1.5  | Control |  |  | 10.58 | PC 36:2    | PC 18:1/18:1   | M+H          | C44H84NO8P  | 1.800  |
| 838.62583 | 16.15 | 0.0000 | 0.0000 | 2.1  | GM      |  |  | 10.49 | PC 40:4    | PC 20:0/20:4   | M+H          | C48H88NO8P  | -7.399 |
| 760.99388 | 16.24 | 0.0055 | 0.0249 | 1.8  | Control |  |  | 23.29 |            | PC 16:0/18:1   | Pos          |             |        |
| 768.58809 | 16.34 | 0.0000 | 0.0003 | 1.7  | GM      |  |  | 10.64 | PC O-36:4  | PC O-16:0/20:4 | M+H          | C44H82NO7P  | -2.709 |
| 778.56158 | 16.45 | 0.0003 | 0.0015 | 1.3  | GM      |  |  | 6.32  | PC 32:0    | PC 16:0/16:0   | M+FA-H       | C40H80NO8P  | 1.659  |
| 744.58711 | 16.51 | 0.0011 | 0.0070 | 1.4  | Control |  |  | 7.25  | PC O-34:2  | PC P-18:1/16:0 | M+H          | C42H82NO7P  | -4.115 |
| 774.59788 | 16.68 | 0.0000 | 0.0001 | 2.1  | Control |  |  | 11.13 | PC 35:1    |                | M+H          |             |        |
| 718.57258 | 16.71 | 0.0000 | 0.0005 | 2.0  | Control |  |  | 14.12 | PC O-32:1  | PC O-14:0/18:1 | M+H, M+Na    | C40H80NO7P  | -2.697 |
| 814.6273  | 16.89 | 0.0013 | 0.0082 | 1.5  | Control |  |  | 11.93 | PC 38:2    | PC 18:1/20:1   | M+H          |             |        |
| 864.64334 | 16.92 | 0.0000 | 0.0000 | 2.1  | GM      |  |  | 11.05 | PC 42:5    | PC 20:0/22:5   | M+H          | C50H90NO8P  | -5.026 |
| 737.54726 | 17.19 | 0.0002 | 0.0012 | 1.3  | Control |  |  | 5.82  | SM 32:0;03 |                | M+FA-H       |             |        |
| 772.62188 | 17.20 | 0.0016 | 0.0096 | 1.5  | Control |  |  | 14.35 | PC O-36:2  | PC P-18:0/18:1 | M+H          | C44H86NO7P  | 0.541  |
| 675.54419 | 17.23 | 0.0001 | 0.0009 | 1.9  | Control |  |  | 16.63 | SM 32:1;02 |                | M+H, M+Na    | C37H75N2O6P | 0.940  |
| 746.60558 | 17.42 | 0.0119 | 0.0449 | 1.4  | Control |  |  | 17.52 | PC O-34:1  | PC O-16:0/18:1 | M+H, M+Na    | C42H84NO7P  | -0.318 |
| 1020.7382 | 18.00 | 0.0044 | 0.0211 | 1.7  | GM      |  |  | 18.06 | PC 54:11   |                | M+H          |             |        |
| 832.51384 | 18.15 | 0.0000 | 0.0001 | 1.7  | Control |  |  | 10.43 | PS 40:7    | PS 18:1/22:6   | M-H          | C46H76NO10P | 0.519  |
| 920.70849 | 18.36 | 0.0000 | 0.0000 | 1.8  | GM      |  |  | 7.68  | PC 46:5    | PC 20:5/26:1   | M+H          | C54H98NO8P  | -1.951 |
| 810.52616 | 18.89 | 0.0000 | 0.0003 | 1.8  | GM      |  |  | 14.24 | PS 38:4    |                | M-H          | C44H78NO10P | -3.574 |
| 786.5297  | 19.23 | 0.0001 | 0.0004 | 1.5  | Control |  |  | 5.95  | PS 36:2    |                | M-H          | C42H78NO10P | 0.820  |
| 760.51365 | 19.49 | 0.0001 | 0.0005 | 1.5  | Control |  |  | 9.68  | PS 34:1    | PS 16:0/18:1   | M-H          | C40H76NO10P | 0.323  |
| 855.66007 | 19.60 | 0.0002 | 0.0011 | 1.3  | GM      |  |  | 6.83  | SM 42:3;02 |                | M+FA-H       | C47H91N2O6P | 0.480  |
| 898.72515 | 19.91 | 0.0001 | 0.0010 | 1.6  | Control |  |  | 11.57 | PC 44:2    | PC 22:1/22:1   | M+H, M+Na    | C52H100NO8P | -0.869 |
| 883.69146 | 20.97 | 0.0000 | 0.0000 | 1.6  | GM      |  |  | 7.35  | SM 44:3;02 |                | M+FA-H       |             |        |
| 926.7551  | 21.32 | 0.0000 | 0.0002 | 2.5  | Control |  |  | 17.89 | PC 46:2    |                | M+H          | C54H104NO8P | -2.305 |

Supplementary Table S4. SFC-QTOF analysis of eye tissue at the intermediate time point. Simple ID was designated by SFC-QTOF, triple quad ID was determined by LC-MS/MS. Green and red represent high and low peak areas, respectively. Red triple quad IDs mean multiple acyl isomers were detected.

| m/z      | RT    | Anova (p) | q Value   | Fold | Highest | Co. | GM | CV%   | Simple ID      | Triple quad ID           | Adducts     | Formula    | M.E (ppm) |
|----------|-------|-----------|-----------|------|---------|-----|----|-------|----------------|--------------------------|-------------|------------|-----------|
| 531.3182 | 6.27  | 1.553E-05 | 0.0004023 | 3.5  | Control |     |    | 21.92 | MGDG 18:1      |                          | M-H         | C27H48O10  | 1.418     |
| 773.5426 | 6.28  | 0.0072616 | 0.0322138 | 1.6  | Control |     |    | 19.44 | MGDG 32:1      |                          | M-H, M+FA-H | C41H76O10  | 0.709     |
| 801.5732 | 6.41  | 0.012584  | 0.0473477 | 1.6  | Control |     |    | 15.33 | MGDG 34:1      | MGDG 16:0/18:1           | M+FA-H      | C43H80O10  | -0.260    |
| 913.6988 | 7.05  | 0.0003491 | 0.0033675 | 2.1  | Control |     |    | 19.58 | MGDG 42:1      |                          | M+FA-H      | C51H96O10  | 0.307     |
| 716.5325 | 7.13  | 0.0014743 | 0.0098823 | 1.6  | Control |     |    | 17.73 | HexCer 32:1;O2 |                          | M+FA-H      | C38H73NO8  | 0.973     |
| 716.5324 | 7.29  | 6.282E-05 | 0.001009  | 1.9  | Control |     |    | 13.59 | HexCer 32:1;O2 |                          | M+FA-H      | C38H73NO8  | 0.788     |
| 852.6574 | 7.47  | 0.0006441 | 0.0052346 | 1.7  | GM      |     |    | 17.48 | HexCer 42:3;O2 |                          | M+FA-H      |            |           |
| 880.6878 | 7.60  | 0.0001356 | 0.0017359 | 1.7  | GM      |     |    | 13.47 | HexCer 44:3;O2 |                          | M-H, M+FA-H |            |           |
| 882.7045 | 7.95  | 0.0024715 | 0.0144601 | 1.5  | Control |     |    | 15.71 | HexCer 44:2;O2 |                          | M+FA-H      | C50H95NO8  | 0.602     |
| 908.7198 | 8.03  | 0.0004783 | 0.004286  | 1.7  | GM      |     |    | 12.31 | HexCer 46:3;O2 |                          | M+FA-H      |            |           |
| 898.6994 | 8.21  | 0.00105   | 0.0076548 | 1.6  | Control |     |    | 15.19 | HexCer 44:2;O3 |                          | M+FA-H      |            |           |
| 924.7154 | 8.29  | 0.0057707 | 0.0272535 | 1.4  | GM      |     |    | 15.94 | HexCer 46:3;O3 |                          | M+FA-H      |            |           |
| 784.4929 | 8.91  | 1.514E-05 | 0.0003996 | 2.0  | GM      |     |    | 10.16 | PE 40:9        | PE 18:3/22:6             | M-H         | C45H72NO8P | 0.741     |
| 810.5083 | 8.96  | 0.0004843 | 0.0043054 | 1.9  | GM      |     |    | 9.83  | PE 42:10       | PE 20:4/22:6             | M-H         | C47H74NO8P | 0.407     |
| 786.5085 | 8.99  | 0.0029869 | 0.0166804 | 1.4  | GM      |     |    | 12.39 | PE 40:8        | PE 18:2/22:6             | M-H         | C45H74NO8P | 0.706     |
| 774.5087 | 9.02  | 1.627E-07 | 2.408E-05 | 2.9  | Control |     |    | 11.53 | PE 39:7        | PE 17:1/22:6             | M-H         | C44H74NO8P | 0.990     |
| 838.5324 | 9.02  | 0.0006351 | 0.0051822 | 2.2  | GM      |     |    | 16.29 | PE 44:10       | PE 22:5/22:5             | M-H         |            |           |
| 744.4977 | 9.04  | 1.617E-06 | 9.176E-05 | 2.1  | GM      |     |    | 10.7  | PE O-38:8      | PE P-18:2/20:5           | M-H         |            |           |
| 812.5226 | 9.04  | 1.349E-05 | 0.0003764 | 2.3  | GM      |     |    | 7.8   | PE 42:9        | PE 20:3/22:6             | M-H         |            |           |
| 738.5083 | 9.11  | 2.001E-08 | 6.812E-06 | 2.7  | GM      |     |    | 9.09  | PE 36:4        | PE 16:0/20:4             | M-H         |            |           |
| 765.5257 | 9.11  | 0.0090207 | 0.0379214 | 1.3  | GM      |     |    | 7.4   | EPC 40:6;O4    |                          | M-H         |            |           |
| 788.5255 | 9.12  | 0.00054   | 0.0046907 | 1.4  | Control |     |    | 6.96  | PE 40:7        | PE 18:1/22:6             | M-H         | C45H76NO8P | 2.411     |
| 856.5117 | 9.12  | 2.953E-06 | 0.0001468 | 1.6  | Control |     |    | 7.51  |                |                          | M-H         |            |           |
| 770.5132 | 9.13  | 1.235E-06 | 7.785E-05 | 2.6  | GM      |     |    | 14.41 | PE O-40:9      | PE P-18:2/22:6           | M-H         |            |           |
| 720.4979 | 9.19  | 0.0055843 | 0.0265571 | 1.4  | GM      |     |    | 14.42 | PE O-36:6      | PE P-16:0/20:5           | M-H         | C41H72NO7P | 0.740     |
| 814.5350 | 9.22  | 0.0016425 | 0.0107347 | 1.3  | GM      |     |    | 7.82  | PE 42:8        | PE 20:2/22:6             | M-H         | C47H78NO8P | -5.194    |
| 728.5240 | 9.26  | 2.082E-09 | 5.818E-06 | 3.9  | Control |     |    | 8.24  | PE 35:2        |                          | M-H         | C40H76NO8P | 0.529     |
| 764.5233 | 9.26  | 0.0002353 | 0.0025244 | 1.5  | GM      |     |    | 8.23  | PE 38:5        | PE 18:1/20:4             | M-H         | C43H76NO8P | -0.326    |
| 772.5299 | 9.27  | 6.631E-05 | 0.0010551 | 1.5  | Control |     |    | 9.7   | PE O-40:8      | PE P-18:1/22:6           | M-H         | C45H76NO7P | 1.625     |
| 722.5131 | 9.28  | 5.97E-09  | 5.818E-06 | 2.9  | GM      |     |    | 8.23  | PE O-36:5      | PE P-16:0/20:4           | M-H         | C41H74NO7P | 0.177     |
| 748.5283 | 9.28  | 2.927E-07 | 3.115E-05 | 1.9  | GM      |     |    | 7.52  | PE O-38:6      | PE P-18:0/20:5           | M-H         | C43H76NO7P | -0.435    |
| 766.5392 | 9.36  | 1.158E-08 | 6.571E-06 | 2.5  | GM      |     |    | 4.36  | PE 38:4        | PE 18:0/20:4             | M-H         | C43H78NO8P | -0.052    |
| 742.5385 | 9.38  | 0.0093257 | 0.038915  | 1.7  | Control |     |    | 11.84 | PE 36:2        | PE 18:1/18:1             | M-H         | C41H78NO8P | -0.980    |
| 716.5241 | 9.39  | 0.0012051 | 0.0086029 | 1.4  | Control |     |    | 10.05 | PE 34:1        | PE 16:0/18:1             | M-H         | C39H76NO8P | 0.792     |
| 748.5291 | 9.44  | 0.0182029 | 0.0615515 | 1.4  | GM      |     |    | 11.92 | PE O-38:6      | PE P-18:1/20:4           | M-H         | C43H76NO7P | 0.580     |
| 824.5762 | 9.44  | 0.0269203 | 0.0811202 | 2.2  | Control |     |    | 46.64 | PE O-44:10     |                          | M-H         |            |           |
| 712.5289 | 9.46  | 1.494E-07 | 2.348E-05 | 3.0  | Control |     |    | 12.94 | PE O-35:3      |                          | M-H         | C39H72NO8P |           |
| 768.5544 | 9.48  | 0.0014362 | 0.0097158 | 1.3  | Control |     |    | 7.29  | PE 38:3        | PE 18:1/20:2   18:2/20:1 | M-H         | C43H80NO8P | -0.649    |
| 792.5539 | 9.48  | 0.000332  | 0.0032673 | 1.7  | GM      |     |    | 10.54 | PE 40:5        | PE 20:1/20:4   18:0/22:5 | M-H         | C45H80NO8P | -1.218    |
| 856.6043 | 9.50  | 0.0037753 | 0.0199613 | 2.6  | Control |     |    | 39.67 |                |                          | Neg         |            |           |
| 796.5451 | 9.51  | 0.0001306 | 0.0017112 | 1.6  | Control |     |    | 11.45 | PE O-42:10     |                          | M-H         |            |           |
| 756.5396 | 9.53  | 4.541E-06 | 0.0001979 | 2.0  | Control |     |    | 8.59  | PE 37:2        |                          | M-H, M+FA-H |            |           |
| 842.5446 | 9.54  | 0.0065856 | 0.0298594 | 1.2  | Control |     |    | 5.34  | PE 44:8        |                          | M-H         |            |           |
| 750.5437 | 9.54  | 8.317E-07 | 5.664E-05 | 2.5  | GM      |     |    | 2.74  | PE O-38:5      | PE P-18:0/20:4           | M-H         | C43H78NO7P | -0.815    |
| 726.5463 | 9.59  | 0.0275423 | 0.0825561 | 1.4  | Control |     |    | 7.36  | PE O-36:3      | PE P-18:1/18:1           | M-H         | C41H78NO7P | 2.726     |
| 794.5474 | 9.59  | 0.000952  | 0.0070936 | 1.4  | GM      |     |    | 8.87  | PE 40:4        | PE 18:0/22:4             | M-H         | C45H82NO8P | -29.088   |
| 810.5611 | 9.63  | 5.892E-05 | 0.0009599 | 2.1  | Control |     |    | 16.42 | PE 40:4;O      |                          | M-H         |            |           |
| 818.5700 | 9.63  | 5.58E-08  | 1.267E-05 | 2.2  | GM      |     |    | 7.71  | PE 42:6        | PE 20:0/22:6             | M-H         | C47H82NO8P | -0.692    |
| 770.5708 | 9.64  | 0.0012436 | 0.0087669 | 2.0  | Control |     |    | 10.88 | PE 38:2        | PE 18:1/20:1             | M-H         | C43H82NO8P | 0.404     |
| 478.2935 | 9.73  | 5.624E-05 | 0.0009301 | 2.3  | Control |     |    | 11.22 | LPE 18:1       |                          | M-H         | C23H46NO7P | -0.805    |
| 794.5709 | 9.85  | 0.0004862 | 0.0043057 | 2.3  | Control |     |    | 20.1  | PE 40:4        |                          | M-H         | C45H82NO8P | 0.497     |
| 754.5755 | 9.88  | 0.0091002 | 0.0381613 | 1.6  | Control |     |    | 9.67  | PE O-38:3      | PE P-18:1/20:1           | M-H         | C43H82NO7P | -0.187    |
| 798.5988 | 9.93  | 0.0002346 | 0.0025244 | 3.0  | Control |     |    | 11.06 | PE 40:2        | PE 20:1/20:1             | M-H         | C45H86NO8P | -3.745    |
| 812.5790 | 9.93  | 0.4177675 | 0.3487455 | 1.2  | GM      |     |    | 16.86 | PE 40:3;O      |                          | M-H         |            |           |
| 855.5049 | 10.02 | 0.0072254 | 0.0321609 | 1.8  | Control |     |    | 21.24 | PI 36:5        |                          | M-H, M+FA-H |            |           |



|           |       |           |           |     |         |  |  |       |            |                |                      |              |        |
|-----------|-------|-----------|-----------|-----|---------|--|--|-------|------------|----------------|----------------------|--------------|--------|
| 907.5352  | 10.08 | 0.000598  | 0.004966  | 1.8 | Control |  |  | 15.44 | PI 40:7    | PI 16:0/24:6   | M-H2O-H, M-H, M+FA-H |              |        |
| 883.5345  | 10.20 | 0.0102791 | 0.0412748 | 1.6 | Control |  |  | 16.31 | PI 38:5    | PI 18:0/20:5   | M-H                  | C47H81O13P   | 0.355  |
| 861.5496  | 10.28 | 4.936E-05 | 0.0008532 | 2.8 | Control |  |  | 17.75 | PI 36:2    | PI 18:1/18:1   | M-H                  | C45H83O13P   | -0.311 |
| 1403.9980 | 12.88 | 0.002822  | 0.0161225 | 2.1 | Control |  |  | 22.63 | CL 68:2    |                | M-2H, M-H            | C77H146O17P2 | 1.216  |
| 812.5207  | 14.37 | 0.0092211 | 0.0385257 | 1.6 | GM      |  |  | 25.99 |            |                | Neg                  |              |        |
| 796.5153  | 14.44 | 1.897E-05 | 0.0004582 | 2.2 | Control |  |  | 16.88 | PC 34:5    |                | M+FA-H               | C42H74NO8P   | 2.556  |
| 822.5300  | 14.50 | 0.0002358 | 0.0025244 | 1.7 | Control |  |  | 15.85 | PC 36:6    | PC 16:1/20:5   | M+FA-H               | C44H76NO8P   | 1.189  |
| 802.5381  | 14.60 | 0.0003349 | 0.0012863 | 2.2 | GM      |  |  | 20.13 | PC 38:8    | PC 18:3/20:5   | M+H                  |              | -0.066 |
| 874.5599  | 14.62 | 0.0015493 | 0.0102445 | 1.6 | GM      |  |  | 16.94 | PC 40:8    | PC 18:3/22:5   | M+FA-H               | C48H80NO8P   | -0.541 |
| 828.5527  | 14.71 | 0.0053264 | 0.0078164 | 1.7 | GM      |  |  | 19.26 | PC 40:9    | PC 18:3/22:6   | M+H, M+Na            |              | -1.311 |
| 938.5900  | 14.71 | 3.604E-08 | 1.023E-05 | 4.1 | Control |  |  | 14    | PC 45:11   |                | M+FA-H               |              |        |
| 854.5683  | 14.72 | 0.0004743 | 0.0016628 | 2.6 | GM      |  |  | 24.15 | PC 42:10   | PC 20:4/22:6   | M+H, M+Na            |              | -1.346 |
| 784.4686  | 14.79 | 0.6856003 | 0.4568537 | 1.1 | Control |  |  | 15.06 | PC 32:5;0  |                | M+FA-H               |              |        |
| 748.5114  | 14.80 | 9.215E-06 | 0.0003046 | 1.8 | Control |  |  | 8.4   | PC 30:1    | PC 14:0/16:1   | M+FA-H               |              |        |
| 876.5759  | 14.85 | 5.063E-05 | 0.000862  | 1.8 | Control |  |  | 13.15 | PC 40:7    | PC 20:2/20:5   | M+FA-H               | C48H82NO8P   | -0.149 |
| 856.5816  | 14.98 | 0.0001257 | 0.000656  | 2.5 | GM      |  |  | 20.4  | PC 42:9    | PC 20:4/22:5   | M+H                  |              | -4.107 |
| 852.5735  | 15.00 | 0.0005644 | 0.0048335 | 1.4 | GM      |  |  | 10.53 | PC 38:5    | PC 16:0/22:5   | M+FA-H               | C46H82NO8P   | -3.145 |
| 882.5928  | 15.05 | 0.0004631 | 0.0016431 | 2.3 | GM      |  |  | 20.74 | PC 44:10   |                | M+H                  |              | -8.947 |
| 766.5378  | 15.10 | 6.783E-09 | 5.818E-06 | 2.2 | GM      |  |  | 4.59  |            | PS P-16:0/20:4 | Neg                  |              |        |
| 894.5527  | 15.12 | 9.602E-07 | 6.411E-05 | 1.8 | GM      |  |  | 5.59  | PC O-43:12 |                | M+FA-H               |              |        |
| 800.5450  | 15.17 | 0.0001835 | 0.002154  | 1.5 | GM      |  |  | 10.78 | PC 34:3    | PC 16:0/18:3   | M+H, M+FA-H          | C42H78NO8P   | 0.452  |
| 776.5459  | 15.34 | 3.528E-05 | 0.0006788 | 1.6 | Control |  |  | 10.84 | PC 32:1    | PC 16:0/16:1   | M+FA-H               | C40H78NO8P   | 1.610  |
| 938.5393  | 15.40 | 0.0391338 | 0.1050068 | 1.4 | GM      |  |  | 20.34 | PC 44:12;0 |                | M+FA-H               |              |        |
| 690.5079  | 15.44 | 4.538E-07 | 4.067E-05 | 2.3 | Control |  |  | 10.14 |            |                | Neg                  |              |        |
| 750.5299  | 15.45 | 1.331E-05 | 0.0003745 | 1.7 | Control |  |  | 10.86 | PC 30:0    | PC 14:0/16:0   | M+FA-H               | C38H76NO8P   | 1.154  |
| 836.5812  | 15.48 | 6.209E-05 | 0.001002  | 1.4 | Control |  |  | 7.57  | PC O-38:6  | PC P-18:0/20:5 | M+FA-H               | C46H82NO7P   | 0.183  |
| 782.5694  | 15.52 | 8.931E-06 | 0.0001243 | 2.1 | GM      |  |  | 10.49 | PC 36:4    | PC 18:2/18:2   | M+H, M+Na            |              | -0.076 |
| 790.5600  | 15.59 | 0.0013541 | 0.0092898 | 1.6 | Control |  |  | 18.14 | PC 33:1    |                | M+FA-H               | C41H80NO8P   | -0.502 |
| 862.5967  | 15.64 | 5.305E-08 | 1.267E-05 | 2.9 | Control |  |  | 8.71  | PC O-40:7  | PC P-18:0/22:6 | M+FA-H               | C48H84NO7P   | -0.066 |
| 830.5916  | 15.71 | 0.0004345 | 0.0040093 | 1.6 | Control |  |  | 5.57  | PC 36:2    | PC 18:1/18:1   | M+FA-H               | C44H84NO8P   | -0.085 |
| 744.5553  | 15.83 | 0.0064584 | 0.0294791 | 1.3 | Control |  |  | 9.71  |            |                | Neg                  |              |        |
| 848.6128  | 15.85 | 2.055E-07 | 1.655E-05 | 6.4 | Control |  |  | 17.19 | PC 41:6    |                | M+H, M+Na            |              | -4.249 |
| 758.5697  | 15.87 | 3.284E-05 | 0.000654  | 1.5 | Control |  |  | 9.42  |            |                | Neg                  |              |        |
| 810.5993  | 16.09 | 0.0001851 | 0.0008491 | 1.9 | GM      |  |  | 13.65 | PC 38:4    | PC 18:0/20:4   | M+H                  |              | -1.794 |
| 818.5913  | 16.34 | 5.036E-05 | 0.000862  | 1.9 | Control |  |  | 13.17 | PC 35:1    | PC 17:0/18:1   | M+FA-H               | C44H86NO10P  | -0.379 |
| 768.5871  | 16.38 | 6.692E-07 | 2.57E-05  | 1.8 | GM      |  |  | 3.92  | PC O-36:4  | PC O-16:0/20:4 | M+H                  |              | -3.982 |
| 762.5656  | 16.45 | 0.000373  | 0.0035182 | 1.9 | Control |  |  | 9.81  | PC O-32:1  |                | M+FA-H               | C40H80NO7P   | 0.241  |
| 858.6231  | 16.61 | 0.0012693 | 0.0088916 | 1.8 | Control |  |  | 9.9   | PC 38:2    | PC 18:1/20:1   | M+FA-H               | C46H88NO8P   | 0.131  |
| 838.6283  | 16.69 | 6.021E-06 | 9.498E-05 | 2.4 | GM      |  |  | 12.86 | PC 40:4    | PC 20:3/20:1   | M+H                  |              | -4.411 |
| 900.5970  | 16.77 | 0.2525255 | 0.262615  | 1.1 | Control |  |  | 8.41  |            |                | Neg                  |              |        |
| 846.5985  | 16.80 | 5.022E-06 | 0.000206  | 1.9 | Control |  |  | 6.68  |            |                | Neg                  |              |        |
| 816.6122  | 16.91 | 0.0209228 | 0.0680495 | 1.5 | Control |  |  | 12.76 | PC O-36:2  | PC P-18:0/18:1 | M+FA-H               | C44H86NO7P   | -0.283 |
| 659.5139  | 16.94 | 0.000828  | 0.0063358 | 1.7 | Control |  |  | 14.15 |            |                | Neg                  |              |        |
| 719.5351  | 16.95 | 0.0015494 | 0.0102445 | 1.6 | Control |  |  | 15.74 | SM 32:1    |                | M+FA-H               | C37H75N2O6P  | 0.902  |
| 790.5969  | 17.20 | 0.0155505 | 0.0551571 | 1.5 | Control |  |  | 11.39 | PC O-34:1  | PC O-16:0/18:1 | M+FA-H               | C42H84NO7P   | 0.252  |
| 892.6758  | 17.50 | 0.0602643 | 0.0361679 | 1.7 | GM      |  |  | 20.91 | PC 44:5    | PC 20:4/24:1   | M+H                  |              | -3.514 |
| 886.6541  | 17.54 | 0.0041562 | 0.0214104 | 2.3 | Control |  |  | 19.15 | PC 40:2    | PC 40:2        | M+FA-H               | C48H92NO8P   | -0.240 |
| 832.5140  | 17.78 | 3.83E-06  | 0.0001787 | 2.3 | Control |  |  | 10.41 | PS 40:7    | PS 18:1/22:6   | M-H                  | C46H76NO10P  | 0.727  |
| 806.4984  | 17.89 | 0.0067744 | 0.0305931 | 1.4 | Control |  |  | 12.76 | PS 38:6    | PS 16:0/22:6   | M-H                  | C44H74NO10P  | 0.832  |
| 786.5298  | 18.96 | 4.527E-05 | 0.0008023 | 1.6 | Control |  |  | 10.19 | PS 36:2    | PS 18:1/18:1   | M-H                  | C42H78NO10P  | 0.896  |
| 760.5138  | 19.07 | 0.0057215 | 0.0270586 | 1.6 | Control |  |  | 17.93 | PS 34:1    | PS 16:0/18:1   | M-H                  | C40H76NO10P  | 0.515  |
| 855.6602  | 19.34 | 0.0021487 | 0.0129497 | 1.4 | GM      |  |  | 11.93 | SM 42:3;02 |                | M+FA-H               | C47H91N2O6P  | 0.682  |
| 922.7110  | 19.37 | 8.205E-05 | 0.000545  | 1.3 | GM      |  |  | 5.4   | PC O-44:2  |                | M+H, M+K             |              | 9.549  |
| 942.7144  | 19.84 | 0.0003218 | 0.0031947 | 1.8 | Control |  |  | 6.76  | PC 44:2    |                | M+FA-H               | C52H100NO8P  | -2.714 |
| 814.5592  | 20.53 | 7.798E-05 | 0.0012125 | 1.9 | Control |  |  | 15.98 | PS 38:2    | PS 18:1/20:1   | M-H                  | C43H80NO8P   | -1.558 |
| 883.6917  | 20.62 | 0.000104  | 0.0014788 | 1.7 | GM      |  |  | 13.41 | SM 44:3;02 |                | M+FA-H               |              |        |
| 788.5447  | 20.86 | 0.0240876 | 0.0755251 | 1.3 | Control |  |  | 12.2  | PS 36:1    | PS 18:0/18:1   | M-H                  | C42H80NO10P  | -0.068 |
| 970.7462  | 21.31 | 5.118E-05 | 0.000867  | 2.5 | Control |  |  | 16.1  | PC 46:2    |                | M+FA-H               |              |        |



Supplementary Table S5. SFC-QTOF analysis of gill tissue at the final time point. Simple ID was designated by SFC-QTOF, triple quad ID was determined by LC-MS/MS. Green and red represent high and low peak areas, respectively. Red triple quad IDs mean multiple acyl isomers were detected.

| m/z      | RT    | Anova (p) | q Value  | Fold | Highest | Co. | GM | CV%   | Simple ID       | Triple Quad ID         | Adducts            | Formula     | M.E. (ppm) |
|----------|-------|-----------|----------|------|---------|-----|----|-------|-----------------|------------------------|--------------------|-------------|------------|
| 554.4801 | 4.95  | 4.087E-05 | 0.000207 | 1.8  | Control |     |    | 6.52  | Cer 32:1;O2     |                        | M-H, M+Cl, M+FA-H  | C32H63NO3   | 2.085      |
| 556.4900 | 4.95  | 0.0006184 | 0.000958 | 1.6  | Control |     |    | 13.05 | Cer 32:0;O2     |                        | M+FA-H             | C32H65NO3   | -8.990     |
| 572.4907 | 5.24  | 0.0420679 | 0.019971 | 1.3  | Control |     |    | 18.14 |                 |                        | M-H, M+FA-H        |             |            |
| 664.5894 | 5.35  | 0.0258846 | 0.013532 | 1.3  | GM      |     |    | 16.76 | Cer 40:2;O2     |                        | M-H, M+FA-H        | C40H77NO3   | 1.348      |
| 702.6048 | 5.52  | 0.0117669 | 0.007743 | 1.6  | Control |     |    | 10.57 | Cer 43:4;O2     |                        | M-H, M+FA-H        |             |            |
| 708.6157 | 5.69  | 0.0001987 | 0.000478 | 2.0  | GM      |     |    | 16.6  | Cer 42:2;O3     |                        | M-H, M+FA-H        | C42H81NO4   | 1.353      |
| 854.6725 | 7.86  | 0.0002019 | 0.000478 | 1.8  | Control |     |    | 11.6  | HexCer 42:2;O2  |                        | M-H, M+FA-H        | C48H91NO8   | -0.237     |
| 767.4874 | 7.87  | 0.0435584 | 0.020522 | 2.1  | Control |     |    | 7.78  | PG 36:5         | PG 16:0/20:5           | M-H                | C42H73O10P  | 0.711      |
| 793.5035 | 7.96  | 0.0585066 | 0.0259   | 1.9  | Control |     |    | 14.25 | PG 38:6         | PG 16:0/22:6           | M-H                | C44H75O10P  | 1.274      |
| 819.5186 | 7.97  | 0.0003389 | 0.000664 | 4.2  | Control |     |    | 11.35 | PG 40:7         | PG 18:1/22:6           | M-H                | C46H77O10P  | 0.565      |
| 747.5192 | 8.14  | 0.000117  | 0.000399 | 2.3  | Control |     |    | 13.98 | PG 34:1         | PG 16:0/18:1           | M-H                | C40H77O10P  | 1.403      |
| 773.5323 | 8.14  | 0.0038271 | 0.003451 | 2.1  | Control |     |    | 10.3  | PG 36:2         | PG 18:1/18:1           | M-H                | C42H79O10P  | -1.969     |
| 888.6250 | 8.56  | 0.00291   | 0.002902 | 1.5  | Control |     |    | 10.19 | SHexCer 42:2;O2 |                        | M-H                |             |            |
| 736.4921 | 9.10  | 0.003716  | 0.003405 | 4.1  | Control |     |    | 29.22 | PE 36:5         | PE 16:0/20:5           | M-H                | C41H72NO8P  | -0.259     |
| 762.5088 | 9.19  | 0.005041  | 0.004196 | 2.6  | Control |     |    | 28.96 | PE 38:6         | PE 18:1/20:5           | M-H                | C43H74NO8P  | 1.169      |
| 788.5245 | 9.19  | 7.393E-05 | 0.0003   | 5.6  | Control |     |    | 24.08 | PE 40:7         | PE 18:1/22:6           | M-H                | C45H76NO8P  | 1.149      |
| 746.5134 | 9.25  | 0.0040638 | 0.003593 | 3.6  | Control |     |    | 26.06 | PE O-38:7       | PE P-18:1/20:5         | M-H                | C43H74NO7P  | 0.559      |
| 764.5241 | 9.33  | 0.0077844 | 0.005655 | 2.9  | Control |     |    | 28.75 | PE 38:5         | PE 16:0/22:5           | M-H                | C43H76NO8P  | 0.646      |
| 772.5296 | 9.34  | 0.0002049 | 0.000478 | 4.8  | Control |     |    | 25.69 | PE O-40:8       | PE P-18:1/22:6         | M-H                | C45H76NO7P  | 1.250      |
| 790.5402 | 9.44  | 0.0109013 | 0.007383 | 2.3  | Control |     |    | 28.35 | PE 40:6         | PE 18:0/22:6           | M-H                | C45H78NO8P  | 1.202      |
| 742.5381 | 9.45  | 4.991E-06 | 5.06E-05 | 8.8  | Control |     |    | 21.39 | PE 36:2         | PE 18:1/18:1           | M-H                | C41H78NO8P  | -1.522     |
| 774.5426 | 9.46  | 0.0012604 | 0.001615 | 5.2  | Control |     |    | 24.29 | PE O-40:7       | PE P-18:1/22:5         | M-H                | C45H78NO7P  | -2.171     |
| 716.5231 | 9.47  | 0.0002587 | 0.000528 | 4.5  | Control |     |    | 29.82 | PE 34:1         | PE 16:0/18:1           | M-H                | C39H76NO8P  | -0.713     |
| 726.5444 | 9.65  | 1.212E-06 | 2.81E-05 | 13.7 | Control |     |    | 16.23 | PE O-36:3       | PE P-18:1/18:1         | M-H                | C41H78NO7P  | 0.150      |
| 802.5392 | 14.14 | 0.0079223 | 0.043711 | 1.8  | GM      |     |    | 24.72 | PC 38:8         | PC 18:3/20:5           | M+H                | C46H76NO8P  | 1.291      |
| 828.5497 | 14.26 | 0.0016791 | 0.016747 | 1.8  | GM      |     |    | 17.01 | PC 40:9         | PC 18:3/22:6           | M+H, M+K           | C48H78NO8P  | -4.988     |
| 752.5211 | 14.29 | 0.0001563 | 0.003801 | 2.6  | Control |     |    | 18.65 | PC 34:5         | PC 14:0/20:5           | M+H                | C42H74NO8P  | -1.902     |
| 778.5391 | 14.42 | 0.002813  | 0.022539 | 1.7  | Control |     |    | 16.21 | PC 36:6         | PC 16:1/20:5           | M+H                | C44H76NO8P  | 1.260      |
| 830.5691 | 14.47 | 0.009026  | 0.047242 | 1.6  | GM      |     |    | 23.32 | PC 40:8         | PC 18:2/22:6           | M+H                | C48H80NO8P  | -0.400     |
| 766.5346 | 14.49 | 0.0012253 | 0.013707 | 1.8  | Control |     |    | 13.07 | PC 35:5         |                        | M+H                | C43H76NO8P  | -4.571     |
| 894.5972 | 14.62 | 0.0001681 | 0.003962 | 2.6  | Control |     |    | 16.97 | PC 45:11        |                        | M+H, M+Na          | C52H96NO8P  | -3.912     |
| 730.5382 | 14.67 | 0.0111952 | 0.053006 | 1.4  | Control |     |    | 12.36 | PC 32:2         | PC 16:1/16:1           | M+H-H2O, M+H, M+K  | C40H76NO8P  | 0.160      |
| 704.5235 | 14.70 | 1.084E-06 | 0.000134 | 3.3  | Control |     |    | 13.45 | PC 30:1         | PC 14:0/16:1           | M+H, M+Na          | C38H74NO8P  | 1.413      |
| 678.5030 | 14.77 | 2.672E-08 | 9.53E-06 | 6.9  | Control |     |    | 15.64 | PC 28:0         | PC 14:0/14:0           | M+H, M+Na          | C36H72NO8P  | -5.710     |
| 832.5860 | 14.78 | 0.010224  | 0.049938 | 1.5  | Control |     |    | 17.89 | PC 40:7         | PC 18:1/22:6           | M+H, M+Na          | C48H82NO8P  | 1.065      |
| 844.5523 | 14.85 | 0.0089849 | 0.047199 | 1.5  | Control |     |    | 13.15 | PC 40:9;O       |                        | M+H                |             |            |
| 738.5224 | 14.90 | 0.0012511 | 0.013924 | 1.7  | Control |     |    | 14.1  |                 |                        | Pos                |             |            |
| 858.5961 | 14.93 | 0.029971  | 0.091774 | 1.4  | GM      |     |    | 16.36 | PC 42:8         |                        | M+H                | C48H86NO8P  | -2.606     |
| 794.5547 | 14.93 | 0.000821  | 0.010742 | 1.8  | Control |     |    | 13.28 | PC 37:5         |                        | M+H                | C46H84NO7P  | -18.500    |
| 718.5369 | 14.95 | 0.0005108 | 0.007914 | 1.5  | Control |     |    | 10.95 | PC 31:1         |                        | M+H                | C39H76NO8P  | -1.726     |
| 782.5702 | 14.95 | 0.005048  | 0.033643 | 1.6  | GM      |     |    | 12.41 | PC 36:4         | PC 18:1/18:3           | M+H, M+Na          | C44H80NO8P  | 0.972      |
| 756.5538 | 14.98 | 0.0001921 | 0.004182 | 2.0  | GM      |     |    | 18.22 | PC 34:3         | PC 16:0/18:3           | M+H                | C42H78NO8P  | -0.017     |
| 692.5214 | 15.02 | 5.461E-08 | 1.66E-05 | 4.4  | Control |     |    | 13.2  | PC 29:0         |                        | M+H                | C37H74NO8P  | -1.614     |
| 764.5556 | 15.03 | 3.285E-05 | 0.001442 | 2.0  | Control |     |    | 11.82 | PC O-36:6       |                        | M+H                | C44H78NO7P  | -4.269     |
| 820.5821 | 15.12 | 9.782E-05 | 0.002937 | 1.9  | Control |     |    | 15.4  | PC 39:6         |                        | M+H                | C47H82NO8P  | -3.657     |
| 824.5454 | 15.14 | 0.0130583 | 0.008243 | 1.6  | Control |     |    | 7.66  | PC 36:5         | PC 16:0/20:5           | M+FA-H             | C44H78NO8P  | 0.871      |
| 732.5542 | 15.19 | 8.608E-05 | 0.002728 | 1.9  | Control |     |    | 11.93 | PC 32:1         | PC 16:0/16:1           | M+H-H2O, M+H, M+Na | C40H78NO8P  | 0.548      |
| 496.3403 | 15.24 | 0.0035241 | 0.026315 | 1.4  | GM      |     |    | 12.76 | LPC 16:0        |                        | M+H-H2O, M+H, M+Na | C24H50NO7P  | 1.022      |
| 848.6092 | 15.26 | 3.79E-05  | 0.00159  | 2.4  | Control |     |    | 12.21 | PC 41:6         |                        | M+H                | C49H86NO8P  | -8.447     |
| 500.5611 | 15.29 | 0.0061219 | 0.004743 | 1.5  | Control |     |    | 8.93  | PC 38:6         | PC 18:1/20:5           | M+FA-H             | C46H80NO8P  | 0.889      |
| 706.5383 | 15.29 | 4.011E-07 | 5.96E-05 | 3.2  | Control |     |    | 10.98 | PC 30:0         | PC 14:0/16:0           | M+H, M+Na          | C38H76NO8P  | 0.187      |
| 772.5813 | 15.36 | 6.067E-05 | 0.002166 | 1.9  | Control |     |    | 13.62 | PC 35:2         |                        | M+H                | C43H82NO8P  | -4.957     |
| 746.5692 | 15.44 | 0.0001802 | 0.004078 | 1.7  | Control |     |    | 13.93 | PC 33:1         |                        | M+H                | C41H80NO8P  | -0.295     |
| 766.5740 | 15.47 | 0.0244733 | 0.081381 | 1.4  | Control |     |    | 17.88 | PC O-36:5       |                        | M+H                | C44H80NO7P  | -0.722     |
| 810.5996 | 15.49 | 0.0058199 | 0.036448 | 1.5  | GM      |     |    | 13.9  | PC 38:4         | PC 18:1/20:3           | M+H                | C46H84NO8P  | -1.437     |
| 818.6034 | 15.50 | 0.0001893 | 0.004168 | 2.3  | Control |     |    | 20.19 | PC O-40:7       |                        | M+H, M+Na          | C48H84NO7P  | -2.992     |
| 716.5506 | 15.52 | 7.04E-06  | 0.000515 | 1.9  | Control |     |    | 9.38  | PC O-32:2       |                        | M+H                | C40H78NO7P  | -11.566    |
| 720.5526 | 15.55 | 0.0003808 | 0.006487 | 1.5  | Control |     |    | 10.29 | PC 31:0         |                        | M+H                | C39H78NO8P  | -1.625     |
| 690.5378 | 15.58 | 8.836E-09 | 6.07E-06 | 3.9  | Control |     |    | 4.18  | PC O-30:1       |                        | M+H, M+Na          | C38H76NO7P  | -7.827     |
| 786.6015 | 15.59 | 0.0002515 | 0.004962 | 1.9  | Control |     |    | 14.74 | PC 36:2         | PC 18:1/18:1           | M+H                | C44H84NO8P  | 0.980      |
| 550.3855 | 15.59 | 0.000797  | 0.010574 | 1.6  | GM      |     |    | 7.78  | LPC 20:1        |                        | M+H, M+Na          | C28H56NO7P  | -2.219     |
| 792.5889 | 15.59 | 0.0026765 | 0.021876 | 1.8  | Control |     |    | 18.88 | PC O-38:6       | PC P-18:0/20:5         | M+H                | C46H82NO7P  | -1.618     |
| 774.5986 | 16.05 | 0.0001899 | 0.004168 | 1.7  | Control |     |    | 13.22 | PC 35:1         | PC 18:0/17:1 18:1/17:0 | M+H                | C43H84NO8P  | -2.716     |
| 718.5722 | 16.09 | 1.058E-05 | 0.00069  | 2.2  | Control |     |    | 14.19 | PC O-32:1       |                        | M+H                | C40H80NO7P  | -3.271     |
| 804.5767 | 16.21 | 0.0002243 | 0.000484 | 1.6  | Control |     |    | 12.72 | PC 34:1         | PC 16:0/18:1           | M+FA-H             | C42H82NO8P  | 0.922      |
| 872.5626 | 16.22 | 0.0001328 | 0.000412 | 1.7  | Control |     |    | 14.23 |                 |                        | Neg                |             |            |
| 552.4004 | 16.25 | 7.099E-07 | 9.64E-05 | 2.7  | GM      |     |    | 9.18  | LPC 20:0        |                        | M+H                | C28H58NO7P  | -3.585     |
| 508.3750 | 16.31 | 0.0003485 | 0.006175 | 1.5  | Control |     |    | 10.04 | LPC O-18:1      |                        | M+H, M+Na          | C26H54NO6P  | -2.220     |
| 772.6197 | 16.54 | 1.699E-06 | 0.000186 | 2.9  | Control |     |    | 14.68 | PC O-36:2       | PC P-18:0/18:1         | M+H                | C44H86NO7P  | -2.311     |
| 675.5426 | 16.61 | 0.0001277 | 0.003437 | 1.7  | Control |     |    | 6.93  | SM 32:1;O2      |                        | M+H, M+Na          | C37H75N2O6P | -1.338     |
| 746.6042 | 16.75 | 9.95E-05  | 0.002942 | 1.8  | Control |     |    | 10.19 | PC O-34:1       | PC P-18:0/16:0         | M+H                | C42H84NO7P  | -2.205     |
| 832.6078 | 17.13 | 0.0005312 | 0.000846 | 1.5  | Control |     |    | 10.2  | PC 36:1         | PC 18:0/18:1           | M+FA-H             | C44H86NO8P  | 0.643      |
| 870.6938 | 17.88 | 0.0074619 | 0.041948 | 1.7  | Control |     |    | 20.57 | PC 42:2         |                        | M+H, M+Na          | C50H96NO8P  | -0.945     |
| 811.6676 | 18.65 | 0.0042618 | 0.029658 | 1.3  | GM      |     |    | 8.93  | SM 42:3;O2      |                        | M+H-H2O, M+H       | C47H91N2O6P | -1.477     |
| 806.4938 | 18.81 | 0.0125603 | 0.008048 | 2.1  | Control |     |    | 28.68 | PS 38:6         |                        | M-H                | C44H74NO10P | -4.933     |
| 834.5268 | 19.55 | 0.0134566 | 0.008429 | 2.0  | Control |     |    | 27.14 | PS 40:6         | PS 18:0/22:6           | M-H                | C46H78NO10P | -2.743     |

Supplementary Table S6. SFC-QTOF analysis of gill tissue at the intermediate time point. Simple ID was designated by SFC-QTOF, triple quad ID was determined by LC-MS/MS. Green and red represent high and low peak areas, respectively. Red triple quad IDs mean multiple acyl isomers were detected.

| m/z      | RT    | Anova (p) | q Value  | Fold | Highest | Co. | GM | CV%   | Simple ID   | Triple Quad ID           | Adducts            | Formula    | M.E. (ppm) |
|----------|-------|-----------|----------|------|---------|-----|----|-------|-------------|--------------------------|--------------------|------------|------------|
| 644.5982 | 5.70  | 6.39E-05  | 0.000121 | 1.7  | GM      |     |    | 9.05  | Cer 42:3;O2 |                          | M-H, M+Cl          |            |            |
| 690.6029 | 5.70  | 7.28E-06  | 2.27E-05 | 1.8  | GM      |     |    | 11.67 | Cer 44:4;O  |                          | M-H, M+Cl, M+FA-H  |            |            |
| 708.6142 | 5.98  | 1.69E-08  | 2.43E-07 | 2.7  | GM      |     |    | 6.41  | Cer 42:2;O3 |                          | M-H, M+FA-H        |            |            |
| 829.6971 | 6.54  | 6.99E-08  | 4.79E-07 | 2.8  | GM      |     |    | 11.33 |             |                          | Pos                |            |            |
| 888.6236 | 8.73  | 0.002376  | 0.002417 | 1.4  | Control |     |    | 12.71 |             |                          | Neg                |            |            |
| 591.3906 | 9.09  | 3.46E-07  | 2.42E-06 | 4.4  | GM      |     |    | 17.09 |             |                          | Neg                |            |            |
| 774.5071 | 9.51  | 5.68E-07  | 3.61E-06 | 7.1  | Control |     |    | 18.6  | PE 39:7     |                          | M-H                |            |            |
| 788.5234 | 9.63  | 8.32E-07  | 4.35E-06 | 4.9  | Control |     |    | 16.27 | PE 40:7     | PE 18:1/22:6             | M-H                | C45H76NO8P | -0.179     |
| 762.5080 | 9.65  | 0.00014   | 0.000225 | 2.4  | Control |     |    | 16.15 | PE 38:6     | PE 16:0/22:6             | M-H                | C43H74NO8P | 0.083      |
| 746.5129 | 9.70  | 0.00096   | 0.001105 | 2.1  | Control |     |    | 10.47 | PE O-38:7   | PE P-18:1/20:5           | M-H                | C43H74NO7P | -0.155     |
| 740.5223 | 9.77  | 5.99E-06  | 2.05E-05 | 3.5  | Control |     |    | 10.06 | PE 36:3     |                          | M-H                | C41H76NO8P | -1.778     |
| 772.5288 | 9.80  | 3.25E-06  | 1.21E-05 | 4.5  | Control |     |    | 13.56 | PE O-40:8   | PE P-18:1/22:6           | M-H                | C45H76NO7P | 0.147      |
| 816.5520 | 9.89  | 0.000255  | 0.000371 | 2.4  | Control |     |    | 14.71 | PE 42:7     | PE 20:1/22:6             | M-H                | C47H80NO8P | -3.526     |
| 790.5395 | 9.91  | 0.004639  | 0.004387 | 1.7  | Control |     |    | 15.83 | PE 40:6     | PE 18:0/22:6             | M-H                | C45H78NO8P | 0.348      |
| 742.5388 | 9.94  | 9.74E-07  | 4.59E-06 | 5.9  | Control |     |    | 11.33 | PE 36:2     | PE 18:1/18:1             | M-H                | C41H78NO8P | -0.603     |
| 712.5280 | 10.02 | 6.96E-07  | 4.06E-06 | 15.2 | Control |     |    | 17.28 | PE O-35:3   | PE P-18:1/17:1           | M-H                |            |            |
| 774.5447 | 10.08 | 0.010838  | 0.009312 | 1.6  | Control |     |    | 17.02 | PE O-40:7   | PE P-18:0/22:6           | M-H                | C45H78NO7P | 0.544      |
| 726.5442 | 10.16 | 8.75E-07  | 4.39E-06 | 7.3  | Control |     |    | 12.07 | PE O-36:3   | PE P-18:0/18:2 18:1/18:1 | M-H                | C41H78NO7P | -0.123     |
| 881.5168 | 10.53 | 0.014036  | 0.011597 | 1.7  | Control |     |    | 22.85 | PI 38:6     |                          | M-H                | C47H9013P  | -1.975     |
| 883.5322 | 10.65 | 0.000332  | 0.000447 | 2.3  | Control |     |    | 17.94 | PI 38:5     |                          | M-H                | C47H81O13P | -2.277     |
| 745.4791 | 12.09 | 0.00014   | 0.000225 | 2.2  | Control |     |    | 18.06 |             |                          | Neg                |            |            |
| 828.5494 | 14.37 | 7.84E-06  | 1.38E-05 | 1.7  | GM      |     |    | 7.64  | PC 40:9     |                          | M+H                | C48H78NO8P | -5.243     |
| 854.5622 | 14.38 | 1.36E-05  | 2.17E-05 | 1.4  | GM      |     |    | 7.28  | PC 42:10    |                          | M+H, M+Na          | C50H80NO8P | -8.452     |
| 778.5391 | 14.60 | 2.13E-05  | 3.18E-05 | 1.6  | Control |     |    | 10.2  | PC 36:6     | PC 16:1/20:5             | M+H                | C44H76NO8P | 1.229      |
| 830.5662 | 14.65 | 0.00145   | 0.001105 | 1.4  | GM      |     |    | 11.5  | PC 40:8     | PC 18:2/22:6             | M+H                | C48H80NO8P | -3.939     |
| 832.5174 | 14.76 | 9.55E-09  | 1.66E-07 | 2.3  | Control |     |    | 5.81  | PC 37:8     |                          | M+FA-H             |            |            |
| 806.4982 | 14.79 | 8.58E-06  | 2.61E-05 | 2.0  | Control |     |    | 13.21 | PC 35:7     |                          | M+FA-H             |            |            |
| 522.3557 | 14.90 | 2.46E-06  | 5.79E-06 | 1.8  | Control |     |    | 8.14  | PC 18:1     |                          | M+H, M+Na          | C26H52NO7P | 0.493      |
| 704.5207 | 14.93 | 3.03E-08  | 2.82E-07 | 2.4  | Control |     |    | 9.74  | PC 30:1     | PC 14:0/16:1             | M+H, M+Na, M+K     | C38H74NO8P | -2.532     |
| 730.5392 | 14.98 | 2.76E-05  | 3.92E-05 | 1.4  | Control |     |    | 4.99  | PC 32:2     | PC 14:0/18:2             | M+H, M+K           | C40H76NO8P | 1.409      |
| 832.5847 | 14.98 | 3.99E-06  | 8.24E-06 | 2.0  | Control |     |    | 11.36 | PC 40:7     | PC 18:1/22:6             | M+H, M+Na          | C48H82NO8P | -0.502     |
| 496.3400 | 14.99 | 0.005373  | 0.003538 | 1.4  | GM      |     |    | 13.32 | PC 16:0     |                          | M+H-H2O, M+H, M+Na | C24H50NO7P | 0.402      |
| 782.5688 | 15.22 | 5.45E-07  | 2.04E-06 | 1.8  | GM      |     |    | 7.38  | PC 36:4     | PC 18:2/18:2             | M+H, M+Na          | C44H80NO8P | -0.823     |
| 834.5311 | 15.34 | 0.000218  | 0.000335 | 1.5  | Control |     |    | 10.59 | PC 37:7     |                          | M+FA-H             | C45H76NO8P | 2.564      |
| 848.6145 | 15.45 | 2.13E-08  | 2.16E-07 | 3.8  | Control |     |    | 6.59  | PC 41:6     |                          | M+H                | C49H86NO8P | -2.233     |
| 784.5838 | 15.46 | 0.00094   | 0.000774 | 1.3  | Control |     |    | 4.19  | PC 36:3     | PC 18:1/18:2             | M+H                | C44H82NO8P | -1.688     |
| 732.5545 | 15.47 | 2.81E-06  | 6.29E-06 | 1.8  | Control |     |    | 9.63  | PC 32:1     | PC 16:0/16:1             | M+H, M+Na          | C40H78NO8P | 0.940      |
| 758.5700 | 15.58 | 0.000977  | 0.000799 | 1.3  | Control |     |    | 5.8   | PC 34:2     | PC 16:1/18:1             | M+H                | C42H80NO8P | 0.716      |
| 706.5381 | 15.61 | 1.56E-08  | 1.74E-07 | 2.7  | Control |     |    | 10.18 | PC 30:0     | PC 14:0/16:0             | M+H, M+Na          | C38H76NO8P | -0.100     |
| 792.5898 | 15.61 | 5.85E-06  | 1.1E-05  | 2.7  | Control |     |    | 9.95  | PC O-38:6   | PC P-18:0/20:5           | M+H                | C46H82NO7P | -0.438     |
| 786.5258 | 15.64 | 9.8E-07   | 4.59E-06 | 2.2  | Control |     |    | 5.61  | PC 33:3     |                          | M+FA-H             | C41H76NO8P | -4.456     |
| 772.5843 | 15.64 | 5.33E-10  | 3.11E-08 | 3.1  | Control |     |    | 4.85  | PC 35:2     |                          | M+H                | C43H82NO8P | -1.035     |
| 818.6055 | 15.76 | 3.57E-08  | 2.87E-07 | 3.8  | Control |     |    | 12.16 | PC O-40:7   | PC P-18:0/22:6           | M+H, M+Na          | C48H84NO7P | -0.379     |
| 746.5676 | 15.77 | 2.14E-06  | 5.26E-06 | 1.9  | Control |     |    | 11.23 | PC 33:1     | PC 16:0/17:1             | M+H                | C41H80NO8P | -2.418     |
| 810.5999 | 15.83 | 4.07E-07  | 1.64E-06 | 2.0  | GM      |     |    | 7.91  | PC 38:4     | PC 16:0/22:4             | M+H                | C46H84NO8P | -1.037     |
| 850.5577 | 15.87 | 0.00069   | 0.000819 | 1.6  | Control |     |    | 10.91 | PC 38:6     | PC 18:1/20:5             | M+FA-H             | C46H80NO8P | -3.250     |
| 792.5899 | 15.87 | 0.001527  | 0.001156 | 1.5  | Control |     |    | 12.16 | PC O-38:6   |                          | M+H                | C46H82NO7P | -0.292     |
| 786.6008 | 15.93 | 5.31E-08  | 3.87E-07 | 2.3  | Control |     |    | 6.1   | PC 36:2     | PC 18:1/18:1             | M+H                | C44H84NO8P | 0.106      |
| 782.5670 | 16.05 | 0.00103   | 0.000834 | 1.4  | Control |     |    | 7.98  | PC 36:4     |                          | M+H                | C44H80NO8P | -3.069     |
| 850.5603 | 16.12 | 8.8E-05   | 0.000154 | 1.4  | Control |     |    | 8.18  | PC 38:6     |                          | M+FA-H             | C46H80NO8P | -0.017     |
| 788.5489 | 16.40 | 2.15E-05  | 5.32E-05 | 1.6  | Control |     |    | 3.76  | PC 33:2     |                          | M+FA-H             | C41H78NO8P | 5.594      |
| 718.5735 | 16.43 | 1.57E-06  | 4.29E-06 | 2.4  | Control |     |    | 14.54 | PC O-32:1   |                          | M+H                |            |            |
| 774.5999 | 16.47 | 1.37E-07  | 7.99E-07 | 2.4  | Control |     |    | 8.3   | PC 35:1     |                          | M+H                |            |            |
| 804.5644 | 16.70 | 2.13E-05  | 5.32E-05 | 1.6  | Control |     |    | 8.25  | PC 34:1     | PC 16:0/18:1             | M+FA-H             |            |            |
| 814.6316 | 16.71 | 1.81E-08  | 1.92E-07 | 2.5  | Control |     |    | 6.32  | PC 38:2     | PC 18:1/20:1             | M+H                | C46H88NO8P | -0.511     |
| 864.5826 | 16.86 | 6.92E-05  | 0.00013  | 1.4  | Control |     |    | 9.01  | PC 39:6     |                          | M+FA-H             | C47H82NO8P | 8.015      |
| 788.6165 | 16.87 | 0.006446  | 0.004151 | 1.3  | Control |     |    | 9.31  | PC 36:1     | PC 16:0/20:1 18:0/18:1   | M+H                | C44H86NO8P | 0.128      |
| 772.6211 | 16.99 | 3.93E-10  | 3.11E-08 | 5.9  | Control |     |    | 8.69  | PC O-36:2   | PC P-18:0/18:1           | M+H                | C44H86NO7P | -0.450     |
| 856.6055 | 17.22 | 8.39E-07  | 4.35E-06 | 1.5  | Control |     |    | 5.04  | PC 38:3     | PC 18:1/20:2             | M+FA-H             | C46H86NO8P | -2.194     |
| 746.6058 | 17.23 | 0.0001    | 0.000114 | 2.0  | Control |     |    | 17.26 | PC O-34:1   | PC O-16:0/18:1           | M+H                | C42H84NO7P | 0.009      |
| 872.5632 | 17.24 | 7.57E-07  | 4.29E-06 | 1.5  | Control |     |    | 4.85  |             |                          | Neg                |            |            |
| 804.5763 | 17.25 | 1.06E-05  | 3.01E-05 | 1.5  | Control |     |    | 7.49  | PC 34:1     |                          | M+FA-H             | C42H82NO8P | 0.367      |
| 762.5401 | 17.73 | 3.42E-08  | 4.34E-07 | 2.4  | Control |     |    | 7.39  | PS 34:0     |                          | M-H                |            |            |

Supplementary Table S7. SFC-QTOF analysis of intestine tissue at the final time point. Simple ID was designated by SFC-QTOF, triple quad ID was determined by LC-MS/MS. Green and red represent high and low peak areas, respectively. Red triple quad IDs mean multiple acyl isomers were detected.

| m/z      | RT    | Anova (p) | q Value  | Fold | Highest | Co. | GM | CV%   | Simple ID   | Triple Quad ID         | Adducts           | Formula     | M.E. (ppm) |
|----------|-------|-----------|----------|------|---------|-----|----|-------|-------------|------------------------|-------------------|-------------|------------|
| 554.4796 | 4.94  | 0.0048909 | 0.003356 | 1.8  | Control |     |    | 15.26 | Cer 32:1;O2 |                        | M-H, M+Cl, M+FA-H | C32H63NO3   | 1.082      |
| 765.4713 | 7.73  | 7.354E-06 | 4.2E-05  | 6.7  | Control |     |    | 21.53 | PG 36:6     | PG 14:0/22:6           | M-H               | C42H71O10P  | 0.116      |
| 791.4879 | 7.76  | 0.0154217 | 0.007217 | 1.7  | Control |     |    | 19.16 | PG 38:7     | PG 18:2/20:5           | M-H               | C44H73O10P  | 1.266      |
| 767.4879 | 7.84  | 0.0085835 | 0.004674 | 1.9  | Control |     |    | 21.84 | PG 36:5     | PG 16:0/20:5           | M-H               | C42H73O10P  | 1.402      |
| 793.5035 | 7.93  | 0.0047672 | 0.00334  | 2.0  | Control |     |    | 25.46 | PG 38:6     | PG 18:1/20:5           | M-H               | C44H75O10P  | 1.229      |
| 819.5189 | 7.93  | 5.35E-05  | 0.000178 | 3.4  | Control |     |    | 27.15 | PG 40:7     | PG 18:1/22:6           | M-H               | C46H77O10P  | 0.945      |
| 771.5183 | 7.98  | 0.0020642 | 0.002    | 2.7  | Control |     |    | 34.1  | PG 36:3     |                        | M-H               | C42H77O10P  | 0.192      |
| 795.5168 | 8.01  | 0.0345489 | 0.014002 | 1.6  | Control |     |    | 26.54 | PG 38:5     |                        | M-H               | C44H77O10P  | -1.749     |
| 821.5340 | 8.01  | 0.0009197 | 0.001262 | 2.5  | Control |     |    | 22.91 | PG 40:6     | PG 18:0/22:6           | M-H               | C46H79O10P  | 0.226      |
| 773.5328 | 8.08  | 1.98E-07  | 4.39E-06 | 16.3 | Control |     |    | 37.54 | PG 36:2     | PG 16:0/20:2           | M-H               | C42H79O10P  | -1.286     |
| 747.5191 | 8.08  | 0.000516  | 0.000881 | 3.1  | Control |     |    | 33.06 | PG 34:1     | PG 16:0/18:1           | M-H               | C40H77O10P  | 1.238      |
| 734.4759 | 8.90  | 4.093E-07 | 6.41E-06 | 13.5 | Control |     |    | 18.79 | PE 36:6     | PE 16:1/20:5           | M-H               | C41H70NO8P  | -0.986     |
| 760.4929 | 8.91  | 0.0107035 | 0.007784 | 1.7  | Control |     |    | 16.17 | PE 38:7     | PE 18:2/20:5           | M-H               | C43H72NO8P  | 0.772      |
| 784.4932 | 8.92  | 0.0068106 | 0.004146 | 2.3  | GM      |     |    | 12.86 | PE 40:9     | PE 18:3/22:6           | M-H               | C45H72NO8P  | 1.140      |
| 792.5531 | 9.02  | 0.0001567 | 0.000805 | 2.2  | Control |     |    | 21.56 | PE 40:6     | PE 18:1/22:5           | M+H, M+K          | C45H78NO8P  | -0.837     |
| 736.4928 | 9.03  | 0.0013333 | 0.001524 | 2.2  | Control |     |    | 11.65 | PE 36:5     | PE 16:0/20:5           | M-H               | C41H72NO8P  | 0.657      |
| 738.5082 | 9.11  | 0.006645  | 0.004096 | 2.1  | GM      |     |    | 11.6  | PE 36:4     | PE 16:0/20:4           | M-H               | C41H74NO8P  | 0.334      |
| 788.5240 | 9.12  | 7.176E-05 | 0.000217 | 2.8  | Control |     |    | 12.95 | PE 40:7     | PE 20:2/20:5           | M-H               | C45H76NO8P  | 0.514      |
| 768.5529 | 9.12  | 0.0001488 | 0.000784 | 2.2  | GM      |     |    | 8.6   | PE 38:4     | PE 16:0/22:4           | M+H               | C43H78NO8P  | -1.109     |
| 762.5086 | 9.13  | 0.0020924 | 0.002    | 1.9  | Control |     |    | 10.13 | PE 38:6     | PE 18:1/20:5           | M-H               | C43H74NO8P  | 0.852      |
| 830.4959 | 9.13  | 0.0056096 | 0.00367  | 1.8  | Control |     |    | 10.83 |             |                        | Neg               |             |            |
| 856.5112 | 9.13  | 1.274E-05 | 6.17E-05 | 3.8  | Control |     |    | 13.94 |             |                        | Neg               |             |            |
| 812.5240 | 9.14  | 0.0002195 | 0.000483 | 3.4  | GM      |     |    | 8.76  | PE 42:9     | PE 20:3/22:6           | M-H               | C47H76NO8P  | 0.526      |
| 746.5133 | 9.18  | 0.00069   | 0.00105  | 3.0  | Control |     |    | 16.3  | PE O-38:7   | PE P-18:1/20:5         | M-H               | C43H74NO7P  | 0.446      |
| 740.5233 | 9.23  | 0.0001406 | 0.000367 | 3.2  | Control |     |    | 20.71 | PE 36:3     | PE 18:1/18:2           | M-H               | C41H76NO8P  | -0.416     |
| 776.5255 | 9.25  | 0.0001609 | 0.000393 | 2.6  | Control |     |    | 11.06 | PE 39:6     | PE 17:0/22:6           | M-H               | C44H76NO8P  | 2.501      |
| 764.5228 | 9.26  | 0.0062449 | 0.00395  | 1.7  | Control |     |    | 10.96 | PE 38:5     | PE 16:0/22:5           | M-H               | C43H76NO8P  | -0.957     |
| 772.5293 | 9.28  | 0.000685  | 0.00105  | 2.6  | Control |     |    | 14.55 | PE O-40:8   | PE P-18:1/22:6         | M-H               | C45H76NO7P  | 0.862      |
| 742.5385 | 9.38  | 4.37E-06  | 3.32E-05 | 6.9  | Control |     |    | 21.64 | PE 36:2     | PE 18:1/18:1           | M-H               | C41H78NO8P  | -0.968     |
| 794.5684 | 9.61  | 0.0011838 | 0.001458 | 2.6  | GM      |     |    | 14.24 | PE 40:4     | PE 18:0/22:4           | M-H               | C45H82NO8P  | -2.712     |
| 818.5711 | 9.63  | 0.0001114 | 0.000306 | 3.5  | GM      |     |    | 16.6  | PE 42:6     | PE 20:1/22:5           | M-H               | C47H82NO8P  | 0.744      |
| 820.5857 | 9.75  | 6.716E-05 | 0.000208 | 4.0  | GM      |     |    | 19.25 | PE 42:5     | PE 20:1/22:4           | M-H               | C47H84NO8P  | -0.637     |
| 802.5381 | 13.65 | 0.008147  | 0.013628 | 2.5  | GM      |     |    | 35.81 | PC 38:8     | PC 18:3/20:5           | M+H, M+Na         | C46H76NO8P  | -0.031     |
| 878.5686 | 13.70 | 0.0193181 | 0.025286 | 1.8  | GM      |     |    | 25.24 | PC 44:12    | PC 22:6/22:6           | M+H, M+Na         | C52H80NO8P  | -0.901     |
| 828.5536 | 13.76 | 0.0002499 | 0.001118 | 2.9  | GM      |     |    | 29.12 | PC 40:9     | PC 20:4/20:5           | M+H, M+Na         | C48H78NO8P  | -0.175     |
| 752.5220 | 13.77 | 4.205E-06 | 6.92E-05 | 6.4  | Control |     |    | 28.05 | PC 34:5     | PC 14:0/20:5           | M+H, M+Na         | C42H74NO8P  | -0.671     |
| 854.5678 | 13.77 | 0.0019201 | 0.005018 | 1.9  | GM      |     |    | 23.32 | PC 42:10    | PC 20:5/22:5           | M+H, M+Na         | C50H80NO8P  | -1.941     |
| 778.5380 | 13.81 | 0.0056277 | 0.010647 | 2.0  | Control |     |    | 25.84 | PC 36:6     | PC 18:3/18:3           | M+H, M+Na         | C44H76NO8P  | -0.107     |
| 880.5838 | 13.88 | 0.0157712 | 0.021566 | 1.5  | GM      |     |    | 20.1  | PC 44:11    | PC 22:5/22:6           | M+H, M+Na         | C52H82NO8P  | -1.490     |
| 830.5690 | 13.95 | 0.0023    | 0.005688 | 2.0  | GM      |     |    | 25.57 | PC 40:8     | PC 18:3/22:5           | M+H, M+Na         | C48H80NO8P  | -0.504     |
| 766.5371 | 13.96 | 7.228E-05 | 0.000468 | 2.5  | Control |     |    | 18.35 | PC 35:5     |                        | M+H               | C43H76NO8P  | -1.386     |
| 728.5213 | 13.97 | 9.071E-05 | 0.000551 | 4.5  | Control |     |    | 24.67 | PC 32:3     | PC 14:0/18:3           | M+H               | C40H74NO8P  | -1.672     |
| 856.5833 | 14.00 | 1.704E-05 | 0.000167 | 2.4  | GM      |     |    | 12.67 | PC 42:9     | PC 20:4/22:5           | M+H               | C50H82NO8P  | -2.044     |
| 754.5373 | 14.05 | 0.0006889 | 0.002438 | 2.3  | Control |     |    | 16.23 | PC 34:4     | PC 16:1/18:3           | M+H               | C42H76NO8P  | -1.108     |
| 792.5530 | 14.05 | 0.0001801 | 0.000887 | 1.9  | Control |     |    | 14.73 | PC 37:6     | PC 15:0/22:6           | M+H               | C45H78NO8P  | -1.003     |
| 704.5209 | 14.07 | 3.367E-09 | 6E-07    | 12.6 | Control |     |    | 13.24 | PC 30:1     | PC 14:0/16:1           | M+H               | C38H74NO8P  | -2.180     |
| 730.5368 | 14.16 | 3.395E-07 | 1.3E-05  | 7.5  | Control |     |    | 14.97 | PC 32:2     | PC 14:0/18:2           | M+H               | C40H76NO8P  | -1.807     |
| 832.5847 | 14.21 | 0.0055385 | 0.010534 | 1.6  | Control |     |    | 21.92 | PC 40:7     | PC 18:2/22:5           | M+H, M+K          | C48H82NO8P  | -0.511     |
| 854.5657 | 14.21 | 0.0062976 | 0.011508 | 1.5  | Control |     |    | 18.62 | PC 42:10    |                        | M+H               | C50H80NO8P  | -4.345     |
| 806.5701 | 14.27 | 0.0285983 | 0.033704 | 1.3  | Control |     |    | 11.65 | PC 38:6     | PC 18:2/20:4           | M+H, M+Na         | C46H80NO8P  | 0.821      |
| 794.5679 | 14.35 | 3.64E-06  | 6.34E-05 | 2.6  | Control |     |    | 11.25 | PC 37:5     | PC 17:0/20:5           | M+H               | C45H80NO8P  | -1.923     |
| 782.5690 | 14.36 | 0.0061964 | 0.0114   | 1.5  | GM      |     |    | 11.42 | PC 36:4     | PC 18:2/18:2           | M+H               | C44H80NO8P  | -0.539     |
| 858.5983 | 14.36 | 0.0001073 | 0.000623 | 1.8  | GM      |     |    | 16.36 | PC 42:8     | PC 20:2/22:6           | M+H               | C50H84NO8P  | -2.811     |
| 874.5914 | 14.37 | 7.976E-07 | 2.21E-05 | 5.5  | Control |     |    | 22.45 | PC 42:8;O   |                        | M+H, M+Na         |             |            |
| 900.6089 | 14.51 | 1.285E-06 | 2.99E-05 | 9.9  | Control |     |    | 23.03 | PC 44:9;O   |                        | M+H, M+Na         |             |            |
| 522.3552 | 14.52 | 0.0002864 | 0.00125  | 1.9  | Control |     |    | 17.24 | LPC 18:1    |                        | M+H, M+Na         | C26H52NO7P  | -0.402     |
| 820.5784 | 14.52 | 0.0001525 | 0.000795 | 1.7  | Control |     |    | 12.75 | PC 39:6     | PC 17:0/22:6           | M+H               | C47H82NO8P  | -8.202     |
| 732.5533 | 14.53 | 1.85E-08  | 1.87E-06 | 6.8  | Control |     |    | 10.9  | PC 32:1     | PC 14:0/18:1 16:0/16:1 | M+H, M+Na         | C40H78NO8P  | -0.678     |
| 784.5839 | 14.56 | 0.0025862 | 0.006226 | 1.6  | Control |     |    | 16.26 | PC 36:3     | PC 18:1/18:2           | M+H               | C44H82NO8P  | -1.490     |
| 706.5372 | 14.64 | 1.366E-07 | 6.63E-06 | 6.0  | Control |     |    | 8.82  | PC 30:0     | PC 14:0/16:0           | M+H, M+Na         | C38H76NO8P  | -1.355     |
| 758.5698 | 14.64 | 0.006837  | 0.012221 | 1.5  | Control |     |    | 9.81  | PC 34:2     | PC 16:1/18:1           | M+H               | C42H80NO8P  | 0.501      |
| 790.5396 | 14.68 | 0.0033403 | 0.002686 | 3.2  | Control |     |    | 23.73 |             |                        | Neg               |             |            |
| 860.6147 | 14.71 | 0.0006978 | 0.002454 | 1.7  | GM      |     |    | 17.9  | PC 42:7     | PC 20:1/22:6           | M+H, M+Na         | C50H86NO8P  | -2.001     |
| 824.5454 | 14.74 | 0.0175286 | 0.007965 | 1.5  | Control |     |    | 10.11 | PC 36:5     | PC 18:2/18:3           | M+FA-H            | C44H78NO8P  | 0.891      |
| 746.5679 | 14.76 | 4.296E-08 | 2.87E-06 | 3.4  | Control |     |    | 6.42  | PC 33:1     |                        | M+H               | C41H80NO8P  | -2.106     |
| 792.5890 | 14.77 | 1.755E-05 | 0.000167 | 2.5  | Control |     |    | 8.08  | PC O-38:6   | PC P-18:0/20:5         | M+H               | C46H82NO7P  | -1.463     |
| 822.5993 | 14.77 | 1.313E-05 | 0.000142 | 2.1  | Control |     |    | 16.22 | PC 39:5     |                        | M+H               | C47H84NO8P  | -1.778     |
| 766.5723 | 14.85 | 0.0001198 | 0.000668 | 2.1  | Control |     |    | 10.91 | PC O-36:5   |                        | M+H               | C44H80NO7P  | -2.938     |
| 810.5972 | 14.85 | 0.0245286 | 0.030172 | 1.3  | GM      |     |    | 14.06 | PC 38:4     | PC 18:1/20:3           | M+H               | C46H84NO8P  | -4.339     |
| 818.6047 | 14.90 | 3.77E-06  | 6.4E-05  | 3.1  | Control |     |    | 4.51  | PC O-40:7   | PC P-18:0/22:6         | M+H, M+Na         | C48H84NO7P  | -1.308     |
| 786.6003 | 14.93 | 1.49E-07  | 6.63E-06 | 3.6  | Control |     |    | 15.57 | PC 36:2     | PC 18:1/18:1           | M+H               | C44H84NO8P  | -0.545     |
| 862.6301 | 14.95 | 0.0001186 | 0.000668 | 1.9  | GM      |     |    | 19.17 | PC 42:6     | PC 20:2/22:4           | M+H               | C50H88NO8P  | -2.201     |
| 836.6134 | 15.01 | 0.0011413 | 0.003558 | 1.6  | GM      |     |    | 16.26 | PC 40:5     | PC 18:0/22:5           | M+H               | C48H86NO8P  | -3.527     |
| 760.5850 | 15.03 | 6.189E-06 | 8.7E-05  | 2.0  | Control |     |    | 7.87  | PC 34:1     | PC 16:0/18:1           | M+H, M+K          | C42H82NO8P  | -0.076     |
| 838.6184 | 15.10 | 0.0012465 | 0.003775 | 1.6  | GM      |     |    | 14.07 | PC 40:4     | PC 18:0/22:4           | M+H               | C48H88NO8P  | -16.270    |
| 878.5921 | 15.19 | 0.0042171 | 0.003136 | 1.9  | Control |     |    | 22.39 | PC 40:6     | PC 18:1/22:5           | M+FA-H            | C48H84NO8P  | 0.553      |
| 774.5988 | 15.31 | 3.745E-08 | 2.67E-06 | 3.3  | Control |     |    | 8.16  | PC 35:1     | PC 17:0/18:1           | M+H               | C43H84NO8P  | -2.448     |
| 718.5727 | 15.37 | 6.476E-08 | 3.85E-06 | 11.4 | Control |     |    | 9.68  | PC O-32:1   |                        | M+H               | C40H80NO7P  | -2.534     |
| 788.6162 | 15.63 | 0.0031249 | 0.00723  | 1.3  | Control |     |    | 9.27  | PC 30:1     | PC 18:0/18:1           | M+H               | C44H86NO8P  | -0.193     |
| 675.5431 | 15.87 | 5.163E-05 | 0.000366 | 1.9  | Control |     |    | 12.59 | SM 32:1;O2  |                        | M+H, M+Na         | C37H75N2O6P | -0.610     |
| 806.4964 | 17.95 | 0.0011894 | 0.001458 | 2.2  | Control |     |    | 6.54  | PS 38:6     | PS 16:0/22:6           | M-H               |             |            |

Supplementary Table S8. SFC-QTOF analysis of intestine tissue at the intermediate time point. Simple ID was designated by SFC-QTOF, triple quad ID was determined by LC-MS/MS. Green and red represent high and low peak areas, respectively. Red triple quad IDs mean multiple acyl isomers were detected.

| m/z       | RT    | Anova (p) | q Value  | Fold | Highest | Co. | GM | CV%   | Simple ID   | Triple Quad ID           | Adducts           | Formula      | M.E. (ppm) |
|-----------|-------|-----------|----------|------|---------|-----|----|-------|-------------|--------------------------|-------------------|--------------|------------|
| 554.4788  | 5.21  | 0.006341  | 0.006756 | 1.5  | Control |     |    | 9.63  | Cer 32:1;O2 |                          | M-H, M+Cl, M+FA-H | C32H63NO3    | -0.388     |
| 690.6034  | 5.67  | 0.000358  | 0.000583 | 1.9  | GM      |     |    | 7     | Cer 42:3;O2 |                          | M-H, M+Cl, M+FA-H |              |            |
| 784.4920  | 9.18  | 8.98E-05  | 0.000192 | 1.8  | GM      |     |    | 12.31 | PE 40:9     | PE 18:3/22:6             | M-H               | C45H72NO8P   | -0.300     |
| 810.5063  | 9.22  | 1.36E-07  | 9.49E-07 | 2.4  | GM      |     |    | 8.68  | PE 42:10    | PE 20:4/22:6             | M-H               | C47H74NO8P   | -2.022     |
| 786.5075  | 9.28  | 0.000808  | 0.001158 | 1.3  | GM      |     |    | 2.5   | PE 40:8     | PE 18:2/22:6             | M-H               | C45H74NO8P   | -0.515     |
| 836.5224  | 9.28  | 9.14E-08  | 6.72E-07 | 1.9  | GM      |     |    | 6.86  | PE 44:11    | PE 22:5/22:6             | M-H               | C49H76NO8P   | -1.412     |
| 774.5070  | 9.32  | 2.83E-09  | 4.51E-08 | 3.4  | Control |     |    | 8.76  | PE 39:7     | PE 17:1/22:6             | M-H               | C44H74NO8P   | -1.186     |
| 736.4921  | 9.34  | 0.000127  | 0.00025  | 1.5  | Control |     |    | 11.2  | PE 36:5     | PE 16:0/20:5             | M-H               | C41H72NO8P   | -0.282     |
| 764.5219  | 9.35  | 0.00063   | 0.000609 | 1.3  | Control |     |    | 5.58  | PE 38:6     | PE 18:2/20:4             | M+H, M+Na, M+K    | C43H74NO8P   | -0.814     |
| 812.5225  | 9.42  | 5.33E-06  | 1.7E-05  | 2.5  | GM      |     |    | 13.64 | PE 42:9     | PE 20:3/22:6             | M-H               | C47H76NO8P   | -1.328     |
| 856.5108  | 9.42  | 2.16E-06  | 8.25E-06 | 2.0  | Control |     |    | 10.74 |             |                          | Neg               |              |            |
| 788.5232  | 9.42  | 3.64E-07  | 1.84E-06 | 1.9  | Control |     |    | 8.78  | PE 40:7     | PE 18:1/22:6             | M-H2O-H, M-H      | C45H76NO8P   | -0.524     |
| 738.5071  | 9.43  | 1.36E-09  | 2.78E-08 | 3.0  | GM      |     |    | 5.98  | PE 36:4     | PE 16:0/20:4             | M-H               | C41H74NO8P   | -1.095     |
| 740.5225  | 9.55  | 7.25E-07  | 3.25E-06 | 1.9  | Control |     |    | 7.16  | PE 36:3     | PE 18:1/18:2             | M-H               | C41H76NO8P   | -1.488     |
| 772.5284  | 9.57  | 0.000214  | 0.000401 | 1.7  | Control |     |    | 13.27 | PE O-40:8   | PE P-18:1/22:6           | M-H               | C45H76NO7P   | -0.405     |
| 748.5261  | 9.59  | 0.000258  | 0.000466 | 2.0  | GM      |     |    | 12.91 | PE O-38:6   | PE P-16:0/22:5 18:1/20:4 | M-H               | C43H76NO7P   | -3.470     |
| 792.5529  | 9.61  | 7.18E-05  | 9.06E-05 | 1.5  | GM      |     |    | 8.06  | PE 40:6     | PE 18:0/22:6             | M+H, M+Na         | C45H78NO8P   | -1.098     |
| 816.5543  | 9.67  | 0.002688  | 0.003131 | 1.4  | Control |     |    | 8.77  | PE 42:7     | PE 42:7                  | M-H               | C47H80NO8P   | -0.701     |
| 766.5386  | 9.70  | 4.43E-11  | 6.34E-09 | 3.3  | GM      |     |    | 6.48  | PE 38:4     | PE 18:1/20:3             | M-H               | C43H78NO8P   | -0.766     |
| 768.5446  | 9.70  | 7.78E-10  | 2.16E-08 | 2.8  | GM      |     |    | 7.35  | PE 38:3     | PE 18:2/20:1             | M-H               | C43H80NO8P   | -13.369    |
| 742.5372  | 9.72  | 4.45E-08  | 3.99E-07 | 2.8  | Control |     |    | 12.15 | PE 36:2     | PE 18:1/18:1             | M-H               | C41H78NO8P   | -2.708     |
| 792.5539  | 9.82  | 2.39E-08  | 2.63E-07 | 2.1  | GM      |     |    | 3.4   | PE 40:5     | PE 18:0/22:5             | M-H               | C45H80NO8P   | -1.243     |
| 774.5433  | 9.87  | 7.37E-05  | 0.00017  | 3.0  | GM      |     |    | 16.77 | PE O-40:7   |                          | M-H               | C45H78NO7P   | -1.304     |
| 794.5690  | 9.94  | 1.77E-14  | 5.06E-12 | 6.4  | GM      |     |    | 3.4   | PE 40:4     | PE 18:0/22:4             | M-H               | C45H82NO8P   | -1.943     |
| 810.5619  | 9.95  | 8.3E-10   | 2.16E-08 | 6.6  | Control |     |    | 13.25 | PE 40:4;O   |                          | M-H               |              |            |
| 818.5700  | 9.95  | 2.27E-08  | 2.6E-07  | 3.3  | GM      |     |    | 7.89  | PE 42:6     | PE 20:0/22:6             | M-H               | C47H82NO8P   | -0.614     |
| 784.5492  | 9.99  | 9.21E-06  | 2.64E-05 | 3.4  | Control |     |    | 24.22 | PE 38:3;O   |                          | M-H               |              |            |
| 770.5674  | 10.00 | 5.04E-06  | 1.62E-05 | 3.7  | Control |     |    | 20.35 | PE 38:2     | PE 18:1/20:1             | M-H               | C43H82NO8P   | -4.036     |
| 820.5844  | 10.08 | 3.63E-08  | 3.72E-07 | 3.7  | GM      |     |    | 13.28 | PE 42:5     | PE 20:1/22:4             | M-H               | C47H84NO8P   | -2.111     |
| 798.5972  | 10.27 | 3.68E-06  | 1.24E-05 | 8.2  | Control |     |    | 43.24 | PE 40:2     |                          | M-H               | C45H86NO8P   | -5.820     |
| 812.5803  | 10.28 | 0.000393  | 0.000633 | 2.5  | Control |     |    | 26.46 | PE 40:3;O   |                          | M-H               |              |            |
| 881.5178  | 10.33 | 0.001781  | 0.002279 | 2.4  | Control |     |    | 35.4  | PI 38:6     |                          | M-H               | C47H79O13P   | -0.868     |
| 883.5322  | 10.44 | 1.51E-05  | 4.2E-05  | 3.2  | Control |     |    | 22.71 | PI 38:5     |                          | M-H               | C47H81O13P   | -2.232     |
| 887.5619  | 10.66 | 0.000324  | 0.00055  | 2.6  | Control |     |    | 16.97 | PI 38:3     |                          | M-H               | C47H85O13P   | -4.097     |
| 1543.9591 | 11.92 | 0.002422  | 0.002928 | 1.5  | Control |     |    | 9.28  | CL 80:16    |                          | M-2H, M-H         | C89H142O17P2 | -3.775     |
| 898.5913  | 14.13 | 0.000316  | 0.000332 | 3.9  | Control |     |    | 22.53 | PC 44:10;O  |                          | M-H               |              |            |
| 826.5365  | 14.52 | 0.001156  | 0.001009 | 1.8  | GM      |     |    | 16.97 | PC 40:10    | PC 20:5/20:5 18:4/22:6   | M+H               | C48H76NO8P   | -1.979     |
| 832.5121  | 14.56 | 3.79E-09  | 5.43E-08 | 3.1  | Control |     |    | 7.6   | PC 37:8     |                          | M+FA-H            |              |            |
| 806.4986  | 14.59 | 4.99E-07  | 2.34E-06 | 1.7  | Control |     |    | 7.74  | PC 35:7     |                          | M+FA-H            |              |            |
| 542.3241  | 14.62 | 5.52E-05  | 7.23E-05 | 3.2  | GM      |     |    | 11.43 | LPC 20:5    |                          | M+H               | C28H48NO7P   | -0.115     |
| 852.5530  | 14.63 | 8.94E-05  | 0.000109 | 1.7  | GM      |     |    | 12.85 | PC 42:11    | PC 20:5/22:6             | M+H, M+Na         | C50H78NO8P   | -0.875     |
| 802.5372  | 14.75 | 0.000487  | 0.000478 | 2.8  | GM      |     |    | 22.57 | PC 38:8     | PC 18:3/20:5             | M+H               | C46H76NO8P   | -1.162     |
| 828.5526  | 14.88 | 0.000362  | 0.000365 | 2.3  | GM      |     |    | 15.38 | PC 40:9     | PC 20:4/20:5             | M+H, M+Na         | C48H78NO8P   | -1.472     |
| 854.5680  | 14.89 | 1.56E-07  | 4.95E-07 | 3.2  | GM      |     |    | 10.2  | PC 42:10    | PC 20:5/22:5             | M+H               | C50H80NO8P   | -1.681     |
| 752.5231  | 14.99 | 5.73E-06  | 1.07E-05 | 2.3  | Control |     |    | 8.41  | PC 34:5     | PC 14:0/20:5             | M+H               | C42H74NO8P   | 0.788      |
| 880.5832  | 15.00 | 0.000294  | 0.000315 | 1.8  | GM      |     |    | 11.58 | PC 44:11    | PC 22:5/22:6             | M+H, M+Na         |              |            |
| 860.5456  | 15.04 | 0.000249  | 0.000451 | 1.4  | Control |     |    | 9.72  | PC 39:8     |                          | M+FA-H            |              |            |
| 778.5376  | 15.11 | 0.000985  | 0.000889 | 1.6  | Control |     |    | 9.4   | PC 36:6     | PC 16:1/20:5             | M+H, M+Na         | C44H76NO8P   | -0.686     |

|          |       |          |          |      |         |  |  |       |            |                        |           |             |         |
|----------|-------|----------|----------|------|---------|--|--|-------|------------|------------------------|-----------|-------------|---------|
| 830.5677 | 15.16 | 0.007428 | 0.00496  | 1.5  | GM      |  |  | 6.99  | PC 40:8    | PC 18:3/22:5           | M+H       | C48H80NO8P  | -2.115  |
| 856.5830 | 15.18 | 6.73E-06 | 1.24E-05 | 2.7  | GM      |  |  | 8.46  | PC 42:9    | PC 20:4/22:5           | M+H       | C50H82NO8P  | -2.442  |
| 894.5965 | 15.23 | 4.86E-07 | 1.28E-06 | 2.6  | Control |  |  | 7.45  | PC 45:11   |                        | M+H       |             |         |
| 882.5962 | 15.25 | 1.55E-07 | 4.95E-07 | 3.8  | GM      |  |  | 9.82  | PC 44:10   |                        | M+H       | C52H84NO8P  | -5.139  |
| 818.5649 | 15.30 | 6.7E-07  | 1.55E-06 | 2.0  | Control |  |  | 6.23  | PC 39:7    |                        | M+H       | C47H80NO8P  | -5.557  |
| 792.5527 | 15.37 | 3.03E-05 | 4.45E-05 | 1.7  | Control |  |  | 6.65  | PC 37:6    | PC 15:0/22:6           | M+H       | C45H78NO8P  | -1.408  |
| 780.5545 | 15.48 | 0.017328 | 0.010398 | 1.2  | GM      |  |  | 8.1   | PC 36:5    | PC 18:2/18:3           | M+H       | C44H78NO8P  | 0.956   |
| 832.5846 | 15.52 | 0.000335 | 0.000343 | 1.8  | Control |  |  | 12.67 | PC 40:7    | PC 18:2/22:5           | M+H, M+Na | C48H82NO8P  | -1.909  |
| 730.5381 | 15.56 | 7.38E-09 | 5.88E-08 | 2.9  | Control |  |  | 8.82  | PC 32:2    | PC 14:0/18:2           | M+H       | C40H76NO8P  | -0.055  |
| 874.5922 | 15.62 | 9.52E-08 | 3.32E-07 | 5.3  | Control |  |  | 9.65  | PC 42:8;O  |                        | M+H       |             |         |
| 850.5596 | 15.64 | 0.000481 | 0.000742 | 1.3  | Control |  |  | 7.53  | PC 38:6    | PC 18:2/20:4           | M+FA-H    | C46H80NO8P  | -0.960  |
| 918.5468 | 15.64 | 8.75E-05 | 0.000188 | 1.4  | Control |  |  | 8.28  |            |                        | Neg       |             |         |
| 766.5374 | 15.80 | 2.03E-09 | 3.64E-08 | 2.8  | GM      |  |  | 5.68  |            |                        | Neg       |             |         |
| 782.5684 | 15.80 | 4.74E-09 | 5.31E-08 | 2.7  | GM      |  |  | 5.38  | PC 36:4    | PC 18:2/18:2           | M+H       | C44H80NO8P  | -1.305  |
| 900.6089 | 15.81 | 7.82E-08 | 2.88E-07 | 9.9  | Control |  |  | 11.82 | PC 44:9;O  |                        | M+H       |             |         |
| 820.5826 | 15.99 | 3.09E-05 | 4.47E-05 | 1.6  | Control |  |  | 7.86  | PC 39:6    |                        | M+H       | C47H82NO8P  | -3.005  |
| 896.5704 | 16.05 | 2.33E-10 | 9.54E-09 | 2.3  | Control |  |  | 4.29  |            |                        | Neg       |             |         |
| 848.6074 | 16.06 | 5.54E-07 | 1.35E-06 | 2.1  | Control |  |  | 7.38  | PC 41:6    |                        | M+H       | C49H86NO8P  | -10.627 |
| 784.5830 | 16.10 | 1.85E-05 | 2.94E-05 | 1.6  | Control |  |  | 7.44  | PC 36:3    | PC 16:0/20:3           | M+H       | C44H82NO8P  | -2.695  |
| 808.5834 | 16.10 | 0.000331 | 0.000342 | 1.4  | GM      |  |  | 6.51  | PC 38:5    | PC 16:0/22:5           | M+H       | C46H82NO8P  | -2.034  |
| 732.5527 | 16.14 | 7E-08    | 2.67E-07 | 2.2  | Control |  |  | 9.57  | PC 32:1    | PC 16:0/16:1 14:0/18:1 | M+H, M+Na | C40H78NO8P  | -1.487  |
| 758.5686 | 16.22 | 1.59E-05 | 2.61E-05 | 1.5  | Control |  |  | 8.38  | PC 34:2    | PC 16:0/18:2           | M+H, M+Na | C42H80NO8P  | -0.380  |
| 524.3711 | 16.27 | 0.000135 | 0.000153 | 2.0  | GM      |  |  | 14.32 | LPC 18:0   |                        | M+H, M+Na | C26H54NO7P  | -0.018  |
| 706.5365 | 16.30 | 9.37E-09 | 6.71E-08 | 2.9  | Control |  |  | 7.91  | PC 30:0    |                        | M+H       | C38H76NO8P  | -2.248  |
| 772.5826 | 16.30 | 8.92E-10 | 1.53E-08 | 2.9  | Control |  |  | 1.57  | PC 35:2    |                        | M+H       | C43H82NO8P  | -3.183  |
| 836.6093 | 16.32 | 9.68E-06 | 1.69E-05 | 1.9  | GM      |  |  | 10.35 | PC 40:5    | PC 18:0/22:5           | M+H       | C48H86NO8P  | -8.425  |
| 852.6084 | 16.34 | 1.67E-08 | 1.03E-07 | 9.2  | Control |  |  | 21.97 | PC 40:5;O  |                        | M+H       |             |         |
| 862.5807 | 16.39 | 0.006446 | 0.006817 | 1.3  | Control |  |  | 5.12  |            | PS 20:0/22:6           | Neg       |             |         |
| 818.6043 | 16.40 | 4.73E-06 | 9.2E-06  | 2.4  | Control |  |  | 8.84  | PC O-40:7  | PC P-18:0/22:6         | M+H, M+Na | C48H84NO7P  | -1.907  |
| 746.5673 | 16.46 | 3.35E-07 | 9.92E-07 | 1.9  | Control |  |  | 6.85  | PC 33:1    |                        | M+H       | C41H80NO8P  | -2.877  |
| 810.5995 | 16.50 | 1.32E-10 | 4.5E-09  | 3.3  | GM      |  |  | 6.28  | PC 38:4    | PC 18:2/20:2           | M+H       | C46H84NO8P  | -1.549  |
| 898.5853 | 16.58 | 1.19E-10 | 6.95E-09 | 3.2  | Control |  |  | 5.98  |            |                        | Neg       |             |         |
| 786.5995 | 16.62 | 2.66E-09 | 3.29E-08 | 2.5  | Control |  |  | 7.08  | PC 36:2    | PC 18:1/18:1           | M+H       | C44H84NO8P  | -1.532  |
| 788.6046 | 16.62 | 5.06E-09 | 5.31E-08 | 2.6  | Control |  |  | 7.27  | PC 36:1    | PC 18:0/18:1           | M+H       | C44H86NO8P  | -14.943 |
| 872.5624 | 16.76 | 0.000694 | 0.001015 | 1.3  | Control |  |  | 8.19  |            |                        | Neg       |             |         |
| 854.6236 | 16.90 | 1.01E-09 | 1.53E-08 | 10.3 | Control |  |  | 14.2  | PC 40:4;O  |                        | M+H       |             |         |
| 862.6289 | 17.07 | 4.9E-06  | 9.4E-06  | 2.6  | GM      |  |  | 13.2  | PC 42:6    | PC 20:0/22:6           | M+H       | C50H88NO8P  | -3.606  |
| 838.6243 | 17.09 | 1.39E-07 | 4.74E-07 | 2.4  | GM      |  |  | 8.55  | PC 40:4    | PC 20:0/20:4           | M+H       | C48H88NO8P  | -9.256  |
| 734.5683 | 17.11 | 0.001749 | 0.001428 | 1.3  | GM      |  |  | 8.87  | PC 32:0    | PC 16:0/16:0           | M+H       | C40H80NO8P  | -1.577  |
| 675.5429 | 17.45 | 0.00028  | 0.000305 | 1.6  | Control |  |  | 12.14 | SM 32:1;O2 |                        | M+H       | C37H75N2O6P | -0.997  |
| 814.6302 | 17.48 | 1.43E-05 | 2.4E-05  | 2.0  | Control |  |  | 14.53 | PC 38:2    | PC 18:1/20:1           | M+H       | C46H88NO8P  | -2.248  |
| 842.6616 | 18.43 | 4.27E-07 | 1.21E-06 | 3.2  | Control |  |  | 14.51 | PC 40:2    | PC 18:1/22:1           | M+H       | C48H92NO8P  | -2.045  |
| 811.6665 | 20.22 | 8.76E-05 | 0.000108 | 1.9  | GM      |  |  | 13.98 | SM 42:3;O2 |                        | M+H       | C47H91N2O6P | -2.752  |

Supplementary Table S9. SFC-QTOF analysis of liver tissue at the final time point. Simple ID was designated by SFC-QTOF, triple quad ID was determined by LC-MS/MS. Green and red represent high and low peak areas, respectively. Red triple quad IDs mean multiple acyl isomers were detected.

| m/z      | RT    | Anova (p) | q Value  | Fold | Highest | Co. | GM | CV%   | Simple ID      | Triple Quad ID | Adducts           | Formula    | M.E. (ppm) |
|----------|-------|-----------|----------|------|---------|-----|----|-------|----------------|----------------|-------------------|------------|------------|
| 554.4792 | 4.97  | 0.002949  | 0.002091 | 1.9  | Control |     |    | 14.63 | Cer 32:1;O2    |                | M+Cl, M+FA-H      | C32H63NO3  | 0.326      |
| 604.4947 | 5.02  | 0.003721  | 0.002526 | 3.3  | GM      |     |    | 46.46 | Cer 36:4;O2    |                | M-H, M+Cl, M+FA-H |            |            |
| 608.5254 | 5.10  | 0.007658  | 0.004575 | 3.0  | Control |     |    | 34.27 | Cer 36:2;O2    |                | M-H, M+FA-H       | C36H69NO3  | -0.953     |
| 688.5889 | 5.48  | 0.000359  | 0.000412 | 1.5  | GM      |     |    | 10.85 | Cer 42:4;O2    |                | M-H, M+FA-H       |            |            |
| 694.6351 | 5.66  | 0.000217  | 0.000291 | 2.1  | Control |     |    | 19.93 | Cer 42:1;O2    |                | M+FA-H            | C42H83NO3  | -0.639     |
| 708.6157 | 5.73  | 0.002651  | 0.00192  | 2.2  | GM      |     |    | 27.59 | Cer 42:2;O3    |                | M+FA-H            | C42H81NO4  | 1.451      |
| 869.5302 | 7.36  | 0.000134  | 0.000226 | 2.3  | GM      |     |    | 21.77 | PG 44:10       | PG 22:5/22:5   | M-H               | C50H79O10P | -4.195     |
| 854.6731 | 7.64  | 0.001298  | 0.001077 | 1.4  | Control |     |    | 8.57  | HexCer 42:2;O2 |                | M-H, M+Cl, M+FA-H | C48H91NO8  | 0.534      |
| 765.4718 | 7.87  | 1.24E-06  | 8.04E-06 | 14.0 | Control |     |    | 22.77 | PG 36:6        | PG 14:0/22:6   | M-H               | C42H71O10P | 0.790      |
| 791.4876 | 7.90  | 9.32E-05  | 0.000175 | 3.2  | Control |     |    | 22.69 | PG 38:7        | PG 18:2/20:5   | M-H               | C44H73O10P | 0.884      |
| 767.4875 | 7.98  | 0.000125  | 0.000221 | 3.8  | Control |     |    | 32.6  | PG 36:5        | PG 16:0/20:5   | M-H               | C42H73O10P | 0.887      |
| 817.5029 | 7.98  | 0.011522  | 0.006293 | 1.8  | Control |     |    | 24.61 | PG 40:8        | PG 18:2/22:6   | M-H               | C46H75O10P | 0.522      |
| 793.5032 | 8.06  | 0.00041   | 0.000452 | 3.2  | Control |     |    | 32.45 | PG 38:6        | PG 18:1/20:5   | M-H               | C44H75O10P | 0.885      |
| 819.5185 | 8.08  | 3.96E-05  | 8.89E-05 | 5.2  | Control |     |    | 33.5  | PG 40:7        | PG 18:1/22:6   | M-H               | C46H77O10P | 0.457      |
| 745.5028 | 8.10  | 0.000158  | 0.000243 | 5.2  | Control |     |    | 36.42 | PG 34:2        |                | M-H               | C40H75O10P | 0.413      |
| 771.5181 | 8.11  | 0.000112  | 0.000199 | 5.3  | Control |     |    | 41.83 | PG 36:3        | PG 16:0/20:3   | M-H               | C42H77O10P | -0.064     |
| 795.5186 | 8.15  | 0.002111  | 0.00161  | 2.5  | Control |     |    | 32.71 | PG 38:5        | PG 16:0/22:5   | M-H               | C44H77O10P | 0.523      |
| 821.5338 | 8.16  | 0.000418  | 0.000458 | 4.0  | Control |     |    | 27.52 | PG 40:6        | PG 18:0/22:6   | M-H               | C46H79O10P | -0.053     |
| 870.6682 | 8.17  | 0.000962  | 0.000854 | 1.9  | GM      |     |    | 11.83 | HexCer 42:2;O3 |                | M-H, M+FA-H       | C48H91NO9  | 0.697      |
| 747.5188 | 8.23  | 6.6E-06   | 2.57E-05 | 3.8  | Control |     |    | 19.19 | PG 34:1        | PG 16:0/18:1   | M-H               | C40H77O10P | 0.915      |
| 771.5188 | 8.23  | 3.99E-07  | 3.56E-06 | 4.3  | GM      |     |    | 20.85 | PG 36:3        |                | M-H               | C42H77O10P | 0.841      |
| 821.5344 | 8.25  | 0.01234   | 0.00657  | 2.6  | Control |     |    | 43.86 | PG 40:6        |                | M-H               | C46H79O10P | 0.666      |
| 773.5337 | 8.31  | 0.031962  | 0.014652 | 1.4  | Control |     |    | 20.9  | PG 36:2        | PG 16:0/20:2   | M-H               | C42H79O10P | -0.159     |
| 555.2733 | 8.41  | 0.011571  | 0.006304 | 2.9  | Control |     |    | 41.32 | LPG 22:6       |                | M-H               | C28H45O9P  | 0.799      |
| 509.2881 | 8.54  | 0.001329  | 0.001099 | 9.7  | Control |     |    | 58.87 | LPG 18:1       |                | M-H               | C24H47O9P  | -0.783     |
| 591.3907 | 8.93  | 0.000267  | 0.000333 | 3.4  | GM      |     |    | 18.35 |                |                | Neg               |            |            |
| 758.4770 | 8.99  | 0.000334  | 0.000394 | 3.6  | GM      |     |    | 39.41 | PE 38:8        | PE 18:3/20:5   | M-H               | C43H70NO8P | 0.485      |
| 784.4926 | 9.07  | 2.63E-05  | 6.7E-05  | 4.1  | GM      |     |    | 23.06 | PE 40:9        | PE 18:3/22:6   | M-H               | C45H72NO8P | 0.469      |
| 810.5080 | 9.11  | 0.000236  | 0.000308 | 3.1  | GM      |     |    | 25.36 | PE 42:10       | PE 20:4/22:6   | M-H               | C47H74NO8P | 0.032      |
| 786.5083 | 9.16  | 0.002166  | 0.001627 | 1.7  | GM      |     |    | 11.67 | PE 40:8        | PE 18:3/22:5   | M-H               | C45H74NO8P | 0.531      |
| 774.5081 | 9.18  | 1.31E-07  | 1.73E-06 | 5.6  | Control |     |    | 18.37 | PE 39:7        |                | M-H               | C44H74NO8P | 0.250      |
| 736.4930 | 9.19  | 0.002466  | 0.001817 | 1.4  | Control |     |    | 14.02 | PE 36:5        | PE 16:0/20:5   | M-H               | C41H72NO8P | 1.003      |
| 762.5083 | 9.19  | 0.000947  | 0.000848 | 1.6  | Control |     |    | 14.4  | PE 38:6        | PE 18:2/20:4   | M-H               | C43H74NO8P | 0.501      |
| 738.5082 | 9.27  | 2.4E-07   | 2.52E-06 | 3.9  | GM      |     |    | 17.03 | PE 36:4        | PE 16:0/20:4   | M-H               | C41H74NO8P | 0.379      |
| 764.5209 | 9.27  | 0.010237  | 0.005711 | 1.4  | GM      |     |    | 11.97 | PE 38:5        | PE 18:1/20:4   | M-H               | C43H76NO8P | -3.561     |
| 788.5238 | 9.28  | 0.001059  | 0.000924 | 1.6  | Control |     |    | 12.09 | PE 40:7        | PE 18:2/22:5   | M-H               | C45H76NO8P | 0.333      |
| 856.5110 | 9.28  | 0.000266  | 0.000333 | 1.9  | Control |     |    | 12.9  |                |                | Neg               |            |            |
| 812.5238 | 9.29  | 5.78E-07  | 4.61E-06 | 6.2  | GM      |     |    | 15.22 | PE 42:9        | PE 20:3/22:6   | M-H               | C47H76NO8P | 0.237      |
| 740.5232 | 9.38  | 5.46E-06  | 2.24E-05 | 3.2  | Control |     |    | 15.44 | PE 36:3        | PE 18:1/18:2   | M-H               | C41H76NO8P | -0.535     |
| 814.5394 | 9.39  | 0.000594  | 0.000588 | 1.9  | GM      |     |    | 10.64 | PE 42:8        | PE 20:2/22:6   | M-H               | C47H78NO8P | 0.185      |
| 764.5240 | 9.42  | 0.058626  | 0.024405 | 1.2  | Control |     |    | 11.92 | PE 38:5        |                | M-H               | C43H76NO8P | 0.601      |
| 772.5294 | 9.42  | 0.004236  | 0.002832 | 1.6  | Control |     |    | 15.08 | PE O-40:8      |                | M-H               | C45H76NO7P | 0.966      |
| 498.2627 | 9.49  | 0.008599  | 0.004989 | 4.0  | Control |     |    | 40.6  | LPE 20:5       |                | M-H               | C25H42NO7P | 0.199      |
| 792.5552 | 9.51  | 0.028064  | 0.085195 | 1.3  | GM      |     |    | 14.34 | PE 40:6        | PE 18:1/22:5   | M+H, M+Na         | C45H78NO8P | 1.845      |
| 766.5390 | 9.52  | 3.08E-06  | 1.46E-05 | 2.5  | GM      |     |    | 15.79 | PE 38:4        | PE 18:1/20:3   | M-H               | C43H78NO8P | -0.350     |
| 792.5509 | 9.52  | 1.81E-05  | 5.21E-05 | 2.1  | GM      |     |    | 7.34  | PE 40:5        | PE 18:0/22:5   | M-H               | C45H80NO8P | -5.035     |
| 816.5553 | 9.52  | 0.010966  | 0.00605  | 1.4  | GM      |     |    | 12.36 | PE 42:7        | PE 20:1/22:6   | M-H               | C47H80NO8P | 0.494      |
| 742.5386 | 9.53  | 7.99E-08  | 1.21E-06 | 5.3  | Control |     |    | 20.83 | PE 36:2        | PE 18:1/18:1   | M-H               | C41H78NO8P | -0.909     |
| 818.5704 | 9.63  | 0.008096  | 0.004785 | 1.5  | GM      |     |    | 14.85 | PE 42:6        | PE 20:0/22:6   | M-H               | C47H82NO8P | -0.185     |
| 792.5551 | 9.64  | 0.0005    | 0.000525 | 1.4  | GM      |     |    | 11.68 | PE 40:5        |                | M-H               | C45H80NO8P | 0.317      |
| 524.2788 | 9.75  | 0.025177  | 0.011827 | 1.8  | Control |     |    | 26.93 | LPE 22:6       |                | M-H               | C27H44NO7P | 1.040      |
| 794.5702 | 9.76  | 7.29E-09  | 2.76E-07 | 7.4  | GM      |     |    | 17.62 | PE 40:4        | PE 20:1/20:3   | M-H               | C45H82NO8P | -0.410     |
| 818.5711 | 9.78  | 4.53E-08  | 8.59E-07 | 5.6  | GM      |     |    | 14.07 | PE 42:6        |                | M-H               | C47H82NO8P | 0.739      |
| 820.5857 | 9.90  | 4.82E-08  | 8.6E-07  | 8.4  | GM      |     |    | 20.11 | PE 42:5        | PE 20:0/20:5   | M-H               | C47H84NO8P | -0.559     |
| 478.2942 | 9.91  | 0.000184  | 0.000263 | 4.0  | Control |     |    | 22.36 | LPE 18:1       |                | M-H               | C23H46NO7P | 0.564      |
| 881.5192 | 10.27 | 0.000637  | 0.00062  | 2.6  | Control |     |    | 31.27 | PI 38:6        | PI 18:1/20:5   | M-H               | C47H9013P  | 0.766      |
| 883.5344 | 10.38 | 8.07E-05  | 0.000157 | 2.8  | Control |     |    | 21.9  | PI 38:5        | PI 18:1/20:4   | M-H               | C47H81O13P | 0.257      |
| 909.5473 | 10.38 | 0.000456  | 0.004501 | 1.6  | GM      |     |    | 11.39 | PI 40:7        |                | M+H, M+Na         | C49H81O13P | -1.558     |



|          |       |          |          |     |         |  |  |       |            |                        |                    |                   |
|----------|-------|----------|----------|-----|---------|--|--|-------|------------|------------------------|--------------------|-------------------|
| 949.5287 | 10.39 | 0.000177 | 0.002271 | 1.8 | GM      |  |  | 15.93 | PI O-43:12 |                        | M+NH4, M+Na        |                   |
| 885.5505 | 10.47 | 0.012991 | 0.00678  | 1.3 | GM      |  |  | 9.63  | PI 38:4    | PI 18:0/20:4           | M-H                | C47H83O13P 0.695  |
| 911.5644 | 10.55 | 0.003002 | 0.002118 | 1.6 | GM      |  |  | 22.16 | PI 40:5    | PI 18:0/22:5           | M-H                | C49H85O13P -1.209 |
| 913.5772 | 10.65 | 5.21E-05 | 0.000113 | 2.8 | GM      |  |  | 20.91 | PI 40:4    | PI 20:0/20:4 18:0/22:4 | M-H                | C49H87O13P -4.311 |
| 852.5549 | 14.36 | 0.00075  | 0.006436 | 1.9 | GM      |  |  | 19.95 | PC 42:11   | PC 20:5/22:6           | M+H                | C50H78NO8P 1.327  |
| 802.5392 | 14.45 | 5.8E-05  | 0.001071 | 5.0 | GM      |  |  | 35.17 | PC 38:8    | PC 18:3/20:5           | M+H-H2O, M+H, M+Na | C46H76NO8P 1.314  |
| 878.5706 | 14.49 | 0.000741 | 0.00639  | 1.8 | GM      |  |  | 21.44 | PC 44:12   | PC 22:6/22:6           | M+H, M+Na          | C52H80NO8P 1.319  |
| 788.5231 | 14.56 | 0.006133 | 0.003837 | 2.3 | GM      |  |  | 32.39 | PC 37:7    |                        | M-H                | C45H76NO8P -0.607 |
| 828.5550 | 14.58 | 6E-06    | 0.000219 | 5.2 | GM      |  |  | 27.77 | PC 40:9    | PC 20:4/20:5           | M+H, M+Na          | C48H78NO8P 1.418  |
| 854.5696 | 14.61 | 1.71E-06 | 9.76E-05 | 4.4 | GM      |  |  | 23.91 | PC 42:10   | PC 20:5/22:5           | M+H, M+Na          | C50H80NO8P 0.212  |
| 752.5224 | 14.62 | 0.00011  | 0.001598 | 3.0 | Control |  |  | 19.11 | PC 34:5    | PC 14:0/20:5           | M+H, M+Na          | C42H74NO8P -0.075 |
| 804.5556 | 14.67 | 0.001057 | 0.007988 | 2.1 | GM      |  |  | 23.84 | PC 38:7    | PC 18:3/20:4           | M+H, M+Na          | C46H78NO8P 2.296  |
| 880.5853 | 14.68 | 4.17E-06 | 0.000175 | 3.2 | GM      |  |  | 17.27 | PC 44:11   | PC 22:5/22:6           | M+H, M+Na          | C52H82NO8P 0.253  |
| 778.5395 | 14.71 | 0.015843 | 0.05645  | 1.5 | Control |  |  | 16.36 | PC 36:6    | PC 18:3/18:3           | M+H, M+Na          | C44H76NO8P 1.740  |
| 830.5714 | 14.79 | 1.97E-05 | 0.000497 | 2.9 | GM      |  |  | 21.38 | PC 40:8    | PC 18:3/22:5           | M+H                | C48H80NO8P 2.399  |
| 852.5535 | 14.79 | 2.31E-05 | 0.00055  | 5.8 | GM      |  |  | 19.61 | PC 42:11   |                        | M+H                |                   |
| 856.5858 | 14.81 | 3.26E-07 | 3.64E-05 | 5.4 | GM      |  |  | 22.97 | PC 42:9    | PC 20:4/22:5           | M+H, M+Na          | C50H82NO8P 0.889  |
| 882.6001 | 14.92 | 3.93E-06 | 0.000175 | 4.5 | GM      |  |  | 19.68 | PC 44:10   | PC 22:5/22:5           | M+H, M+Na          | C52H84NO8P -0.669 |
| 894.5997 | 14.93 | 1.81E-05 | 0.000485 | 3.8 | Control |  |  | 29.65 | PC 45:11   |                        | M+H, M+Na          |                   |
| 792.5548 | 14.94 | 0.000409 | 0.004114 | 1.6 | Control |  |  | 14.45 | PC 37:6    | PC 15:0/22:6           | M+H                | C45H78NO8P 1.311  |
| 730.5385 | 15.09 | 7.76E-08 | 2.47E-05 | 4.4 | Control |  |  | 18.43 | PC 32:2    | PC 14:0/18:2           | M+H                | C40H76NO8P 0.479  |
| 884.6126 | 15.15 | 8.15E-07 | 6.29E-05 | 6.1 | GM      |  |  | 20.98 | PC 44:9    |                        | M+H                | C52H86NO8P -4.251 |
| 740.5208 | 15.20 | 5.97E-05 | 0.000127 | 2.4 | GM      |  |  | 22.03 |            |                        | Neg                |                   |
| 858.6009 | 15.23 | 1.66E-05 | 0.000459 | 2.8 | GM      |  |  | 22.23 | PC 42:8    | PC 20:2/22:6           | M+H, M+Na          | C50H84NO8P 0.195  |
| 874.5942 | 15.24 | 1.9E-05  | 0.000497 | 4.0 | Control |  |  | 32.71 | PC 42:8;O  |                        | M+H                |                   |
| 794.5690 | 15.25 | 2.2E-07  | 3.21E-05 | 2.7 | Control |  |  | 12.17 | PC 37:5    | PC 17:0/20:5           | M+H                | C45H80NO8P -0.520 |
| 846.6020 | 15.29 | 9.53E-05 | 0.001522 | 2.2 | Control |  |  | 19.91 | PC 41:7    |                        | M+H                | C49H84NO8P 1.478  |
| 782.5708 | 15.30 | 2.02E-06 | 0.000108 | 2.4 | GM      |  |  | 13.94 | PC 36:4    | PC 18:2/18:2           | M+H, M+Na          | C44H80NO8P 1.703  |
| 718.5357 | 15.31 | 1.04E-07 | 2.47E-05 | 1.9 | Control |  |  | 6.13  | PC 31:1    |                        | M+H                | C39H76NO8P -3.386 |
| 756.5548 | 15.33 | 0.000138 | 0.001892 | 1.9 | GM      |  |  | 18.96 | PC 34:3    | PC 16:0/18:3           | M+H                | C42H78NO8P 1.348  |
| 900.6108 | 15.41 | 7.63E-05 | 0.001284 | 4.2 | Control |  |  | 34.97 | PC 44:9;O  |                        | M+H, M+Na          |                   |
| 828.5761 | 15.47 | 0.038269 | 0.017129 | 1.3 | Control |  |  | 14.73 | PC 36:3    | PC 18:1/18:2           | M+FA-H             | C44H82NO8P 0.145  |
| 820.5810 | 15.47 | 0.000211 | 0.002542 | 1.7 | Control |  |  | 10.35 | PC 39:6    |                        | M+H                | C47H82NO8P -4.974 |
| 522.3555 | 15.51 | 0.003098 | 0.017989 | 2.8 | Control |  |  | 39.8  | LPC 18:1   |                        | M+H                | C26H52NO7P 0.160  |
| 732.5534 | 15.53 | 9.91E-08 | 2.47E-05 | 4.0 | Control |  |  | 13.96 | PC 32:1    | PC 14:0/18:1 16:0/16:1 | M+H, M+Na          | C40H78NO8P -0.496 |
| 848.6166 | 15.62 | 2.11E-05 | 0.000518 | 4.5 | Control |  |  | 32.37 | PC 41:6    |                        | M+H, M+Na          | C49H86NO8P 0.219  |
| 758.5709 | 15.63 | 0.020124 | 0.067166 | 1.3 | Control |  |  | 15.76 | PC 34:2    | PC 16:0/18:2           | M+H                | C42H80NO8P 1.929  |
| 860.6180 | 15.66 | 0.000888 | 0.007258 | 1.9 | GM      |  |  | 20.74 | PC 42:7    | PC 20:2/22:5           | M+H, M+Na          | C50H86NO8P 1.849  |
| 792.5897 | 15.72 | 0.000915 | 0.007341 | 1.9 | Control |  |  | 23.51 | PC O-38:6  | PC O-16:0/22:6         | M+H                | C46H82NO7P -0.537 |
| 834.6028 | 15.75 | 0.014491 | 0.053084 | 1.4 | GM      |  |  | 16.99 | PC 40:6    | PC 20:1/20:5           | M+H, M+Na          | C48H84NO8P 2.483  |
| 822.6052 | 15.76 | 0.000949 | 0.007443 | 1.8 | Control |  |  | 18.63 | PC 39:5    |                        | M+H                | C47H84NO8P 5.394  |
| 746.5668 | 15.79 | 1.45E-06 | 8.84E-05 | 2.2 | Control |  |  | 11.05 | PC 33:1    |                        | M+H                | C41H80NO8P -3.581 |
| 810.5996 | 15.80 | 2.39E-05 | 0.00056  | 1.9 | GM      |  |  | 13.57 | PC 38:4    | PC 18:2/20:2           | M+H                | C46H84NO8P -1.340 |
| 716.5550 | 15.81 | 2.99E-09 | 6.31E-06 | 4.1 | Control |  |  | 12.5  | PC O-32:2  |                        | M+H                | C40H78NO7P -5.405 |
| 818.6054 | 15.87 | 0.000241 | 0.002768 | 2.1 | Control |  |  | 13.52 | PC O-40:7  | PC P-18:0/22:6         | M+H                | C48H84NO7P -0.570 |
| 862.6317 | 15.93 | 0.001911 | 0.012439 | 1.9 | GM      |  |  | 22.9  | PC 42:6    | PC 20:0/22:6           | M+H                | C50H88NO8P -0.353 |
| 772.5832 | 15.95 | 8.57E-06 | 0.000292 | 2.1 | Control |  |  | 12.44 | PC 35:2    |                        | M+H                | C43H82NO8P -2.433 |
| 786.6013 | 15.98 | 2.07E-05 | 0.000518 | 2.4 | Control |  |  | 15.98 | PC 36:2    | PC 18:1/18:1           | M+H                | C44H84NO8P 0.721  |
| 836.6172 | 16.05 | 0.004491 | 0.023415 | 1.7 | GM      |  |  | 23.8  | PC 40:5    | PC 18:0/22:5           | M+H                | C48H86NO8P 0.934  |
| 760.5859 | 16.10 | 0.00514  | 0.025927 | 1.5 | Control |  |  | 19.4  | PC 34:1    | PC 16:0/18:1           | M+H, M+Na          | C42H82NO8P 1.140  |
| 800.6189 | 16.31 | 6.84E-05 | 0.001204 | 2.9 | Control |  |  | 25.77 | PC 37:2    |                        | M+H                | C45H86NO8P 3.196  |
| 774.5995 | 16.37 | 7.24E-07 | 6.13E-05 | 3.0 | Control |  |  | 12.61 | PC 35:1    |                        | M+H                | C43H84NO8P -1.530 |
| 862.6317 | 16.40 | 1.34E-05 | 0.0004   | 3.4 | GM      |  |  | 23.46 | PC 42:6    |                        | M+H, M+Na          | C50H88NO8P -0.427 |
| 882.6177 | 16.45 | 1.27E-06 | 8.04E-06 | 4.4 | GM      |  |  | 18.23 | PC 40:4    | PC 20:1/20:3           | M+FA-H             | C48H88NO8P -6.229 |
| 788.6170 | 16.83 | 0.024442 | 0.077332 | 1.4 | Control |  |  | 19.02 | PC 36:1    | PC 18:0/18:1           | M+H                | C44H86NO8P 0.726  |
| 802.6315 | 16.85 | 8.21E-05 | 0.001371 | 4.7 | Control |  |  | 41.07 | PC 37:1    |                        | M+H                | C45H88NO8P -0.684 |
| 772.6194 | 16.96 | 1.28E-07 | 2.55E-05 | 4.5 | Control |  |  | 10.39 | PC O-36:2  |                        | M+H                | C44H86NO7P -2.715 |

Supplementary Table S10. SFC-QTOF analysis of liver tissue at the intermediate time point. Simple ID was designated by SFC-QTOF, triple quad ID was determined by LC-MS/MS. Green and red represent high and low peak areas, respectively. Red triple quad IDs mean multiple acyl isomers were detected.

| m/z       | RT    | Anova (p) | q Value  | Fold | Highest | Co. | GM | CV%   | Simple ID    | Triple Quad ID         | Adducts           | Formula      | M.E. (ppm) |
|-----------|-------|-----------|----------|------|---------|-----|----|-------|--------------|------------------------|-------------------|--------------|------------|
| 779.6540  | 5.09  | 0.000271  | 0.00019  | 2.5  | Control |     |    | 23.13 |              |                        |                   |              |            |
| 664.5887  | 5.61  | 0.00013   | 0.000113 | 2.0  | GM      |     |    | 16.61 | Cer 40:2;O2  |                        | M-H, M+Cl, M+FA-H |              |            |
| 690.6037  | 5.68  | 0.006553  | 0.003449 | 1.3  | GM      |     |    | 10.75 | Cer 42:3;O2  |                        | M-H, M+Cl, M+FA-H |              |            |
| 867.5160  | 7.35  | 3.57E-05  | 3.42E-05 | 2.0  | GM      |     |    | 16.29 | PG 44:11     | PG 22:5/22:6           | M-H               | C50H77O10P   | -2.526     |
| 869.5303  | 7.37  | 3.13E-08  | 1.02E-07 | 5.6  | GM      |     |    | 18.03 | PG 44:10     | PG 22:4/22:6           | M-H               | C50H79O10P   | -4.042     |
| 791.4849  | 8.03  | 0.001329  | 0.000833 | 3.9  | GM      |     |    | 40.96 | PG 38:7      | PG 18:2/20:5           | M-H               | C44H73O10P   | -2.424     |
| 767.4856  | 8.06  | 0.002643  | 0.001542 | 4.1  | GM      |     |    | 50.73 | PG 36:5      |                        | M-H               | C42H73O10P   | -1.583     |
| 817.5006  | 8.06  | 0.002064  | 0.001239 | 3.0  | GM      |     |    | 39.34 | PG 40:8      |                        | M-H               | C46H75O10P   | -2.296     |
| 795.5163  | 8.27  | 0.002988  | 0.001705 | 4.2  | GM      |     |    | 54.08 | PG 38:5      |                        | M-H               | C44H77O10P   | -2.379     |
| 591.3902  | 8.97  | 1.42E-08  | 6.06E-08 | 5.5  | GM      |     |    | 7.83  |              |                        | Neg               |              |            |
| 784.4920  | 9.21  | 1.72E-05  | 1.79E-05 | 1.9  | GM      |     |    | 7.45  | PE 40:9      | PE 18:3/22:6           | M-H               | C45H72NO8P   | -0.407     |
| 810.5063  | 9.26  | 1.23E-06  | 1.87E-06 | 3.1  | GM      |     |    | 7.62  | PE 42:10     | PE 20:4/22:6           | M-H               | C47H74NO8P   | -2.011     |
| 786.5073  | 9.30  | 0.000135  | 0.000115 | 1.5  | GM      |     |    | 4.01  | PE 40:8      | PE 18:2/22:6           | M-H               | C45H74NO8P   | -0.768     |
| 836.5216  | 9.30  | 2.99E-08  | 1.01E-07 | 3.0  | GM      |     |    | 4.99  | PE 44:11     | PE 22:5/22:6           | M-H               | C49H76NO8P   | -2.312     |
| 774.5071  | 9.34  | 2.14E-08  | 7.67E-08 | 6.0  | Control |     |    | 15.79 | PE 39:7      | PE 17:1/22:6           | M-H               | C44H74NO8P   | -1.092     |
| 788.5228  | 9.44  | 3.08E-07  | 6.09E-07 | 2.0  | Control |     |    | 5.95  | PE 40:7      | PE 18:2/22:5           | M-H               | C45H76NO8P   | -0.933     |
| 812.5226  | 9.44  | 7.31E-08  | 2.04E-07 | 3.4  | GM      |     |    | 5.08  | PE 42:9      | PE 20:3/22:6           | M-H               | C47H76NO8P   | -1.233     |
| 856.5103  | 9.44  | 1.62E-07  | 3.53E-07 | 2.0  | Control |     |    | 6.92  | PE 42:10     |                        | M+FA-H            | C47H74NO8P   | -3.867     |
| 764.5193  | 9.45  | 1.46E-06  | 2.19E-06 | 1.8  | GM      |     |    | 4.06  | PE 38:5      | PE 16:0/22:5           | M-H               | C43H76NO8P   | -5.564     |
| 738.5064  | 9.46  | 1.2E-09   | 8.55E-09 | 4.3  | GM      |     |    | 5.02  | PE 36:4      | PE 16:0/20:4           | M-H               | C41H74NO8P   | -2.017     |
| 764.5221  | 9.50  | 0.002151  | 0.001155 | 1.5  | Control |     |    | 15.93 | PE 38:6      | PE 18:2/20:4           | M+H               | C43H74NO8P   | -0.563     |
| 814.5382  | 9.55  | 6.87E-05  | 6.26E-05 | 1.6  | GM      |     |    | 5.65  | PE 42:8      | PE 20:2/22:6           | M-H               | C47H78NO8P   | -1.243     |
| 740.5219  | 9.57  | 1.92E-07  | 3.91E-07 | 2.9  | Control |     |    | 7.72  | PE 36:3      | PE 18:1/18:2           | M-H               | C41H76NO8P   | -2.246     |
| 772.5277  | 9.60  | 2.84E-06  | 3.88E-06 | 2.3  | Control |     |    | 10.06 | PE O-40:8    | PE P-18:1/22:6         | M-H               | C45H76NO7P   | -1.255     |
| 764.5229  | 9.61  | 0.00236   | 0.001397 | 1.3  | GM      |     |    | 2.75  | PE 38:5      |                        | M-H               | C43H76NO8P   | -0.828     |
| 766.5385  | 9.72  | 9.79E-12  | 3.14E-10 | 6.4  | GM      |     |    | 5.19  | PE 38:4      | PE 18:0/20:4           | M-H               | C43H78NO8P   | -1.003     |
| 790.5386  | 9.72  | 0.000258  | 0.000195 | 1.5  | GM      |     |    | 3.71  | PE 40:6      | PE 20:1/20:5           | M-H               | C45H78NO8P   | -0.838     |
| 742.5370  | 9.75  | 3.22E-08  | 1.02E-07 | 3.6  | Control |     |    | 8.89  | PE 36:2      | PE 18:0/18:2           | M-H               | C41H78NO8P   | -3.025     |
| 792.5539  | 9.85  | 3.79E-08  | 1.13E-07 | 3.1  | GM      |     |    | 5.68  | PE 40:5      | PE 18:0/22:5           | M-H               | C45H80NO8P   | -1.262     |
| 768.5539  | 9.86  | 2.12E-07  | 4.26E-07 | 2.1  | Control |     |    | 6.15  | PE 38:3      | PE 18:2/20:1           | M-H               | C43H80NO8P   | -1.326     |
| 794.5691  | 9.99  | 1.39E-12  | 1.36E-10 | 7.2  | GM      |     |    | 6.06  | PE 40:4      | PE 20:1/20:3           | M-H               | C45H82NO8P   | -1.827     |
| 718.5696  | 9.99  | 1.83E-09  | 1.24E-08 | 5.3  | GM      |     |    | 9.05  | PE 42:6      | PE 20:1/22:5           | M-H               | C47H82NO8P   | -1.096     |
| 770.5692  | 10.03 | 3.24E-12  | 1.39E-10 | 6.3  | Control |     |    | 6.16  | PE 38:2      | PE 18:1/20:1           | M-H               | C43H82NO8P   | -1.658     |
| 820.5840  | 10.12 | 2.13E-12  | 1.36E-10 | 7.0  | GM      |     |    | 8.02  | PE 42:5      | PE 20:0/22:5 22:1/20:4 | M-H               | C47H84NO8P   | -2.616     |
| 881.5178  | 10.27 | 7.53E-09  | 3.58E-08 | 3.5  | Control |     |    | 2.52  | PI 38:6      | PI 18:1/20:5           | M-H               | C47H79O13P   | -0.798     |
| 855.5011  | 10.29 | 1.15E-08  | 5.08E-08 | 15.0 | Control |     |    | 24.68 | PI 36:5      |                        | M-H               | C45H77O13P   | -2.088     |
| 798.6001  | 10.32 | 2.03E-11  | 5.21E-10 | 9.8  | Control |     |    | 12.04 | PE 40:2      | PE 18:1/22:1           | M-H               | C45H86NO8P   | -2.118     |
| 883.5332  | 10.35 | 3.88E-09  | 2.13E-08 | 2.9  | Control |     |    | 8.51  | PI 38:5      | PI 18:1/20:4           | M-H               | C47H81O13P   | -1.106     |
| 907.5329  | 10.35 | 1.83E-08  | 7.36E-08 | 2.6  | Control |     |    | 5.35  | PI 40:7      | PI 18:1/22:6           | M-H               | C49H81O13P   | -1.403     |
| 857.5177  | 10.37 | 7.34E-05  | 6.64E-05 | 1.9  | Control |     |    | 16.31 | PI 36:4      | PI 16:0/20:4           | M-H               | C45H79O13P   | -1.046     |
| 859.5324  | 10.48 | 3.98E-10  | 5.06E-09 | 13.0 | Control |     |    | 14.78 | PI 36:3      |                        | M-H               | C45H81O13P   | -2.069     |
| 883.5338  | 10.48 | 1.4E-07   | 3.34E-07 | 6.8  | Control |     |    | 18.26 | PI 38:5      |                        | M-H               | C47H81O13P   | -0.410     |
| 951.5196  | 10.48 | 2.15E-08  | 7.67E-08 | 3.7  | Control |     |    | 14.01 | PI 40:8      |                        | M+FA-H            | C49H79O13P   | -4.849     |
| 885.5495  | 10.57 | 1.04E-06  | 1.63E-06 | 1.6  | GM      |     |    | 5.58  | PI 38:4      | PI 18:0/20:4           | M-H               | C47H83O13P   | -0.363     |
| 953.5369  | 10.57 | 1.01E-05  | 1.14E-05 | 1.5  | GM      |     |    | 7.75  | PI 40:7      |                        | M+FA-H            |              |            |
| 861.5464  | 10.58 | 9.49E-10  | 7.89E-09 | 10.4 | Control |     |    | 13.33 | PI 36:2      |                        | M-H               | C45H83O13P   | -3.986     |
| 911.5626  | 10.64 | 0.000134  | 0.000115 | 1.3  | GM      |     |    | 6.66  | PI 40:5      | PI 18:0/22:5           | M-H               | C49H85O13P   | -3.200     |
| 888.5664  | 10.70 | 1.12E-09  | 8.48E-09 | 4.0  | Control |     |    | 6.05  | Hex2Cer 34:3 |                        | M-H               |              |            |
| 913.5764  | 10.77 | 7.06E-06  | 8.24E-06 | 1.8  | GM      |     |    | 11.74 | PI 40:4      | PI 18:0/22:4           | M-H               | C49H87O13P   | -5.175     |
| 1543.9601 | 11.99 | 0.000918  | 0.000611 | 1.5  | Control |     |    | 12.66 | CL 80:16     |                        | M-H               | C89H142O17P2 | -3.126     |
| 852.5539  | 15.16 | 0.001845  | 0.001012 | 1.7  | GM      |     |    | 19.52 | PC 42:11     | PC 20:5/22:6           | M+H               | C50H78NO8P   | 0.132      |
| 568.3407  | 15.21 | 6.32E-05  | 5E-05    | 2.0  | Control |     |    | 13.54 | LPC 22:6     |                        | M+H               | C30H50NO7P   | 1.569      |
| 802.5379  | 15.30 | 2.98E-06  | 3.38E-06 | 3.7  | GM      |     |    | 19.74 | PC 38:8      | PC 18:3/20:5           | M+H               | C46H76NO8P   | -0.240     |
| 900.5750  | 15.30 | 3.97E-08  | 1.16E-07 | 5.0  | GM      |     |    | 12.28 | PC 42:9      | PC 20:5/22:4           | M+FA-H            | C50H82NO8P   | -1.217     |
| 806.4980  | 15.32 | 1.87E-05  | 1.92E-05 | 1.7  | Control |     |    | 6.52  | PC 35:7      | PC 15:2/20:5           | M+FA-H            |              |            |
| 828.5534  | 15.43 | 4.14E-05  | 3.52E-05 | 2.5  | GM      |     |    | 17.52 | PC 40:9      | PC 20:4/20:5           | M+H, M+Na         | C48H78NO8P   | -0.435     |
| 854.5682  | 15.45 | 1.11E-07  | 2.08E-07 | 5.6  | GM      |     |    | 20.83 | PC 42:10     | PC 20:5/22:5           | M+H, M+Na         | C50H80NO8P   | -1.447     |
| 752.5219  | 15.53 | 2.74E-05  | 2.56E-05 | 2.4  | Control |     |    | 13.1  | PC 34:5      | PC 14:0/20:5           | M+H               | C42H74NO8P   | -0.786     |
| 544.3394  | 15.55 | 7.85E-06  | 7.82E-06 | 3.4  | GM      |     |    | 12.38 | LPC 20:4     |                        | M+H               | C28H50NO7P   | -0.674     |

|          |       |          |          |     |         |  |  |       |            |                |                |            |         |
|----------|-------|----------|----------|-----|---------|--|--|-------|------------|----------------|----------------|------------|---------|
| 824.5442 | 15.56 | 0.001714 | 0.001053 | 1.3 | GM      |  |  | 5.12  | PC 36:5    | PC 16:0/20:5   | M+FA-H         | C44H78NO8P | -0.596  |
| 880.5833 | 15.56 | 1.23E-05 | 1.19E-05 | 2.6 | GM      |  |  | 18.47 | PC 44:11   | PC 22:5/22:6   | M+H, M+Na      | C52H82NO8P | -2.065  |
| 804.5537 | 15.58 | 0.001555 | 0.000867 | 1.8 | GM      |  |  | 17.15 | PC 38:7    | PC 18:2/20:5   | M+H, M+Na      | C46H78NO8P | -0.089  |
| 778.5386 | 15.66 | 5.77E-05 | 4.67E-05 | 2.0 | Control |  |  | 11.98 | PC 36:6    | PC 18:3/18:3   | M+H, M+Na      | C44H76NO8P | 0.572   |
| 830.5688 | 15.71 | 0.005734 | 0.00274  | 1.6 | GM      |  |  | 17.49 | PC 40:8    | PC 18:3/22:5   | M+H, M+Na      | C48H80NO8P | -0.803  |
| 918.5517 | 15.73 | 0.000656 | 0.000448 | 1.3 | Control |  |  | 6.61  |            |                | Neg            |            |         |
| 902.5897 | 15.77 | 0.001153 | 0.000745 | 1.6 | GM      |  |  | 10.26 | PC 42:8    | PC 20:2/22:6   | M+FA-H         | C50H84NO8P | -2.315  |
| 894.5993 | 15.80 | 2.1E-09  | 1.14E-08 | 4.2 | Control |  |  | 11.56 | PC 45:11   |                | M+H            |            |         |
| 882.5985 | 15.82 | 1.75E-08 | 5.2E-08  | 6.1 | GM      |  |  | 19.7  | PC 44:10   | PC 22:5/22:5   | M+H            | C52H84NO8P | -2.555  |
| 818.5673 | 15.87 | 9.44E-06 | 9.33E-06 | 2.2 | Control |  |  | 12.99 | PC 39:7    | PC 17:1/22:6   | M+H            | C47H80NO8P | -2.650  |
| 792.5549 | 15.94 | 1.3E-06  | 1.69E-06 | 2.1 | Control |  |  | 9.93  | PC 37:6    |                | M+H            | C45H78NO8P | 1.408   |
| 776.5552 | 16.01 | 1.03E-10 | 1.5E-09  | 5.0 | Control |  |  | 10.22 | PC O-37:7  | PC P-15:0/22:6 | M+H            | C45H80NO8P | -4.656  |
| 832.5818 | 16.11 | 0.001192 | 0.000685 | 1.6 | Control |  |  | 10.95 | PC 40:7    | PC 18:2/22:5   | M+H, M+Na      | C48H82NO8P | -3.950  |
| 884.6119 | 16.12 | 5.04E-10 | 4.69E-09 | 6.1 | GM      |  |  | 12.19 | PC 44:9    | PC 22:4/22:5   | M+H            | C52H86NO8P | -5.031  |
| 730.5371 | 16.13 | 2.5E-09  | 1.18E-08 | 4.2 | Control |  |  | 11.67 | PC 32:2    | PC 14:0/18:2   | M+H            | C40H76NO8P | -1.464  |
| 522.3556 | 16.15 | 7.31E-07 | 1.06E-06 | 3.7 | Control |  |  | 16.28 | LPC 18:1   |                | M+H, M+Na      | C26H52NO7P | 0.431   |
| 896.5740 | 16.16 | 3.09E-09 | 1.89E-08 | 2.0 | Control |  |  | 3.37  | PC O-43:11 |                | M+FA-H         |            |         |
| 874.5950 | 16.19 | 1.95E-08 | 5.71E-08 | 4.6 | Control |  |  | 12.05 | PC 42:8;O  |                | M+H            |            |         |
| 846.6018 | 16.20 | 3.68E-10 | 4.06E-09 | 2.4 | Control |  |  | 2.7   | PC 41:7    |                | M+H, M+Na      | C49H84NO8P | 1.267   |
| 806.5725 | 16.21 | 0.044216 | 0.015981 | 1.1 | Control |  |  | 7.67  | PC 38:6    | PC 18:2/20:4   | M+H, M+Na, M+K | C46H80NO8P | -2.615  |
| 496.3402 | 16.27 | 0.000663 | 0.000406 | 1.7 | Control |  |  | 11.59 | LPC 16:0   |                | M+H, M+Na      | C24H50NO7P | 0.865   |
| 794.5681 | 16.29 | 1.98E-06 | 2.35E-06 | 1.9 | Control |  |  | 8.36  | PC 37:5    |                | M+H            | C45H80NO8P | -1.724  |
| 900.6105 | 16.38 | 3.53E-09 | 1.4E-08  | 7.9 | Control |  |  | 12.58 | PC 44:9;O  |                | M+H, M+Na      |            |         |
| 818.5718 | 16.39 | 1.11E-05 | 1.24E-05 | 1.4 | Control |  |  | 4.34  |            |                | Neg            | C47H82NO8P | 1.544   |
| 782.5689 | 16.40 | 4.65E-06 | 4.89E-06 | 2.3 | GM      |  |  | 14.13 | PC 36:4    | PC 18:2/18:2   | M+H            | C44H80NO8P | -0.738  |
| 790.5729 | 16.50 | 3.14E-07 | 4.87E-07 | 1.9 | Control |  |  | 9.2   | PC O-38:7  | PC P-16:0/22:6 | M+H            | C46H80NO7P | -2.051  |
| 820.5832 | 16.55 | 5.21E-08 | 1.15E-07 | 2.2 | Control |  |  | 6.52  | PC 39:6    | PC 17:0/22:6   | M+H            |            |         |
| 808.5841 | 16.63 | 0.006508 | 0.003077 | 1.4 | GM      |  |  | 14.44 | PC 38:5    | PC 18:1/20:4   | M+H            | C46H82NO8P | -1.276  |
| 784.5835 | 16.65 | 7.18E-05 | 5.65E-05 | 1.8 | Control |  |  | 14.81 | PC 36:3    | PC 18:1/18:2   | M+H            | C44H82NO8P | -2.039  |
| 898.5875 | 16.66 | 1.75E-10 | 2.8E-09  | 3.9 | Control |  |  | 6.6   | PC O-43:10 |                | M+FA-H         |            |         |
| 848.6152 | 16.66 | 2.27E-09 | 1.18E-08 | 5.1 | Control |  |  | 12.42 | PC 41:6    |                | M+H, M+Na      | C49H86NO8P | -1.390  |
| 732.5520 | 16.68 | 3.81E-09 | 1.46E-08 | 3.7 | Control |  |  | 10.49 | PC 32:1    | PC 14:0/18:1   | M+H            | C40H78NO8P | -2.424  |
| 860.6147 | 16.76 | 0.002925 | 0.001491 | 1.6 | Control |  |  | 20.08 | PC 42:7    | PC 20:1/22:6   | M+H, M+Na      | C50H86NO8P | -1.900  |
| 810.5980 | 16.78 | 0.000321 | 0.000214 | 1.6 | GM      |  |  | 13.73 | PC 38:4    | PC 18:2/20:2   | M+H            | C46H84NO8P | -3.342  |
| 758.5688 | 16.81 | 3.51E-06 | 3.81E-06 | 2.1 | Control |  |  | 12.92 | PC 34:2    | PC 16:0/18:2   | M+H            | C42H80NO8P | -0.836  |
| 760.5749 | 16.81 | 7.73E-07 | 1.1E-06  | 2.2 | Control |  |  | 11.34 | PC 34:1    | PC 16:0/18:1   | M+H            | C42H82NO8P | -13.454 |
| 792.5881 | 16.81 | 0.001096 | 0.000636 | 1.6 | Control |  |  | 12.76 | PC O-38:6  | PC P-18:0/20:5 | M+H            | C46H82NO7P | -2.635  |
| 772.5833 | 16.88 | 1.59E-09 | 9.57E-09 | 3.1 | Control |  |  | 8.81  | PC 35:2    |                | M+H            | C43H82NO8P | -2.261  |
| 852.6124 | 16.93 | 3.87E-12 | 1.68E-10 | 7.3 | Control |  |  | 7.52  | PC 40:5;O  |                | M+H            |            |         |
| 818.6043 | 17.00 | 2.6E-06  | 2.97E-06 | 2.1 | Control |  |  | 9.3   | PC O-40:7  | PC P-18:0/22:6 | M+H            | C48H84NO7P | -1.815  |
| 766.5718 | 17.04 | 0.0003   | 0.000206 | 1.8 | Control |  |  | 11.95 | PC O-36:5  | PC O-16:0/20:5 | M+H, M+Na      | C41H80NO8P | -1.534  |
| 798.5962 | 17.10 | 1.23E-07 | 2.25E-07 | 2.1 | Control |  |  | 6.96  | PC 37:3    |                | M+H            | C45H84NO8P | -5.682  |
| 786.5996 | 17.22 | 2.59E-08 | 6.85E-08 | 6.0 | Control |  |  | 18.98 | PC 36:2    | PC 18:1/18:1   | M+H            | C44H84NO8P | -1.459  |
| 836.6150 | 17.27 | 3.77E-05 | 3.3E-05  | 2.0 | GM      |  |  | 15.81 | PC 40:5    | PC 18:0/22:5   | M+H            | C48H86NO8P | -1.647  |
| 760.5852 | 17.39 | 3.21E-05 | 2.87E-05 | 1.7 | Control |  |  | 12.86 | PC 34:1    |                | M+H, M+Na      | C42H82NO8P | -1.032  |
| 812.6157 | 17.39 | 8.87E-07 | 1.21E-06 | 2.3 | Control |  |  | 13.05 | PC 38:3    | PC 18:2/20:1   | M+H            | C46H86NO8P | -0.877  |
| 888.6401 | 17.39 | 1.3E-07  | 2.33E-07 | 2.5 | Control |  |  | 6     | PC 44:7    | PC 22:1/22:6   | M+H            | C52H90NO8P | -8.540  |
| 774.5991 | 17.45 | 1.04E-07 | 1.98E-07 | 4.9 | Control |  |  | 11.34 | PC 35:1    |                | M+H            | C43H84NO8P | -2.075  |
| 854.6264 | 17.48 | 3.05E-11 | 5.69E-10 | 7.6 | Control |  |  | 8.43  | PC 40:4;O  |                | M+H            |            |         |
| 800.6162 | 17.54 | 2.91E-08 | 7.44E-08 | 3.1 | Control |  |  | 8.75  | PC 37:2    |                | M+H            | C45H86NO8P | -0.231  |
| 786.6002 | 17.59 | 1.47E-06 | 1.81E-06 | 1.9 | Control |  |  | 9.2   | PC 36:2    |                | M+H            | C44H84NO8P | -0.622  |
| 838.6291 | 17.63 | 1.46E-06 | 1.81E-06 | 2.2 | GM      |  |  | 13.24 | PC 40:4    | PC 20:1/20:3   | M+H            | C48H88NO8P | -3.531  |
| 862.6309 | 17.65 | 3.42E-06 | 3.75E-06 | 2.3 | GM      |  |  | 13.84 | PC 42:6    | PC 20:1/22:5   | M+H            | C50H88NO8P | -1.344  |
| 814.6309 | 18.04 | 1.03E-09 | 7.93E-09 | 2.6 | Control |  |  | 6.93  | PC 38:2    | PC 18:1/20:1   | M+H            | C46H88NO8P | -1.356  |
| 864.6453 | 18.09 | 4.46E-09 | 1.62E-08 | 3.0 | GM      |  |  | 8.58  | PC 42:5    | PC 20:0/22:5   | M+H            | C50H90NO8P | -2.798  |
| 802.6308 | 18.17 | 3.51E-08 | 8.49E-08 | 6.3 | Control |  |  | 14.99 | PC 37:1    |                | M+H            | C45H88NO8P | -1.542  |
| 776.6138 | 18.21 | 6.95E-10 | 6.05E-09 | 6.8 | Control |  |  | 3.4   | PC 35:0    |                | M+H            | C43H86NO8P | -3.389  |
| 840.6455 | 18.21 | 1.27E-07 | 2.3E-07  | 2.0 | Control |  |  | 5.93  | PC 40:3    | PC 20:1/20:2   | M+H            | C48H90NO8P | -2.641  |
| 788.6157 | 18.25 | 4.89E-07 | 7.34E-07 | 1.7 | Control |  |  | 6.29  | PC 36:1    | PC 18:0/18:1   | M+H            | C44H86NO8P | -0.896  |
| 842.6630 | 18.96 | 1.03E-09 | 7.93E-09 | 3.8 | Control |  |  | 7.97  | PC 40:2    | PC 18:1/22:1   | M+H            | C48H92NO8P | -0.454  |
