# Supplementary material for: Profiling Phospholipids within Atlantic Salmon Salmo salar with Regards to a Novel Terrestrial Omega-3 Oil Source
Source: MDPI journal article supplement (doi:10.3390/metabo12090851), 2022-09-10
Supplement: s1 [file s1]

[illegible]

| Simple ID | Primary ID       | Secondary ID             | Brain (Area) |      | Eye (Area) |      | Gill (Area) |      | Intestine (Area) |      | Liver (Area) |      | Brain |      | Eye   |      | Gill  |      | Intestine |      | Liver |      |
|-----------|------------------|--------------------------|--------------|------|------------|------|-------------|------|------------------|------|--------------|------|-------|------|-------|------|-------|------|-----------|------|-------|------|
|           |                  |                          | Int.         |      | Int.       |      | Int.        |      | Int.             |      | Int.         |      | Int.  |      | Int.  |      | Int.  |      | Int.      |      | Int.  |      |
|           |                  |                          | Final        | Fold | Final      | Fold | Final       | Fold | Final            | Fold | Final        | Fold | Final | Fold | Final | Fold | Final | Fold | Final     | Fold | Final | Fold |
| PC 36:3   | PC 18:1/18:2     | PC 18:0/18:3   18:1/18:2 |              |      |            |      |             |      |                  |      |              |      |       |      |       |      |       |      |           |      |       |      |
|           | PC 16:0/20:3 (a) |                          |              |      |            |      |             |      |                  |      |              |      |       |      |       |      |       |      |           |      |       |      |
|           | PC 16:0/20:3 (b) |                          |              |      |            |      |             |      |                  |      |              |      |       |      |       |      |       |      |           |      |       |      |
|           | PC 16:0/20:3 (c) |                          |              |      |            |      |             |      |                  |      |              |      |       |      |       |      |       |      |           |      |       |      |
|           | PC 18:0/18:3     |                          |              |      |            |      |             |      |                  |      |              |      |       |      |       |      |       |      |           |      |       |      |
| PC 36:2   | PC 18:1/18:1     | PC 18:0/18:2             |              |      |            |      |             |      |                  |      |              |      |       |      |       |      |       |      |           |      |       |      |
|           | PC 16:0/20:2 (a) |                          |              |      |            |      |             |      |                  |      |              |      |       |      |       |      |       |      |           |      |       |      |
|           | PC 16:0/20:2 (b) |                          |              |      |            |      |             |      |                  |      |              |      |       |      |       |      |       |      |           |      |       |      |
| PC 38:6   | PC 18:0/18:2     | PC 18:0/18:2             |              |      |            |      |             |      |                  |      |              |      |       |      |       |      |       |      |           |      |       |      |
|           | PC 16:0/22:6     |                          |              |      |            |      |             |      |                  |      |              |      |       |      |       |      |       |      |           |      |       |      |
| PC 38:8   | PC 18:3/20:5     | PC 18:3/20:5             |              |      |            |      |             |      |                  |      |              |      |       |      |       |      |       |      |           |      |       |      |
|           | PC 16:2/22:6     |                          |              |      |            |      |             |      |                  |      |              |      |       |      |       |      |       |      |           |      |       |      |
| PC 38:7   | PC 18:3/20:4     | PC 18:3/20:4             |              |      |            |      |             |      |                  |      |              |      |       |      |       |      |       |      |           |      |       |      |
|           | PC 18:2/20:5     |                          |              |      |            |      |             |      |                  |      |              |      |       |      |       |      |       |      |           |      |       |      |
|           | PC 16:1/22:6 (a) |                          |              |      |            |      |             |      |                  |      |              |      |       |      |       |      |       |      |           |      |       |      |
| PC 38:6   | PC 18:3/20:3     | PC 18:3/20:3             |              |      |            |      |             |      |                  |      |              |      |       |      |       |      |       |      |           |      |       |      |
|           | PC 18:2/20:4     |                          |              |      |            |      |             |      |                  |      |              |      |       |      |       |      |       |      |           |      |       |      |
|           | PC 18:1/20:5     |                          |              |      |            |      |             |      |                  |      |              |      |       |      |       |      |       |      |           |      |       |      |
| PC 38:5   | PC 16:0/22:6     | PC 16:0/22:6             |              |      |            |      |             |      |                  |      |              |      |       |      |       |      |       |      |           |      |       |      |
|           | PC 18:1/20:4 (a) |                          |              |      |            |      |             |      |                  |      |              |      |       |      |       |      |       |      |           |      |       |      |
|           | PC 18:1/20:4 (b) |                          |              |      |            |      |             |      |                  |      |              |      |       |      |       |      |       |      |           |      |       |      |
| PC 38:4   | PC 16:0/22:5 (a) | PC 16:0/22:5 (a)         |              |      |            |      |             |      |                  |      |              |      |       |      |       |      |       |      |           |      |       |      |
|           | PC 18:0/20:5     |                          |              |      |            |      |             |      |                  |      |              |      |       |      |       |      |       |      |           |      |       |      |
|           | PC 16:0/22:5 (b) |                          |              |      |            |      |             |      |                  |      |              |      |       |      |       |      |       |      |           |      |       |      |
| PC 38:3   | PC 18:2/20:2     | PC 18:2/20:2             |              |      |            |      |             |      |                  |      |              |      |       |      |       |      |       |      |           |      |       |      |
|           | PC 18:1/20:3     |                          |              |      |            |      |             |      |                  |      |              |      |       |      |       |      |       |      |           |      |       |      |
|           | PC 18:0/20:3     |                          |              |      |            |      |             |      |                  |      |              |      |       |      |       |      |       |      |           |      |       |      |
| PC 38:2   | PC 18:0/20:2     | PC 18:0/20:2             |              |      |            |      |             |      |                  |      |              |      |       |      |       |      |       |      |           |      |       |      |
|           | PG 22:5/22:6 (a) |                          |              |      |            |      |             |      |                  |      |              |      |       |      |       |      |       |      |           |      |       |      |
|           | PG 22:5/22:6 (b) |                          |              |      |            |      |             |      |                  |      |              |      |       |      |       |      |       |      |           |      |       |      |
| PC 40:9   | PC 20:4/20:5 (a) | PC 20:4/20:5 (a)         |              |      |            |      |             |      |                  |      |              |      |       |      |       |      |       |      |           |      |       |      |
|           | PC 18:3/22:6     |                          |              |      |            |      |             |      |                  |      |              |      |       |      |       |      |       |      |           |      |       |      |
|           | PC 20:4/20:5 (b) |                          |              |      |            |      |             |      |                  |      |              |      |       |      |       |      |       |      |           |      |       |      |
| PC 40:8   | PC 18:3/22:5     | PC 20:4/20:4             |              |      |            |      |             |      |                  |      |              |      |       |      |       |      |       |      |           |      |       |      |
|           | PC 20:3/20:5     |                          |              |      |            |      |             |      |                  |      |              |      |       |      |       |      |       |      |           |      |       |      |
|           | PC 18:2/22:6 (a) |                          |              |      |            |      |             |      |                  |      |              |      |       |      |       |      |       |      |           |      |       |      |
| PC 40:7   | PC 18:2/22:6 (b) | C20:3/20:4               |              |      |            |      |             |      |                  |      |              |      |       |      |       |      |       |      |           |      |       |      |
|           | PC 18:2/22:5     |                          |              |      |            |      |             |      |                  |      |              |      |       |      |       |      |       |      |           |      |       |      |
|           | PC 20:2/20:5     |                          |              |      |            |      |             |      |                  |      |              |      |       |      |       |      |       |      |           |      |       |      |
| PC 40:6   | PC 18:1/22:5 (a) | PC 18:1/22:5 (a)         |              |      |            |      |             |      |                  |      |              |      |       |      |       |      |       |      |           |      |       |      |
|           | PC 18:1/22:5 (b) |                          |              |      |            |      |             |      |                  |      |              |      |       |      |       |      |       |      |           |      |       |      |
|           | PC 18:0/22:6     |                          |              |      |            |      |             |      |                  |      |              |      |       |      |       |      |       |      |           |      |       |      |
| PC 40:5   | PC 18:0/22:5 (a) | PC 16:0/24:5   20:1/20:4 |              |      |            |      |             |      |                  |      |              |      |       |      |       |      |       |      |           |      |       |      |
|           | PC 20:0/20:5     |                          |              |      |            |      |             |      |                  |      |              |      |       |      |       |      |       |      |           |      |       |      |
|           | PC 18:0/22:5 (b) |                          |              |      |            |      |             |      |                  |      |              |      |       |      |       |      |       |      |           |      |       |      |
| PC 40:4   | PC 18:1/20:5     | PC 18:0/22:4   18:1/22:3 |              |      |            |      |             |      |                  |      |              |      |       |      |       |      |       |      |           |      |       |      |
|           | PC 16:0/22:6     |                          |              |      |            |      |             |      |                  |      |              |      |       |      |       |      |       |      |           |      |       |      |
|           | PC 20:1/20:3 (a) |                          |              |      |            |      |             |      |                  |      |              |      |       |      |       |      |       |      |           |      |       |      |
| PC 42:10  | PC 20:1/20:3 (b) | PC 18:0/22:4             |              |      |            |      |             |      |                  |      |              |      |       |      |       |      |       |      |           |      |       |      |
|           | PC 18:0/22:4     |                          |              |      |            |      |             |      |                  |      |              |      |       |      |       |      |       |      |           |      |       |      |
|           | PC 20:0/20:4     |                          |              |      |            |      |             |      |                  |      |              |      |       |      |       |      |       |      |           |      |       |      |
| PC 42:9   | PC 18:1/20:4     | PC 18:1/20:4             |              |      |            |      |             |      |                  |      |              |      |       |      |       |      |       |      |           |      |       |      |
|           | PC 18:0/20:5     |                          |              |      |            |      |             |      |                  |      |              |      |       |      |       |      |       |      |           |      |       |      |
|           | PC 18:0/20:4 (a) |                          |              |      |            |      |             |      |                  |      |              |      |       |      |       |      |       |      |           |      |       |      |
| PC 42:7   | PC 18:0/20:4 (b) | PC 20:2/22:4             |              |      |            |      |             |      |                  |      |              |      |       |      |       |      |       |      |           |      |       |      |
|           | PC 20:1/20:1     |                          |              |      |            |      |             |      |                  |      |              |      |       |      |       |      |       |      |           |      |       |      |
|           | PC 18:1/22:1     |                          |              |      |            |      |             |      |                  |      |              |      |       |      |       |      |       |      |           |      |       |      |
| PC 42:6   | PC 20:5/22:5     | PC 20:2/22:4             |              |      |            |      |             |      |                  |      |              |      |       |      |       |      |       |      |           |      |       |      |
|           | PC 20:4/22:6 (a) |                          |              |      |            |      |             |      |                  |      |              |      |       |      |       |      |       |      |           |      |       |      |
|           | PC 20:4/22:6 (b) |                          |              |      |            |      |             |      |                  |      |              |      |       |      |       |      |       |      |           |      |       |      |
| PC 44:7   | PC 20:4/22:5     | PC 22:3/20:1             |              |      |            |      |             |      |                  |      |              |      |       |      |       |      |       |      |           |      |       |      |
|           | PC 20:3/24:1     |                          |              |      |            |      |             |      |                  |      |              |      |       |      |       |      |       |      |           |      |       |      |
|           | PC 20:4/24:0     |                          |              |      |            |      |             |      |                  |      |              |      |       |      |       |      |       |      |           |      |       |      |
| PC 44:5   | PC 20:2/24:1 (a) | PC 18:1/26:2             |              |      |            |      |             |      |                  |      |              |      |       |      |       |      |       |      |           |      |       |      |
|           | PC 20:2/24:1 (b) |                          |              |      |            |      |             |      |                  |      |              |      |       |      |       |      |       |      |           |      |       |      |
|           | PC 24:1/22:5     |                          |              |      |            |      |             |      |                  |      |              |      |       |      |       |      |       |      |           |      |       |      |
| PC 46:5   | PC 20:5/26:2     | PC 22:4/24:1             |              |      |            |      |             |      |                  |      |              |      |       |      |       |      |       |      |           |      |       |      |
|           | PC 20:4/26:1 (a) |                          |              |      |            |      |             |      |                  |      |              |      |       |      |       |      |       |      |           |      |       |      |
|           | PC 20:4/26:1 (b) |                          |              |      |            |      |             |      |                  |      |              |      |       |      |       |      |       |      |           |      |       |      |

Supplementary Figure S1. Individual lipid isomers detected using LC-MS/MS triple quad mass spectrometry, across 5 tissues and two timepoints. Data is given as absolute peak area (red low, green high area counts) and fold change within a lipid structure (i.e. PC 42:10). The secondary ID indicates a co-eluting peak was detected. For fold changes, green represents GM diet up regulation, with red representing control diet up regulation. For t-test scores, \*\* < 0.01, \* 0.01-0.05, with red values being those which fell below the Benjamini-Hochberg multiple-test critical value.

[illegible]

[illegible]

Supplementary Figure S2. Individual lipid isomers detected using LC-MS/MS triple quad mass spectrometry, across 5 tissues and two timepoints. Data is given as percentage composition and percentage change within a lipid structure (i.e. PC 42:10), with the percentage point change relative to the control. The secondary ID indicates a co-eluting peak was detected. For percentage point changes, green represents GM diet up regulation, with red representing control diet up regulation. For t-test scores, \*\* < 0.01, \* 0.01-0.05, with red values being those which fell below the Benjamini-Hochberg multiple-test critical value.
